# Supplementary material for: In Silico Identification of a BRCA1:miR-29:DNMT3 Axis Involved in the Control of Hormone Receptors in BRCA1-Associated Breast Cancers
Source: Int J Mol Sci. 2023 Jun 8;24(12):9916. doi: 10.3390/ijms24129916 (PMC10298721; doi:10.3390/ijms24129916)
Supplement: Supplementary file 1 [file ijms-24-09916-s001.zip › Supplementary_TablesSantarosa.xlsx]

## Sheet: summary
Suppl. Table S1	Supplementary Table S1 : differentially expressed miRNAs in BRCA1-like vs non-BRCA1-like in the TCGA miRNAseq series obtained on the HiSeq 2000 miRNA Sequencing platform
	log2FoldChange >|0.4|; padj <0.00001; baseMean >5
Suppl. Table S2	Supplementary Table S2: Correlation between levels of miRNAs downregulated in BRCA1-like vs non-BRCA1-like cancers and their targets
	Spearman correlation <-0.35 and p<0.00001
Suppl. Table S3	Supplementary Table S3: TopoGo GO enrichment analysis - Biological Functions
	GO terms with p<0.001
Suppl. Table S4	Supplementary Table S4. Differential methylation (beta-value) of ESR1 CpG probes in the ESR1 negative versus ESR1 positive samples
Suppl. Table S5	Supplementary Table S5. Differential methylation (beta-value) of PGR CpG probes in the PGR negative versus PGR positive samples

## Sheet: Suppl.Table S1
Supplementary Table S1 : differentially expressed miRNAs in BRCA1-like vs non-BRCA1-like in the TCGA miRNAseq series obtained on the HiSeq 2000 miRNA Sequencing platform
miRNA	baseMean	log2FoldChange	pvalue	padj
hsa-miR-449a	35.7624	-2.91615	1.55075e-20	2.02649e-19
hsa-miR-135a-5p	11.6336	-2.22045	1.03666e-19	1.22964e-18
hsa-miR-184	184.506	-1.79248	7.59006e-15	6.80458e-14
hsa-miR-153-3p	19.2185	-1.6429	1.00062e-19	1.20544e-18
hsa-miR-34c-5p	39.3599	-1.48076	4.23248e-29	1.71749e-27
hsa-miR-139-3p	39.4365	-1.36298	2.78528e-25	6.71077e-24
hsa-miR-190b-5p	74.5022	-1.12499	1.9906e-14	1.72444e-13
hsa-miR-342-5p	123.753	-1.08299	5.54594e-23	9.94399e-22
hsa-miR-139-5p	156.617	-1.05632	1.31694e-27	4.61528e-26
hsa-miR-29c-3p	7860.95	-1.00357	7.34905e-28	2.69815e-26
hsa-miR-34c-3p	16.5502	-0.929977	4.3734e-13	3.33851e-12
hsa-miR-342-3p	1764.23	-0.929137	4.03255e-20	5.01467e-19
hsa-miR-34b-3p	5.93236	-0.918091	8.86879e-11	5.38412e-10
hsa-miR-375-3p	106991	-0.91355	3.04471e-08	1.33379e-07
hsa-miR-204-5p	13.0011	-0.883822	6.0397e-08	2.53076e-07
hsa-miR-30c-2-3p	289.21	-0.883228	1.16021e-12	8.60114e-12
hsa-miR-30a-5p	193641	-0.872486	2.87401e-12	2.01442e-11
hsa-miR-10a-5p	148696	-0.834489	4.97177e-10	2.73802e-09
hsa-miR-195-5p	166.225	-0.833899	6.76943e-22	1.04411e-20
hsa-miR-199b-5p	937.151	-0.805865	1.42832e-21	2.0778e-20
hsa-miR-30a-3p	66779.1	-0.795781	1.77866e-10	1.03109e-09
hsa-miR-29b-2-5p	253.708	-0.784048	3.50995e-15	3.26045e-14
hsa-miR-29c-5p	205.028	-0.766266	3.73887e-14	3.13333e-13
hsa-miR-195-3p	18.6192	-0.742664	5.33952e-19	5.96634e-18
hsa-let-7a-5p	141471	-0.738671	7.73497e-24	1.49092e-22
hsa-let-7b-5p	104697	-0.73001	3.64603e-17	3.74812e-16
hsa-miR-10b-3p	69.0995	-0.723552	6.54316e-15	5.93503e-14
hsa-miR-1-3p	19.1958	-0.710418	2.0531e-07	7.92468e-07
hsa-miR-10b-5p	303396	-0.706682	2.17999e-13	1.69775e-12
hsa-miR-218-5p	144.548	-0.656958	2.81712e-19	3.19412e-18
hsa-miR-432-5p	23.0299	-0.627381	1.07628e-10	6.43264e-10
hsa-miR-654-3p	75.3351	-0.621526	1.50694e-10	8.8691e-10
hsa-let-7b-3p	192.177	-0.615663	1.87512e-12	1.32635e-11
hsa-miR-101-3p	43066.7	-0.610379	5.8777e-16	5.52647e-15
hsa-miR-199a-5p	5348.92	-0.573546	4.45851e-11	2.86459e-10
hsa-miR-379-5p	2804.64	-0.565919	4.54416e-09	2.18972e-08
hsa-miR-411-5p	21.1161	-0.560456	3.77255e-07	1.41196e-06
hsa-miR-99a-5p	2973.82	-0.547837	9.7997e-08	3.9148e-07
hsa-miR-26a-5p	6984.06	-0.545994	3.15697e-17	3.28922e-16
hsa-miR-101-5p	26.6067	-0.522237	3.28251e-10	1.86089e-09
hsa-miR-664a-3p	161.603	-0.518938	1.01827e-09	5.3645e-09
hsa-miR-664a-5p	19.7317	-0.516156	6.71553e-10	3.62075e-09
hsa-miR-758-3p	39.2805	-0.513986	1.75895e-07	6.9546e-07
hsa-miR-190a-5p	14.0286	-0.510267	5.88893e-10	3.22012e-09
hsa-miR-337-3p	143.382	-0.497448	5.027e-07	1.85446e-06
hsa-miR-26b-5p	2507.05	-0.485782	4.85373e-14	4.0239e-13
hsa-miR-495-3p	21.6206	-0.480387	8.84655e-08	3.57104e-07
hsa-miR-143-3p	184778	-0.474305	1.26288e-06	4.46642e-06
hsa-let-7f-5p	33216.1	-0.47381	8.15886e-08	3.31078e-07
hsa-miR-145-5p	4977.91	-0.465186	1.76111e-08	7.94046e-08
hsa-miR-497-5p	97.4497	-0.464446	1.06095e-09	5.52698e-09
hsa-miR-100-5p	12661.6	-0.463033	8.57547e-07	3.08957e-06
hsa-miR-625-3p	976.473	-0.462581	9.34113e-07	3.33426e-06
hsa-miR-126-5p	775.803	-0.461591	1.66955e-10	9.75168e-10
hsa-miR-29a-3p	18417.6	-0.443139	1.28227e-09	6.63508e-09
hsa-miR-145-3p	113.137	-0.432635	2.65154e-09	1.31893e-08
hsa-miR-26a-2-3p	16.6701	-0.408802	3.47038e-07	1.30667e-06
hsa-miR-671-5p	17.0844	0.419141	1.78247e-06	6.21848e-06
hsa-miR-200c-5p	171.253	0.437239	1.19182e-07	4.73654e-07
hsa-miR-2355-5p	183.991	0.439241	7.87419e-10	4.21597e-09
hsa-miR-16-2-3p	28.7112	0.457355	2.38019e-09	1.19943e-08
hsa-miR-1287-5p	122.473	0.46762	1.73045e-09	8.83561e-09
hsa-let-7d-3p	1171.3	0.488074	2.13698e-13	1.68123e-12
hsa-miR-590-3p	18.2943	0.515626	1.12349e-11	7.59832e-11
hsa-miR-502-3p	25.2636	0.534533	3.92441e-17	3.98121e-16
hsa-miR-99b-3p	322.572	0.537645	8.43312e-11	5.16027e-10
hsa-miR-186-5p	1056.83	0.542952	8.2557e-22	1.24807e-20
hsa-miR-146a-5p	451.046	0.564123	3.78644e-08	1.63092e-07
hsa-miR-324-3p	87.4855	0.564482	1.94324e-14	1.70254e-13
hsa-miR-155-5p	1570.54	0.568826	7.01523e-09	3.29801e-08
hsa-miR-2355-3p	10.4478	0.571659	2.78485e-10	1.60233e-09
hsa-miR-378a-5p	177.062	0.577886	1.01098e-10	6.08956e-10
hsa-miR-1296-5p	24.448	0.592872	5.90989e-13	4.46718e-12
hsa-miR-106b-5p	873.868	0.594447	7.34345e-19	8.08829e-18
hsa-miR-93-5p	19010.6	0.595771	3.35564e-14	2.84308e-13
hsa-miR-550a-3p	6.5325	0.597601	4.30263e-07	1.59487e-06
hsa-miR-151a-5p	323.579	0.598455	1.81798e-22	3.04709e-21
hsa-miR-324-5p	88.728	0.600012	4.69394e-12	3.26039e-11
hsa-miR-532-5p	2320.25	0.605066	4.97845e-21	6.734e-20
hsa-miR-3170	7.61423	0.625023	6.81583e-07	2.49052e-06
hsa-miR-19b-3p	447.83	0.630235	1.53372e-13	1.21907e-12
hsa-miR-1277-3p	5.03081	0.640118	9.69666e-08	3.89382e-07
hsa-miR-345-5p	85.3149	0.640187	5.33756e-09	2.55606e-08
hsa-miR-92a-1-5p	11.983	0.641178	3.15608e-10	1.80247e-09
hsa-miR-362-5p	35.9371	0.663264	3.5191e-10	1.96611e-09
hsa-miR-500b-5p	11.7498	0.664503	1.68231e-12	1.20099e-11
hsa-miR-939-5p	5.43853	0.666227	6.06741e-10	3.29435e-09
hsa-miR-500a-5p	11.7503	0.666424	1.47459e-12	1.06253e-11
hsa-miR-301a-3p	40.1382	0.666942	1.12332e-08	5.15523e-08
hsa-miR-185-3p	17.892	0.67485	1.36079e-14	1.20594e-13
hsa-miR-3677-3p	48.9259	0.682257	7.59372e-08	3.13089e-07
hsa-miR-183-3p	5.2738	0.689517	1.90532e-08	8.5407e-08
hsa-miR-766-3p	36.3319	0.692344	1.1658e-17	1.24838e-16
hsa-miR-106a-5p	65.7856	0.703762	1.5677e-11	1.03307e-10
hsa-miR-509-3p	14.6584	0.705757	2.73022e-08	1.20286e-07
hsa-miR-744-3p	77.1891	0.708032	1.46548e-11	9.74036e-11
hsa-miR-421	6.95092	0.720184	1.14772e-12	8.59115e-12
hsa-miR-3928-3p	7.47468	0.723436	2.96574e-11	1.9215e-10
hsa-miR-15b-5p	795.25	0.73379	8.51189e-14	6.83611e-13
hsa-miR-31-3p	11.1849	0.741529	2.51337e-06	8.61247e-06
hsa-miR-500a-3p	826.658	0.748702	1.40179e-19	1.63755e-18
hsa-miR-769-3p	8.56272	0.756927	5.24706e-16	4.99442e-15
hsa-miR-92a-3p	32039.1	0.76778	6.23477e-26	1.84885e-24
hsa-miR-19b-1-5p	23.8664	0.777348	1.59886e-21	2.28282e-20
hsa-miR-455-5p	80.392	0.784609	2.85428e-16	2.82135e-15
hsa-miR-576-5p	48.8352	0.801814	1.5086e-25	4.01078e-24
hsa-miR-20a-5p	799.152	0.80633	2.20007e-16	2.20292e-15
hsa-miR-130b-3p	41.8293	0.814635	3.00129e-26	9.25597e-25
hsa-miR-1301-3p	60.1744	0.816985	1.58758e-19	1.8269e-18
hsa-miR-1307-3p	4432.88	0.817208	4.4588e-24	8.81471e-23
hsa-miR-17-3p	777.609	0.822407	4.52279e-23	8.30254e-22
hsa-miR-589-3p	9.65027	0.822733	2.9739e-13	2.29288e-12
hsa-miR-15b-3p	122.121	0.829418	1.3549e-21	2.00889e-20
hsa-miR-940	22.4628	0.830283	7.82483e-12	5.33889e-11
hsa-miR-4326	28.2803	0.835922	2.62963e-08	1.1652e-07
hsa-miR-501-3p	170.298	0.841227	6.77112e-22	1.04411e-20
hsa-miR-93-3p	54.2158	0.850606	2.65112e-25	6.59358e-24
hsa-miR-203a-3p	27618.9	0.865021	1.05753e-08	4.88236e-08
hsa-miR-210-3p	2515.94	0.885544	6.5998e-09	3.12175e-08
hsa-miR-33a-5p	58.861	0.897823	5.37231e-14	4.40643e-13
hsa-miR-1270	8.83017	0.903336	7.35195e-11	4.60842e-10
hsa-miR-197-3p	1210.07	0.908088	2.01602e-43	1.55435e-41
hsa-miR-590-5p	46.9529	0.915311	1.08425e-31	4.64419e-30
hsa-miR-106b-3p	1316.89	0.926215	7.24691e-41	5.07942e-39
hsa-miR-501-5p	7.64683	0.926489	2.64613e-22	4.34078e-21
hsa-miR-130b-5p	45.604	0.926493	1.24091e-25	3.54347e-24
hsa-miR-532-3p	116.014	0.930234	7.35157e-27	2.36169e-25
hsa-miR-1226-3p	6.54675	0.957634	1.30754e-12	9.6011e-12
hsa-miR-1468-5p	26.2149	1.0052	9.80484e-20	1.19993e-18
hsa-miR-19a-3p	86.7798	1.03345	4.04071e-25	9.44057e-24
hsa-miR-3150b-3p	11.8034	1.04534	3.94146e-09	1.91124e-08
hsa-miR-942-5p	18.5635	1.06867	2.79207e-39	1.53763e-37
hsa-miR-20a-3p	28.843	1.08147	3.83196e-24	7.77484e-23
hsa-miR-187-3p	177.909	1.1049	3.27871e-07	1.24526e-06
hsa-miR-505-5p	28.2568	1.12556	1.16727e-39	6.92283e-38
hsa-miR-188-5p	6.16232	1.13215	2.1131e-25	5.43066e-24
hsa-miR-505-3p	122.213	1.21518	1.21827e-61	4.69642e-59
hsa-miR-17-5p	1459.97	1.27349	1.72161e-46	1.6592e-44
hsa-miR-188-3p	5.03304	1.31356	6.10307e-25	1.38396e-23
hsa-miR-877-5p	5.88877	1.31406	1.42821e-25	3.93267e-24
hsa-miR-3200-3p	19.1555	1.33977	1.35515e-22	2.32183e-21
hsa-miR-452-5p	195.455	1.46927	2.63621e-23	4.95735e-22
hsa-miR-455-3p	870.212	1.5171	1.29943e-40	8.34881e-39
hsa-miR-224-3p	7.26141	1.55926	6.72414e-22	1.04411e-20
hsa-miR-584-5p	189.477	1.62087	1.87539e-48	2.06561e-46
hsa-miR-937-3p	17.6554	1.6309	6.35776e-25	1.40052e-23
hsa-miR-885-5p	6.2983	1.64663	7.61638e-14	6.1813e-13
hsa-miR-18a-5p	34.3683	1.71807	2.93599e-61	7.54548e-59
hsa-miR-9-5p	13432.2	1.88121	1.15604e-22	2.02569e-21
hsa-miR-452-3p	12.9014	1.98969	1.63119e-33	7.39792e-32
hsa-miR-9-3p	15.0393	2.06159	2.65286e-24	5.52798e-23
hsa-miR-18a-3p	5.51357	2.11759	9.79988e-57	1.51114e-54
hsa-miR-146a-3p	6.5518	2.1332	1.28702e-11	8.62861e-11
hsa-miR-224-5p	165.917	2.15798	1.07833e-34	5.19618e-33
hsa-miR-1269a	288.96	2.18626	1.47337e-09	7.57311e-09
hsa-miR-135b-5p	65.7253	2.52869	2.25616e-37	1.15967e-35
hsa-miR-105-5p	90.6152	3.23715	1.18705e-18	1.28903e-17
hsa-miR-767-5p	48.476	3.41097	3.92948e-16	3.83498e-15
hsa-miR-519a-5p	10.7123	4.0048	7.98694e-53	1.02632e-50
hsa-miR-516a-5p	9.63811	4.1067	1.77565e-45	1.52114e-43
hsa-miR-577	46.1333	4.69947	4.89171e-89	3.7715e-86
hsa-miR-934	10.4279	4.81066	8.04808e-60	1.55127e-57

## Sheet: Suppl.Table S2
Supplementary Table S2 : Correlation between levels of miRNAs downregulated in BRCA1-like vs non-BRCA1-like cancers and their targets
miR	mRNA	cor	p
hsa-miR-190b-5p	B3GNT5	-0.591137	0
hsa-miR-29b-2-5p	BCL11A	-0.587007	0
hsa-miR-29c-3p	XPO5	-0.582669	0
hsa-miR-29b-2-5p	FAM171A1	-0.581762	0
hsa-miR-190b-5p	MTHFD1L	-0.569895	0
hsa-miR-29b-2-5p	YBX1	-0.56797	0
hsa-miR-29b-2-5p	PRKX	-0.55433	0
hsa-miR-29b-2-5p	UBE2E3	-0.550091	0
hsa-miR-29b-2-5p	FSCN1	-0.549076	0
hsa-miR-190b-5p	MDGA2	-0.549049	0
hsa-miR-190b-5p	FMNL2	-0.546052	0
hsa-miR-29c-5p	FSCN1	-0.545325	0
hsa-miR-29b-2-5p	MTHFD1L	-0.543072	0
hsa-miR-29b-2-5p	STAC	-0.542647	0
hsa-miR-29c-5p	YBX1	-0.5425	0
hsa-miR-29b-2-5p	RGMA	-0.539909	0
hsa-miR-190b-5p	YBX1	-0.53693	0
hsa-miR-29c-5p	BCL11A	-0.536904	0
hsa-miR-29c-3p	CALU	-0.536146	0
hsa-miR-29b-2-5p	TUBB6	-0.535353	0
hsa-miR-29b-2-5p	ARHGEF4	-0.533764	0
hsa-miR-29b-2-5p	FOXC1	-0.533537	0
hsa-miR-29b-2-5p	B3GNT5	-0.533131	0
hsa-miR-190b-5p	RAP2B	-0.532788	0
hsa-miR-29c-5p	FAM171A1	-0.525831	0
hsa-miR-29c-5p	TUBB6	-0.525534	0
hsa-miR-199b-5p	CDC25A	-0.52503	0
hsa-let-7b-5p	CCNE1	-0.524357	0
hsa-miR-190b-5p	MRAS	-0.524239	0
hsa-miR-29b-2-5p	PPP1R14C	-0.523362	0
hsa-let-7a-5p	CCNE1	-0.522474	0
hsa-miR-30c-2-3p	KPNA2	-0.522229	0
hsa-miR-190b-5p	PPP1R14C	-0.52166	0
hsa-miR-29c-3p	MTMR2	-0.52142	0
hsa-miR-29c-5p	ARHGEF4	-0.520696	0
hsa-miR-26a-5p	GMPS	-0.519435	0
hsa-miR-29b-2-5p	TCF7L1	-0.518841	0
hsa-miR-29b-2-5p	ARL4C	-0.515926	0
hsa-miR-190b-5p	UBE2E3	-0.514297	0
hsa-miR-30a-5p	KPNA2	-0.511586	0
hsa-miR-29b-2-5p	RAP2B	-0.51052	0
hsa-miR-29c-3p	E2F3	-0.509904	0
hsa-miR-190b-5p	FOXC1	-0.509818	0
hsa-miR-29c-3p	CORO1C	-0.50967	0
hsa-miR-190b-5p	STAC	-0.508507	0
hsa-miR-190b-5p	GABBR2	-0.507577	0
hsa-miR-190b-5p	SLC16A10	-0.507464	0
hsa-miR-29b-2-5p	IGF2BP2	-0.507268	0
hsa-miR-29b-2-5p	ST8SIA1	-0.507246	0
hsa-miR-190b-5p	FAM171A1	-0.507048	0
hsa-miR-29b-2-5p	CHIC2	-0.506943	0
hsa-miR-29b-2-5p	A2ML1	-0.506682	0
hsa-miR-29b-2-5p	FOSL1	-0.506604	0
hsa-miR-195-5p	KPNA2	-0.503086	0
hsa-miR-29b-2-5p	CHST3	-0.502698	0
hsa-miR-29b-2-5p	PIM1	-0.500895	0
hsa-miR-190b-5p	ARL4C	-0.500235	0
hsa-miR-190b-5p	PPARGC1B	-0.500157	0
hsa-miR-29b-2-5p	MRAS	-0.499597	0
hsa-miR-29c-5p	RGMA	-0.49891	0
hsa-miR-190b-5p	BCL11A	-0.498468	0
hsa-miR-29c-3p	KIF20A	-0.498372	0
hsa-miR-30c-2-3p	CCNA2	-0.497969	0
hsa-miR-195-5p	GMPS	-0.497627	0
hsa-miR-190b-5p	CORO1C	-0.497366	0
hsa-miR-190b-5p	RBMS1	-0.495301	0
hsa-miR-29c-3p	GMPS	-0.49412	0
hsa-miR-29c-3p	YES1	-0.493035	0
hsa-miR-190b-5p	IGF2BP2	-0.493025	0
hsa-miR-26a-5p	XPO5	-0.492877	0
hsa-miR-190b-5p	FOSL1	-0.492579	0
hsa-miR-190b-5p	EPHB6	-0.492532	0
hsa-miR-190b-5p	TUBB6	-0.492061	0
hsa-miR-29c-5p	FOSL1	-0.491527	0
hsa-miR-26a-5p	CCT5	-0.490864	0
hsa-miR-29b-2-5p	EPHB6	-0.490548	0
hsa-miR-30a-5p	HJURP	-0.490371	0
hsa-miR-29b-2-5p	CIB2	-0.490191	0
hsa-miR-30a-5p	CCNA2	-0.489931	0
hsa-miR-29c-5p	MTHFD1L	-0.489822	0
hsa-miR-190b-5p	A2ML1	-0.489292	0
hsa-miR-29c-3p	CDK8	-0.489265	0
hsa-miR-190b-5p	ST8SIA1	-0.487179	0
hsa-miR-29c-5p	EPHB6	-0.487036	0
hsa-miR-190b-5p	ARHGEF4	-0.486904	0
hsa-miR-29b-2-5p	DZIP1	-0.486669	0
hsa-miR-29c-5p	TCF7L1	-0.486272	0
hsa-miR-29b-2-5p	TTYH3	-0.485847	0
hsa-miR-190b-5p	EML4	-0.485787	0
hsa-miR-190b-5p	CHST3	-0.485324	0
hsa-miR-29c-3p	KIF23	-0.48526	0
hsa-miR-29b-2-5p	AGPAT4	-0.484998	0
hsa-miR-29b-2-5p	RBMS1	-0.484953	0
hsa-miR-29b-2-5p	LBR	-0.484465	0
hsa-miR-34c-5p	CHEK1	-0.484199	0
hsa-miR-30c-2-3p	HJURP	-0.483937	0
hsa-miR-29c-5p	FOXC1	-0.483683	0
hsa-miR-26a-5p	KPNA2	-0.483449	0
hsa-miR-29c-5p	PRKX	-0.483272	0
hsa-miR-30a-3p	SLC7A5	-0.48326	0
hsa-miR-375-3p	ST8SIA1	-0.483091	0
hsa-miR-190b-5p	RNF145	-0.482952	0
hsa-miR-29b-2-5p	NFIB	-0.482168	0
hsa-miR-101-3p	KPNA2	-0.481767	0
hsa-miR-29c-3p	MEX3A	-0.481194	0
hsa-miR-199a-5p	CDC25A	-0.480977	0
hsa-miR-29c-3p	COMMD2	-0.480331	0
hsa-miR-29c-3p	TMEFF1	-0.480232	0
hsa-miR-30a-5p	PPP3R1	-0.480134	0
hsa-miR-30a-5p	KIF20A	-0.480022	0
hsa-miR-29c-3p	YWHAQ	-0.479993	0
hsa-miR-29c-3p	CCNA2	-0.479794	0
hsa-miR-218-5p	ESRP1	-0.47971	0
hsa-miR-29c-3p	TMEM65	-0.479514	0
hsa-miR-30c-2-3p	KIF20A	-0.479444	0
hsa-miR-190b-5p	SOD2	-0.478364	0
hsa-miR-29c-3p	MCM6	-0.478305	0
hsa-miR-99a-5p	FAM72B	-0.477896	0
hsa-miR-101-3p	KIF20A	-0.477729	0
hsa-miR-199b-5p	HJURP	-0.476814	0
hsa-miR-10b-3p	HJURP	-0.476803	0
hsa-miR-29b-2-5p	RNF145	-0.476792	0
hsa-miR-101-3p	CCNA2	-0.476778	0
hsa-miR-218-5p	GMPS	-0.476715	0
hsa-miR-26a-5p	KIF23	-0.476688	0
hsa-miR-30a-5p	CDC25A	-0.476453	0
hsa-miR-342-5p	TUBB6	-0.476104	0
hsa-miR-29c-5p	SRF	-0.475817	0
hsa-miR-29c-5p	NOTCH1	-0.474894	0
hsa-miR-29c-3p	CCNE1	-0.47487	0
hsa-miR-30c-2-3p	CDC25A	-0.474838	0
hsa-miR-29c-5p	TTYH3	-0.474477	0
hsa-miR-29b-2-5p	GPX7	-0.474287	0
hsa-miR-10b-5p	CDC25A	-0.474213	0
hsa-miR-30a-5p	LRP8	-0.47411	0
hsa-miR-30c-2-3p	CCNE1	-0.473353	0
hsa-miR-10b-5p	FAM72B	-0.472517	0
hsa-miR-199b-5p	CCNA2	-0.472184	0
hsa-miR-29c-5p	MRAS	-0.472176	0
hsa-miR-26a-5p	PSME4	-0.472096	0
hsa-miR-190b-5p	RASGEF1B	-0.472052	0
hsa-miR-139-5p	TRIM59	-0.472	0
hsa-miR-29c-5p	STAC	-0.471916	0
hsa-miR-29c-3p	EML4	-0.471858	0
hsa-miR-190b-5p	CDK6	-0.47167	0
hsa-miR-26a-5p	CCNA2	-0.47164	0
hsa-miR-190b-5p	RGS20	-0.471616	0
hsa-miR-190b-5p	FSCN1	-0.471298	0
hsa-let-7b-5p	DNMT3B	-0.471001	0
hsa-miR-29a-3p	TDG	-0.470488	0
hsa-miR-29b-2-5p	CORO1C	-0.470358	0
hsa-let-7b-5p	CCNA2	-0.47009	0
hsa-miR-26a-5p	CHEK1	-0.470004	0
hsa-miR-190b-5p	LBR	-0.469698	0
hsa-miR-29b-2-5p	PRKD3	-0.469624	0
hsa-miR-342-5p	FOSL1	-0.469384	0
hsa-miR-10b-5p	HJURP	-0.469216	0
hsa-miR-29c-3p	TET3	-0.469175	0
hsa-miR-190b-5p	MAP7D3	-0.469087	0
hsa-miR-190b-5p	PIM1	-0.469022	0
hsa-miR-26a-5p	MCM6	-0.468626	0
hsa-miR-30a-5p	GINS3	-0.468597	0
hsa-miR-30c-2-3p	PPP3R1	-0.468444	0
hsa-miR-30a-5p	CCNE1	-0.468042	0
hsa-miR-29c-3p	GINS1	-0.467601	0
hsa-miR-190b-5p	ART3	-0.467582	0
hsa-miR-29b-2-5p	ART3	-0.467432	0
hsa-miR-29c-5p	CIB2	-0.467145	0
hsa-miR-29b-2-5p	NOTCH1	-0.466936	0
hsa-miR-10b-3p	CDC25A	-0.466927	0
hsa-miR-29c-3p	CCT5	-0.466677	0
hsa-miR-30a-3p	CCNE1	-0.466572	0
hsa-miR-190b-5p	TMEM65	-0.466015	0
hsa-miR-29c-3p	BEND3	-0.466	0
hsa-miR-195-3p	KPNA2	-0.465804	0
hsa-miR-29b-2-5p	IFRD1	-0.465363	0
hsa-let-7b-5p	CDC25A	-0.465166	0
hsa-miR-190b-5p	IGF2BP3	-0.465069	0
hsa-miR-375-3p	UBE2E3	-0.464855	0
hsa-miR-30a-5p	SLC7A5	-0.464768	0
hsa-miR-190b-5p	RGMA	-0.464701	0
hsa-miR-30c-2-3p	BIRC5	-0.464556	0
hsa-miR-29c-3p	DNMT3B	-0.464526	0
hsa-miR-190b-5p	PRKX	-0.464458	0
hsa-miR-29b-2-5p	SRF	-0.464288	0
hsa-miR-10b-3p	CCNA2	-0.464194	0
hsa-miR-29c-3p	CHEK1	-0.464057	0
hsa-let-7b-5p	HJURP	-0.463611	0
hsa-miR-29c-3p	KPNA4	-0.463212	0
hsa-let-7b-5p	BIRC5	-0.463147	0
hsa-miR-375-3p	PRKX	-0.46298	0
hsa-let-7a-5p	CCNA2	-0.462919	0
hsa-miR-26a-5p	FAM98A	-0.462914	0
hsa-miR-29c-5p	LIMD2	-0.462253	0
hsa-miR-29b-2-5p	MET	-0.462187	0
hsa-let-7b-5p	EZH2	-0.461871	0
hsa-miR-30a-3p	HJURP	-0.46149	0
hsa-miR-29c-3p	SF3B3	-0.461321	0
hsa-miR-26a-5p	KIF20A	-0.461294	0
hsa-miR-101-3p	KIF23	-0.461241	0
hsa-miR-190b-5p	NOTCH1	-0.461117	0
hsa-miR-29c-5p	ARL4C	-0.461075	0
hsa-miR-30a-5p	TMEM65	-0.460703	0
hsa-miR-139-3p	TRIM59	-0.460595	0
hsa-miR-199b-5p	BIRC5	-0.460548	0
hsa-let-7b-5p	FAM72B	-0.460298	0
hsa-miR-29b-2-5p	NMT2	-0.460104	0
hsa-miR-139-3p	GMPS	-0.459451	0
hsa-let-7b-5p	GINS1	-0.459131	0
hsa-miR-101-3p	HJURP	-0.459108	0
hsa-miR-190b-5p	DSC2	-0.459107	0
hsa-miR-101-3p	CCNE1	-0.459092	0
hsa-miR-195-5p	CCT5	-0.459022	0
hsa-miR-30c-2-3p	SLC7A5	-0.459002	0
hsa-miR-190b-5p	MAP4K4	-0.458923	0
hsa-miR-190b-5p	MET	-0.458749	0
hsa-miR-101-3p	GMPS	-0.458613	0
hsa-miR-30c-2-3p	EIF2S2	-0.458593	0
hsa-miR-10b-3p	FAM72B	-0.45836	0
hsa-miR-30a-5p	CASP3	-0.458332	0
hsa-miR-99a-5p	BIRC5	-0.458234	0
hsa-miR-190b-5p	AGPAT4	-0.458233	0
hsa-miR-199b-5p	KPNA2	-0.457857	0
hsa-miR-29c-5p	UBE2E3	-0.457738	0
hsa-miR-30a-5p	BIRC5	-0.457614	0
hsa-miR-29b-2-5p	DNMT3B	-0.457575	0
hsa-miR-190b-5p	NCOA7	-0.457549	0
hsa-miR-29b-2-5p	MAP4K4	-0.457512	0
hsa-miR-26a-5p	NAA50	-0.457381	0
hsa-miR-30c-2-3p	GMPS	-0.457038	0
hsa-miR-101-3p	FAM98A	-0.456608	0
hsa-miR-99a-5p	CCNA2	-0.456478	0
hsa-miR-195-5p	CCNA2	-0.456202	0
hsa-miR-190b-5p	CPA4	-0.456177	0
hsa-miR-29c-5p	PPP1R14C	-0.455894	0
hsa-let-7a-5p	CDC25A	-0.455815	0
hsa-miR-195-5p	CCNE1	-0.455814	0
hsa-miR-190b-5p	CLCN5	-0.455757	0
hsa-miR-29c-3p	PPP3R1	-0.455473	0
hsa-miR-29c-3p	HDAC2	-0.454986	0
hsa-miR-30c-2-3p	CCT5	-0.454921	0
hsa-miR-29b-2-5p	JOSD1	-0.454916	0
hsa-let-7b-5p	HMGA1	-0.454758	0
hsa-miR-195-5p	HMGB3	-0.454712	0
hsa-miR-30c-2-3p	LRP8	-0.454705	0
hsa-miR-190b-5p	LRIG3	-0.454666	0
hsa-miR-30c-2-3p	CCNE2	-0.454643	0
hsa-miR-29b-2-5p	NCOA7	-0.454049	0
hsa-miR-195-5p	KIF20A	-0.453768	0
hsa-miR-29b-2-5p	SCHIP1	-0.453746	0
hsa-let-7b-5p	TIMM8A	-0.453603	0
hsa-miR-29c-3p	TDG	-0.453183	0
hsa-miR-99a-5p	HJURP	-0.452949	0
hsa-miR-29c-3p	PSME4	-0.452883	0
hsa-miR-26a-5p	CALU	-0.452342	0
hsa-miR-29c-5p	B3GNT5	-0.452145	0
hsa-let-7a-5p	EZH2	-0.451911	0
hsa-miR-139-3p	HMGB3	-0.451313	0
hsa-miR-29c-3p	TRIM59	-0.451165	0
hsa-miR-199b-5p	FAM72B	-0.450685	0
hsa-miR-10b-3p	EZH2	-0.450636	0
hsa-miR-30a-3p	BIRC5	-0.450567	0
hsa-miR-195-5p	STIP1	-0.450412	0
hsa-miR-29c-3p	MTHFD1L	-0.450374	0
hsa-miR-195-5p	CHEK1	-0.450322	0
hsa-miR-29b-2-5p	GPM6B	-0.450226	0
hsa-miR-190b-5p	RASSF4	-0.450211	0
hsa-miR-29c-3p	SERBP1	-0.45019	0
hsa-miR-190b-5p	SLC9A6	-0.450184	0
hsa-let-7a-5p	BIRC5	-0.44994	0
hsa-miR-30a-5p	KCMF1	-0.449735	0
hsa-miR-29b-2-5p	TTLL4	-0.4497	0
hsa-miR-34c-5p	CDC25A	-0.449503	0
hsa-miR-30a-3p	CCNA2	-0.449368	0
hsa-miR-30c-2-3p	KIF23	-0.449368	0
hsa-miR-10b-5p	POU4F1	-0.449354	1.33227e-15
hsa-miR-190b-5p	NHSL1	-0.449281	0
hsa-miR-30c-2-3p	CASP3	-0.449263	0
hsa-miR-29b-2-5p	FMNL2	-0.449176	0
hsa-miR-10b-3p	CHEK1	-0.449056	0
hsa-miR-29b-2-5p	ACTB	-0.448849	0
hsa-miR-190b-5p	DZIP1	-0.44864	0
hsa-miR-29c-3p	HJURP	-0.448343	0
hsa-miR-26a-5p	CDK8	-0.448146	0
hsa-miR-29c-5p	PIM1	-0.447851	0
hsa-let-7a-5p	CHEK1	-0.447825	0
hsa-miR-190b-5p	PRKCA	-0.447797	0
hsa-let-7b-5p	FAM136A	-0.447706	0
hsa-miR-664a-5p	MTHFD1L	-0.447603	0
hsa-miR-190b-5p	CPNE8	-0.447598	0
hsa-miR-199b-5p	ATAD2	-0.447495	0
hsa-let-7a-5p	GINS1	-0.447418	0
hsa-miR-190b-5p	USP6NL	-0.447315	0
hsa-miR-29b-2-5p	TMEFF1	-0.447149	0
hsa-miR-30c-2-3p	RAD51	-0.446874	0
hsa-miR-30a-5p	MCM6	-0.446809	0
hsa-miR-29b-2-5p	RASSF4	-0.446587	0
hsa-miR-30a-5p	RAD51	-0.446562	0
hsa-miR-29c-3p	NUP160	-0.446097	0
hsa-miR-30c-2-3p	GINS3	-0.445686	0
hsa-let-7a-5p	SLC7A5	-0.445538	0
hsa-miR-190b-5p	NMT2	-0.445532	0
hsa-miR-34c-5p	GMPS	-0.445344	0
hsa-miR-30a-5p	LMNB1	-0.445221	0
hsa-miR-26a-5p	HJURP	-0.44504	0
hsa-miR-99a-5p	ZNF367	-0.444805	0
hsa-miR-99a-5p	RAD51	-0.444666	0
hsa-miR-190b-5p	PDE7A	-0.444661	0
hsa-miR-99a-5p	KPNA2	-0.444584	0
hsa-miR-30a-3p	CDC25A	-0.444581	0
hsa-miR-139-5p	HMGB3	-0.444446	0
hsa-miR-101-3p	BIRC5	-0.4444	0
hsa-miR-218-5p	KPNA2	-0.444262	0
hsa-miR-99a-5p	CDC25A	-0.444251	0
hsa-miR-99a-5p	CKS2	-0.444196	0
hsa-let-7b-5p	RAD51	-0.443874	0
hsa-miR-30c-2-3p	GINS1	-0.443721	0
hsa-miR-190b-5p	RASGRF1	-0.443693	0
hsa-miR-29c-5p	RELT	-0.443675	0
hsa-miR-34c-5p	CCNA2	-0.443576	0
hsa-miR-101-3p	MAPRE1	-0.44351	0
hsa-miR-190b-5p	NRBF2	-0.443462	0
hsa-miR-29c-5p	PLTP	-0.443457	0
hsa-miR-29b-2-5p	PLTP	-0.443396	0
hsa-miR-29c-3p	SYNCRIP	-0.443304	0
hsa-miR-190b-5p	COL4A4	-0.443231	0
hsa-miR-29c-3p	C16orf87	-0.443135	0
hsa-miR-101-3p	GINS1	-0.443134	0
hsa-let-7a-5p	HJURP	-0.443131	0
hsa-miR-10b-5p	CCNA2	-0.44311	0
hsa-miR-26a-5p	CCNE1	-0.443068	0
hsa-miR-29b-2-5p	KHDRBS3	-0.442843	0
hsa-miR-10b-5p	BIRC5	-0.442662	0
hsa-miR-26a-5p	POLQ	-0.44261	0
hsa-miR-195-5p	MCM6	-0.442557	0
hsa-miR-26a-5p	KPNA4	-0.442533	0
hsa-miR-190b-5p	RHOQ	-0.442505	0
hsa-miR-26a-5p	TRIM59	-0.442029	0
hsa-miR-29c-5p	CHST3	-0.442021	0
hsa-miR-30a-5p	CCNE2	-0.441935	0
hsa-miR-190b-5p	GTDC1	-0.441917	0
hsa-miR-190b-5p	PLTP	-0.441865	0
hsa-miR-195-5p	PDIA6	-0.441825	0
hsa-miR-29c-3p	PLK4	-0.441771	0
hsa-miR-190b-5p	JRKL	-0.44169	0
hsa-miR-29c-5p	IGF2BP2	-0.441621	0
hsa-miR-139-3p	ESRP1	-0.441522	0
hsa-miR-30a-5p	EIF2S2	-0.441313	0
hsa-miR-30c-2-3p	POLQ	-0.441079	0
hsa-miR-29b-2-5p	GABBR2	-0.440892	0
hsa-miR-29b-2-5p	ADAMTS3	-0.440866	0
hsa-miR-190b-5p	SLC7A5	-0.440751	0
hsa-miR-29b-2-5p	SNAI1	-0.440545	0
hsa-miR-199a-5p	HJURP	-0.440197	0
hsa-miR-29c-3p	TIMM8A	-0.44009	0
hsa-miR-190b-5p	CIB2	-0.440073	0
hsa-miR-190b-5p	TMEFF1	-0.439784	0
hsa-miR-195-5p	RAN	-0.439773	0
hsa-miR-30a-3p	EIF2S2	-0.439728	0
hsa-miR-29b-2-5p	LMO4	-0.439672	0
hsa-miR-199b-5p	PBK	-0.439643	0
hsa-miR-29c-3p	RAP2A	-0.439576	0
hsa-miR-30a-5p	DNMT3B	-0.439548	0
hsa-miR-99a-5p	PBK	-0.439426	0
hsa-miR-26a-5p	ESRP1	-0.439186	0
hsa-miR-30a-5p	GMPS	-0.43918	0
hsa-miR-342-5p	JOSD1	-0.439132	0
hsa-miR-29c-5p	ST8SIA1	-0.439061	0
hsa-miR-342-5p	MRAS	-0.439055	0
hsa-let-7b-5p	CKS2	-0.43903	0
hsa-miR-101-3p	HMGB3	-0.438975	0
hsa-miR-199b-5p	POLQ	-0.438967	0
hsa-miR-342-5p	EPHB6	-0.438681	0
hsa-miR-30a-3p	KPNA2	-0.438619	0
hsa-miR-199b-5p	CHEK1	-0.43857	0
hsa-miR-190b-5p	C15orf39	-0.438393	0
hsa-miR-29c-3p	CDC25A	-0.438368	0
hsa-miR-29b-2-5p	SH3GL3	-0.438363	0
hsa-let-7b-5p	EIF2S2	-0.438323	0
hsa-miR-29c-3p	KPNA2	-0.438062	0
hsa-miR-29c-5p	AGPAT4	-0.437851	0
hsa-miR-342-5p	CPA4	-0.437811	0
hsa-let-7b-5p	SLC7A5	-0.437773	0
hsa-miR-30c-2-3p	PSMC2	-0.437764	0
hsa-miR-10a-5p	CDC25A	-0.437708	0
hsa-miR-195-5p	PSME4	-0.437699	0
hsa-miR-30c-2-3p	LMNB1	-0.437691	0
hsa-miR-29c-3p	AMD1	-0.437636	0
hsa-miR-10b-3p	BIRC5	-0.437631	0
hsa-miR-190b-5p	ACSL4	-0.437606	0
hsa-miR-29c-3p	RAD51	-0.437604	0
hsa-miR-199b-5p	ESRP1	-0.437476	0
hsa-miR-29c-3p	MYO10	-0.437449	0
hsa-miR-30a-5p	CCT5	-0.437355	0
hsa-let-7a-5p	RAD51	-0.437225	0
hsa-miR-29c-3p	DSC2	-0.437164	0
hsa-miR-190b-5p	JOSD1	-0.437126	0
hsa-miR-29c-3p	SOX11	-0.436955	0
hsa-miR-26a-5p	HDAC2	-0.436925	0
hsa-miR-30a-5p	KIF23	-0.436919	0
hsa-miR-342-5p	UBE2E3	-0.436896	0
hsa-miR-190b-5p	SLCO5A1	-0.436725	0
hsa-miR-195-5p	BIRC5	-0.436621	0
hsa-miR-29b-2-5p	CPNE8	-0.436569	0
hsa-miR-29b-2-5p	ATP11C	-0.436447	0
hsa-miR-342-5p	MTHFD1L	-0.436124	0
hsa-miR-190b-5p	PRKD3	-0.435972	0
hsa-miR-195-5p	KIF23	-0.435915	0
hsa-miR-101-3p	RAD51	-0.435894	0
hsa-miR-29c-3p	ADAM17	-0.435801	0
hsa-miR-375-3p	SOD2	-0.435768	0
hsa-miR-26a-5p	CUL2	-0.435697	0
hsa-miR-26a-5p	R3HDM1	-0.435677	0
hsa-miR-26a-5p	PNO1	-0.43567	0
hsa-miR-30c-2-3p	FAM72B	-0.435562	0
hsa-miR-199b-5p	EZH2	-0.435531	0
hsa-miR-195-5p	XPO5	-0.435416	0
hsa-miR-29b-2-5p	SOD2	-0.435365	0
hsa-miR-342-5p	IFRD1	-0.435291	0
hsa-miR-29c-5p	RASSF4	-0.435239	0
hsa-let-7a-5p	FAM72B	-0.434869	0
hsa-miR-375-3p	RGMA	-0.434867	0
hsa-miR-29c-5p	DAZAP1	-0.434855	0
hsa-miR-139-5p	HAPLN1	-0.434841	0
hsa-miR-29b-2-5p	DMD	-0.434838	0
hsa-miR-29c-3p	TET1	-0.434822	0
hsa-miR-10b-3p	RAD51	-0.434721	0
hsa-let-7b-5p	ZNRF1	-0.434665	0
hsa-miR-342-5p	FAM171A1	-0.434574	0
hsa-miR-10b-3p	POU4F1	-0.434489	1.33227e-14
hsa-miR-29b-2-5p	SLC6A14	-0.434416	0
hsa-miR-342-5p	FOXC1	-0.434209	0
hsa-miR-195-5p	HJURP	-0.434178	0
hsa-miR-190b-5p	HOXA1	-0.434105	0
hsa-miR-195-5p	CDC25A	-0.434068	0
hsa-miR-26a-5p	SMC6	-0.434014	0
hsa-miR-26a-5p	MTCH2	-0.433884	0
hsa-miR-101-3p	TRIM59	-0.433832	0
hsa-miR-26a-5p	MRPL19	-0.433801	0
hsa-miR-190b-5p	POU4F1	-0.433693	1.5099e-14
hsa-miR-190b-5p	WWTR1	-0.433647	0
hsa-miR-10b-3p	ESRP1	-0.433571	0
hsa-miR-375-3p	STAC	-0.433565	0
hsa-miR-139-5p	GMPS	-0.433304	0
hsa-miR-199b-5p	KIF20A	-0.433253	0
hsa-miR-10b-3p	KIF20A	-0.433094	0
hsa-miR-29c-3p	FAM98A	-0.433054	0
hsa-miR-190b-5p	MPZL2	-0.433032	0
hsa-miR-30a-5p	POLQ	-0.432883	0
hsa-miR-29b-2-5p	MTMR2	-0.432808	0
hsa-miR-30a-5p	ACTR3	-0.432728	0
hsa-miR-29c-3p	BMS1	-0.43257	0
hsa-miR-30c-2-3p	STIP1	-0.432387	0
hsa-miR-29c-5p	PFN1	-0.432374	0
hsa-miR-30c-2-3p	MCM6	-0.432186	0
hsa-miR-29c-3p	MAP4K4	-0.432182	0
hsa-miR-190b-5p	GPM6B	-0.432089	0
hsa-miR-29c-3p	POLQ	-0.432089	0
hsa-miR-342-5p	CIB2	-0.431928	0
hsa-miR-29b-2-5p	LRIG3	-0.431911	0
hsa-miR-199a-5p	BIRC5	-0.431834	0
hsa-miR-26a-5p	RAD51	-0.431681	0
hsa-miR-199b-5p	CIT	-0.431668	0
hsa-miR-29c-3p	NAA50	-0.431594	0
hsa-miR-29c-3p	DYRK2	-0.431384	0
hsa-miR-199a-5p	FAM72B	-0.431188	0
hsa-miR-29b-2-5p	SLCO5A1	-0.43117	0
hsa-miR-29c-3p	EZH2	-0.431166	0
hsa-miR-99a-5p	HSPD1	-0.431121	0
hsa-miR-29b-2-5p	RASGRF1	-0.431088	0
hsa-miR-190b-5p	ADCY7	-0.430984	0
hsa-miR-375-3p	BCL11A	-0.430922	0
hsa-miR-101-3p	CCT5	-0.43092	0
hsa-miR-26a-5p	GINS1	-0.430876	0
hsa-miR-101-3p	FAM72B	-0.430574	0
hsa-miR-195-5p	RAD51	-0.430552	0
hsa-miR-101-3p	EIF2S2	-0.430413	0
hsa-miR-30a-3p	KIF20A	-0.430216	0
hsa-miR-190b-5p	MTMR2	-0.430194	0
hsa-miR-199b-5p	CKS2	-0.430088	0
hsa-miR-190b-5p	RELT	-0.42994	0
hsa-miR-190b-5p	LRP8	-0.429926	0
hsa-miR-29b-2-5p	LIMD2	-0.429842	0
hsa-miR-199a-5p	CCNA2	-0.429286	0
hsa-let-7a-5p	KPNA2	-0.429069	0
hsa-miR-190b-5p	MYO10	-0.429068	0
hsa-miR-101-3p	C16orf87	-0.42891	0
hsa-miR-34c-5p	XPO5	-0.42888	0
hsa-miR-26a-5p	HMGB3	-0.428834	0
hsa-miR-190b-5p	FOXN2	-0.428809	0
hsa-miR-29c-5p	GPX7	-0.428773	0
hsa-miR-10b-3p	KIF23	-0.428676	0
hsa-miR-30a-5p	PSMC2	-0.428649	0
hsa-miR-190b-5p	SCHIP1	-0.428614	0
hsa-miR-29a-3p	KIF23	-0.428557	0
hsa-miR-26a-5p	CDC25A	-0.428363	0
hsa-miR-199b-5p	RAD51	-0.428279	0
hsa-miR-30a-5p	NRBP1	-0.428261	0
hsa-miR-29b-2-5p	KCNS1	-0.428258	0
hsa-let-7a-5p	PDIA6	-0.428181	0
hsa-miR-101-3p	KPNA4	-0.428063	0
hsa-miR-10b-5p	EZH2	-0.428	0
hsa-miR-101-3p	TMEM65	-0.427864	0
hsa-miR-101-3p	PSME4	-0.427861	0
hsa-miR-26a-5p	HSPD1	-0.427809	0
hsa-miR-218-5p	HSPD1	-0.42747	0
hsa-miR-10b-3p	PBK	-0.426957	0
hsa-miR-29b-2-5p	NHSL1	-0.426943	0
hsa-miR-375-3p	KCNQ4	-0.426872	0
hsa-miR-29c-5p	VASN	-0.426793	0
hsa-let-7b-3p	ZNRF1	-0.426692	0
hsa-miR-99a-5p	ESRP1	-0.426633	0
hsa-miR-218-5p	RAD21	-0.426547	0
hsa-miR-10a-5p	BIRC5	-0.426521	0
hsa-miR-342-5p	AGPAT4	-0.426445	0
hsa-miR-10b-5p	CCNE1	-0.426341	0
hsa-miR-30a-3p	RAD51	-0.426326	0
hsa-miR-26a-5p	XPO1	-0.426109	0
hsa-miR-29c-5p	MAP2K3	-0.426057	0
hsa-miR-10b-3p	KPNA2	-0.425893	0
hsa-miR-342-5p	FSCN1	-0.425889	0
hsa-miR-195-5p	EIF2S2	-0.425844	0
hsa-miR-30c-2-3p	KPNA4	-0.425573	0
hsa-miR-199b-5p	PLK4	-0.425561	0
hsa-let-7a-5p	FAM136A	-0.42555	0
hsa-miR-190b-5p	BTG3	-0.425496	0
hsa-miR-29b-2-5p	LANCL3	-0.425481	0
hsa-let-7a-5p	PSMC2	-0.425158	0
hsa-miR-29b-2-5p	NIPAL4	-0.425146	0
hsa-miR-342-5p	BTG3	-0.425128	0
hsa-miR-29b-2-5p	MPZL2	-0.42512	0
hsa-miR-29c-3p	GINS3	-0.425102	0
hsa-miR-29b-2-5p	DSC2	-0.4251	0
hsa-miR-190b-5p	AMD1	-0.42502	0
hsa-miR-30c-2-3p	MAPRE1	-0.424965	0
hsa-miR-99a-5p	CHEK1	-0.424929	0
hsa-miR-29a-3p	CCT5	-0.424862	0
hsa-miR-101-3p	POLQ	-0.424742	0
hsa-let-7a-5p	KIF20A	-0.424647	0
hsa-miR-30a-5p	GINS1	-0.424532	0
hsa-miR-10b-5p	RAD51	-0.424413	0
hsa-miR-101-3p	PSMC2	-0.424317	0
hsa-let-7b-5p	RAN	-0.424187	0
hsa-miR-29a-3p	KIF20A	-0.424108	0
hsa-miR-10b-5p	CHEK1	-0.424083	0
hsa-miR-29a-3p	STAU1	-0.424016	0
hsa-miR-29c-5p	GABBR2	-0.424003	0
hsa-miR-375-3p	CHST3	-0.423934	0
hsa-let-7a-5p	KCTD5	-0.423907	0
hsa-miR-30a-3p	CHAC1	-0.423449	0
hsa-let-7a-5p	RAN	-0.42323	0
hsa-miR-29c-3p	A2ML1	-0.423115	0
hsa-miR-375-3p	ARL4C	-0.423113	0
hsa-miR-10b-3p	MTBP	-0.423001	0
hsa-miR-29c-3p	BIRC5	-0.422984	0
hsa-miR-10a-5p	HJURP	-0.422842	0
hsa-miR-30c-2-3p	YWHAZ	-0.422814	0
hsa-miR-29b-2-5p	KLF5	-0.422752	0
hsa-miR-30a-3p	DNMT3B	-0.422678	0
hsa-miR-34c-5p	RAD51	-0.422626	0
hsa-miR-29a-3p	TIMELESS	-0.422426	0
hsa-let-7a-5p	EIF2S2	-0.422348	0
hsa-miR-29b-2-5p	MAP7D3	-0.422331	0
hsa-miR-342-5p	C15orf39	-0.422323	0
hsa-miR-30c-2-3p	TMEM65	-0.422163	0
hsa-let-7b-3p	DAZAP1	-0.422162	0
hsa-miR-199a-5p	KPNA2	-0.422161	0
hsa-let-7a-5p	PSME4	-0.422096	0
hsa-miR-342-5p	PDXK	-0.422057	0
hsa-miR-218-5p	CCNE2	-0.421918	0
hsa-miR-190b-5p	TTLL4	-0.421826	0
hsa-miR-199b-5p	ME2	-0.42176	0
hsa-miR-342-5p	A2ML1	-0.421601	0
hsa-miR-342-5p	CHST3	-0.421508	0
hsa-miR-190b-5p	SH3GL3	-0.421458	0
hsa-miR-29a-3p	GINS1	-0.421428	0
hsa-miR-101-3p	CHEK1	-0.42129	0
hsa-miR-342-3p	JOSD1	-0.421176	0
hsa-miR-30a-5p	ACTR2	-0.420863	0
hsa-miR-432-5p	ESRP1	-0.420802	0
hsa-miR-29b-2-5p	CCNY	-0.420599	0
hsa-miR-29b-2-5p	EML4	-0.42054	0
hsa-miR-218-5p	TRIM59	-0.420476	0
hsa-miR-29c-3p	PRKX	-0.420472	0
hsa-miR-199b-5p	KIF23	-0.420462	0
hsa-miR-218-5p	CDC25A	-0.420337	0
hsa-miR-10b-3p	ZNF367	-0.420323	0
hsa-miR-342-5p	YBX1	-0.420289	0
hsa-miR-29c-3p	WDR43	-0.420285	0
hsa-miR-29b-2-5p	PHF19	-0.42026	0
hsa-miR-29c-3p	MTBP	-0.420031	0
hsa-miR-29c-5p	RAP2B	-0.41982	0
hsa-miR-190b-5p	C2orf88	-0.419775	0
hsa-miR-29c-3p	SMC6	-0.419734	0
hsa-miR-99a-5p	POLQ	-0.419661	0
hsa-miR-29c-5p	SLCO5A1	-0.419648	0
hsa-miR-101-3p	CKS2	-0.41958	0
hsa-miR-190b-5p	SLC6A14	-0.419546	0
hsa-miR-199b-5p	LMNB1	-0.419506	0
hsa-miR-26a-5p	NAA15	-0.419463	0
hsa-miR-29a-3p	XPO5	-0.419438	0
hsa-miR-34c-5p	HJURP	-0.419383	0
hsa-miR-218-5p	POLQ	-0.419348	0
hsa-miR-10b-5p	KIF20A	-0.419262	0
hsa-miR-99a-5p	GINS1	-0.419157	0
hsa-let-7b-5p	CHEK1	-0.419127	0
hsa-miR-29b-2-5p	ACSL4	-0.418951	0
hsa-miR-30a-3p	LRP8	-0.418916	0
hsa-miR-190b-5p	UBE2E2	-0.418783	0
hsa-miR-375-3p	FOXC1	-0.41874	0
hsa-miR-375-3p	TCF7L1	-0.418701	0
hsa-miR-190b-5p	ISL2	-0.418584	0
hsa-miR-34c-5p	KPNA2	-0.418567	0
hsa-miR-29c-5p	A2ML1	-0.41845	0
hsa-miR-99a-5p	SLBP	-0.418412	0
hsa-miR-29a-3p	MAPRE1	-0.418384	0
hsa-miR-101-3p	CDK8	-0.418357	0
hsa-miR-190b-5p	SEL1L3	-0.418092	0
hsa-miR-375-3p	FAM171A1	-0.418075	0
hsa-let-7b-3p	CDC34	-0.418034	0
hsa-miR-29a-3p	CCNF	-0.417887	0
hsa-miR-30a-5p	STIP1	-0.417745	0
hsa-miR-342-5p	KCNN4	-0.417503	0
hsa-miR-190b-5p	IFRD1	-0.417442	0
hsa-let-7a-5p	CKS2	-0.417411	0
hsa-miR-29c-5p	RPS6KA4	-0.417374	0
hsa-miR-190b-5p	NIPAL4	-0.417358	0
hsa-miR-99a-5p	CCNE2	-0.417326	0
hsa-miR-218-5p	PDCD10	-0.417226	0
hsa-miR-29c-3p	DOCK7	-0.416901	0
hsa-miR-30c-2-3p	ACTR3	-0.41681	0
hsa-miR-29c-3p	FAM136A	-0.416791	0
hsa-miR-99a-5p	EZH2	-0.416715	0
hsa-miR-10b-3p	POLQ	-0.416696	0
hsa-miR-29b-2-5p	BCL11B	-0.416696	0
hsa-miR-26a-5p	YWHAG	-0.416624	0
hsa-miR-139-5p	NETO1	-0.416535	0
hsa-miR-29c-3p	ITGB1	-0.416521	0
hsa-miR-29b-2-5p	RGS20	-0.416343	0
hsa-let-7a-5p	GMPS	-0.416221	0
hsa-miR-199b-5p	CCNE2	-0.416143	0
hsa-miR-30a-5p	FAM72B	-0.416112	0
hsa-miR-26a-5p	LRPPRC	-0.415967	0
hsa-miR-29b-2-5p	PRKCA	-0.415872	0
hsa-miR-664a-5p	YBX1	-0.415816	0
hsa-miR-342-5p	ARHGEF4	-0.415814	0
hsa-miR-190b-5p	CYP7B1	-0.415744	0
hsa-miR-101-3p	CDC25A	-0.415698	0
hsa-miR-34c-5p	ESRP1	-0.415685	0
hsa-miR-101-3p	ACTR3	-0.415677	0
hsa-miR-190b-5p	CHRNA5	-0.415631	0
hsa-miR-29b-2-5p	FZD7	-0.415624	0
hsa-miR-29b-2-5p	FAM126A	-0.415619	0
hsa-miR-29b-2-5p	ID4	-0.415519	0
hsa-miR-342-5p	NOTCH1	-0.415433	0
hsa-miR-30a-5p	C16orf87	-0.415361	0
hsa-miR-26a-5p	PDCD10	-0.41519	0
hsa-miR-664a-5p	RELT	-0.415056	0
hsa-miR-29b-2-5p	NRBP1	-0.415	0
hsa-let-7a-5p	KIF23	-0.414886	0
hsa-miR-101-3p	CALU	-0.414837	0
hsa-miR-29b-2-5p	SLC16A1	-0.414792	0
hsa-miR-497-5p	HMGA1	-0.414766	0
hsa-miR-10a-5p	FAM72B	-0.414751	0
hsa-miR-29c-3p	B4GALT5	-0.41472	0
hsa-miR-29c-3p	INCENP	-0.414648	0
hsa-miR-375-3p	WWTR1	-0.414595	0
hsa-miR-29c-3p	KCMF1	-0.414582	0
hsa-miR-29b-2-5p	CX3CL1	-0.414487	0
hsa-miR-190b-5p	PLS3	-0.414477	0
hsa-miR-29b-2-5p	FBXO10	-0.414252	0
hsa-miR-29c-5p	SOCS1	-0.414187	0
hsa-miR-100-5p	CDC25A	-0.414171	0
hsa-miR-139-5p	ESRP1	-0.41417	0
hsa-miR-26a-5p	YWHAQ	-0.414167	0
hsa-miR-30a-5p	KPNA4	-0.41411	0
hsa-let-7b-5p	CCNF	-0.414081	0
hsa-miR-190b-5p	GLS	-0.414054	0
hsa-miR-10b-3p	CIT	-0.414028	0
hsa-let-7a-5p	HDAC2	-0.413999	0
hsa-miR-190b-5p	SNAI1	-0.413899	0
hsa-miR-29c-3p	XPO1	-0.413676	0
hsa-miR-190b-5p	ATP11C	-0.413637	0
hsa-let-7a-5p	MTHFD1L	-0.413382	0
hsa-miR-29b-2-5p	NASP	-0.413273	0
hsa-miR-29b-2-5p	SERBP1	-0.413256	0
hsa-miR-342-5p	CCNE1	-0.413167	0
hsa-miR-218-5p	KIF23	-0.413158	0
hsa-miR-29c-3p	MAPRE1	-0.413086	0
hsa-miR-199b-5p	MCM2	-0.412979	0
hsa-miR-195-5p	PSMC2	-0.412976	0
hsa-miR-29c-3p	NHSL1	-0.412972	0
hsa-miR-29c-5p	ACTB	-0.412854	0
hsa-miR-190b-5p	C16orf87	-0.412838	0
hsa-miR-199a-5p	EZH2	-0.412812	0
hsa-miR-29b-2-5p	MDGA2	-0.412807	2.07034e-12
hsa-miR-30a-5p	CBFB	-0.412789	0
hsa-miR-29b-2-5p	GTDC1	-0.412694	0
hsa-miR-29b-2-5p	SEPHS1	-0.412681	0
hsa-miR-29b-2-5p	TMEM65	-0.41266	0
hsa-miR-139-5p	COL11A1	-0.412646	0
hsa-miR-29a-3p	TOP1	-0.412591	0
hsa-miR-29c-5p	NASP	-0.412534	0
hsa-miR-379-5p	ZNF367	-0.412511	0
hsa-miR-34c-5p	LRP8	-0.412447	0
hsa-miR-29b-2-5p	RELT	-0.412384	0
hsa-miR-34c-5p	HSPD1	-0.412245	0
hsa-miR-29b-2-5p	PTCHD1	-0.412229	0
hsa-miR-342-5p	BCL11A	-0.412119	0
hsa-miR-29c-3p	GNAI3	-0.412063	0
hsa-miR-101-3p	TDG	-0.412058	0
hsa-miR-29b-2-5p	MYO10	-0.411916	0
hsa-miR-29b-2-5p	HOXA1	-0.411896	0
hsa-miR-29b-2-5p	PPARGC1B	-0.411802	0
hsa-miR-34c-5p	FAM72B	-0.411801	0
hsa-miR-190b-5p	ABCC4	-0.41175	0
hsa-miR-139-5p	CKS2	-0.411703	0
hsa-miR-342-5p	B3GNT5	-0.411583	0
hsa-miR-26a-5p	BIRC5	-0.411536	0
hsa-miR-29b-2-5p	BTG3	-0.411443	0
hsa-miR-190b-5p	CCNE1	-0.411329	0
hsa-miR-29b-2-5p	ITPRIP	-0.411299	0
hsa-miR-30a-5p	FAM98A	-0.411239	0
hsa-miR-30c-2-3p	DPYSL5	-0.411194	1.31006e-14
hsa-miR-190b-5p	PDIA6	-0.411088	0
hsa-miR-29b-2-5p	ZIC1	-0.410956	0
hsa-miR-29c-3p	RTKN2	-0.410888	0
hsa-miR-29a-3p	KPNA2	-0.410586	0
hsa-miR-26a-5p	EZH2	-0.410463	0
hsa-miR-218-5p	ATAD2	-0.410453	0
hsa-miR-190b-5p	DDX19A	-0.41022	0
hsa-miR-29c-3p	ACTR3	-0.4101	0
hsa-miR-375-3p	AGPAT4	-0.409907	0
hsa-miR-29c-3p	RAN	-0.409761	0
hsa-miR-99a-5p	KIF23	-0.409678	0
hsa-miR-190b-5p	LANCL3	-0.409582	0
hsa-miR-379-5p	ESRP1	-0.409501	0
hsa-miR-190b-5p	TNFRSF21	-0.409474	0
hsa-miR-30a-5p	YWHAZ	-0.409464	0
hsa-miR-342-3p	TUBB6	-0.409435	0
hsa-miR-99a-5p	CIT	-0.409334	0
hsa-miR-342-5p	PPP1R14C	-0.409212	0
hsa-miR-342-5p	ARL4C	-0.409177	0
hsa-miR-29b-2-5p	PRKCQ	-0.409093	0
hsa-let-7b-5p	KPNA2	-0.408979	0
hsa-miR-29b-2-5p	KCNQ4	-0.408975	0
hsa-miR-29c-5p	ART3	-0.408932	0
hsa-miR-195-5p	HSPD1	-0.408829	0
hsa-miR-199b-5p	RAD21	-0.40879	0
hsa-miR-29b-2-5p	TTYH1	-0.408787	0
hsa-miR-29c-3p	TFRC	-0.408783	0
hsa-miR-30c-2-3p	SURF4	-0.408705	0
hsa-miR-342-5p	TNFRSF21	-0.408704	0
hsa-miR-195-5p	HDAC2	-0.408621	0
hsa-miR-101-3p	HSPD1	-0.408584	0
hsa-miR-30c-2-3p	KCMF1	-0.408564	0
hsa-miR-664a-5p	CCNE1	-0.408555	0
hsa-miR-190b-5p	KCNN4	-0.408359	0
hsa-miR-195-5p	POLQ	-0.408345	0
hsa-miR-26a-5p	PLK4	-0.408336	0
hsa-miR-99a-5p	LMNB1	-0.408269	0
hsa-miR-29b-2-5p	BEND3	-0.408244	0
hsa-miR-195-3p	CCT5	-0.408167	0
hsa-miR-29b-2-5p	KCNN4	-0.408068	0
hsa-miR-10b-5p	LRP8	-0.408066	0
hsa-miR-29c-3p	SLC16A1	-0.408061	0
hsa-miR-199b-5p	HSPD1	-0.407807	0
hsa-miR-29c-5p	DZIP1	-0.407804	0
hsa-miR-29b-2-5p	JRKL	-0.407723	0
hsa-miR-29b-2-5p	PDE7A	-0.40764	0
hsa-let-7a-5p	KCMF1	-0.40756	0
hsa-miR-26a-5p	FAM72B	-0.407465	0
hsa-miR-190b-5p	QKI	-0.407464	0
hsa-miR-101-3p	KCMF1	-0.407449	0
hsa-miR-190b-5p	RPS6KA3	-0.407431	0
hsa-miR-10b-3p	GMPS	-0.407314	0
hsa-miR-30c-2-3p	EZH2	-0.40731	0
hsa-miR-29b-2-5p	CCNE1	-0.407229	0
hsa-miR-101-3p	YWHAG	-0.407211	0
hsa-miR-139-5p	GINS1	-0.407098	0
hsa-miR-375-3p	KCNN4	-0.407073	0
hsa-miR-29c-3p	NKRF	-0.407016	0
hsa-miR-29b-2-5p	CDK6	-0.406909	0
hsa-miR-26a-5p	PPP3R1	-0.406843	0
hsa-miR-29b-2-5p	LIX1L	-0.406829	0
hsa-miR-100-5p	CKS2	-0.4068	0
hsa-miR-29c-3p	LMNB1	-0.406743	0
hsa-miR-29c-3p	R3HDM1	-0.40666	0
hsa-miR-190b-5p	RAP2A	-0.406533	0
hsa-miR-29c-3p	CCNY	-0.40653	0
hsa-miR-99a-5p	PLK4	-0.406525	0
hsa-miR-199b-5p	ZNF367	-0.40649	0
hsa-miR-190b-5p	RRAGD	-0.406474	0
hsa-miR-29c-3p	ATP11C	-0.406392	0
hsa-miR-26a-5p	MTBP	-0.406387	0
hsa-miR-29c-3p	LBR	-0.406387	0
hsa-miR-375-3p	GPM6B	-0.406251	0
hsa-miR-199a-5p	LRP8	-0.406238	0
hsa-miR-29c-5p	CHIC2	-0.406162	0
hsa-miR-190b-5p	BCL11B	-0.406109	0
hsa-let-7a-5p	TIMM8A	-0.406093	0
hsa-miR-101-3p	RAB1A	-0.406036	0
hsa-miR-29c-3p	BCAT1	-0.406022	0
hsa-miR-190b-5p	KCMF1	-0.405963	0
hsa-miR-10b-5p	SH3GL3	-0.405907	4.44089e-16
hsa-miR-199b-5p	LRP8	-0.40583	0
hsa-miR-342-5p	TTLL4	-0.405708	0
hsa-miR-10b-5p	MCM2	-0.405695	0
hsa-miR-99a-5p	HMGB3	-0.405648	0
hsa-miR-379-5p	PBK	-0.405497	0
hsa-miR-29b-2-5p	TBPL1	-0.405242	0
hsa-miR-29c-3p	NRBF2	-0.405169	0
hsa-miR-101-3p	EZH2	-0.405139	0
hsa-miR-29b-2-5p	SLC16A10	-0.405119	0
hsa-miR-29c-3p	CLCN5	-0.405096	0
hsa-miR-26a-5p	MAPRE1	-0.405063	0
hsa-miR-29c-3p	TAF5	-0.405063	0
hsa-miR-195-3p	KIF20A	-0.404957	0
hsa-miR-375-3p	NOTCH1	-0.404955	0
hsa-miR-30a-5p	DPYSL5	-0.404866	3.59712e-14
hsa-miR-10b-3p	ATAD2	-0.404753	0
hsa-miR-101-3p	BCAT1	-0.404665	0
hsa-miR-29c-5p	PCBP4	-0.404475	0
hsa-miR-101-3p	PPP3R1	-0.404423	0
hsa-miR-199a-5p	CKS2	-0.404422	0
hsa-miR-101-3p	LDHA	-0.404377	0
hsa-miR-190b-5p	ITPRIP	-0.404366	0
hsa-miR-190b-5p	GLG1	-0.404326	0
hsa-miR-26a-5p	STIP1	-0.404256	0
hsa-let-7a-5p	MCM6	-0.404234	0
hsa-miR-342-5p	DNMT3B	-0.404181	0
hsa-miR-34c-5p	ME2	-0.404112	0
hsa-miR-30a-3p	FAM72B	-0.404094	0
hsa-miR-199a-5p	ATAD2	-0.404043	0
hsa-miR-195-5p	LMNB1	-0.403987	0
hsa-miR-190b-5p	CCDC88A	-0.403973	0
hsa-miR-139-5p	CHEK1	-0.403905	0
hsa-miR-218-5p	CHEK1	-0.403893	0
hsa-miR-190b-5p	CCNYL1	-0.403859	0
hsa-miR-29a-3p	LMNB1	-0.40382	0
hsa-miR-30a-3p	A2ML1	-0.403648	0
hsa-miR-29b-2-5p	NRBF2	-0.403575	0
hsa-miR-218-5p	INTS8	-0.403407	0
hsa-miR-342-5p	MDGA2	-0.403387	7.18536e-12
hsa-miR-26a-5p	INTS8	-0.403351	0
hsa-miR-30c-2-3p	XPO5	-0.403308	0
hsa-miR-30a-3p	ZNRF1	-0.403214	0
hsa-miR-195-3p	RCC2	-0.403191	0
hsa-miR-26a-5p	YES1	-0.403177	0
hsa-miR-199a-5p	PBK	-0.402821	0
hsa-miR-190b-5p	HECA	-0.402718	0
hsa-miR-190b-5p	KLF11	-0.402714	0
hsa-miR-190b-5p	SERBP1	-0.4026	0
hsa-miR-195-5p	MTCH2	-0.402187	0
hsa-miR-30a-3p	GINS3	-0.40218	0
hsa-miR-139-5p	INTS8	-0.402161	0
hsa-miR-139-5p	CDC25A	-0.40201	0
hsa-miR-139-5p	KIF20A	-0.401983	0
hsa-miR-34c-5p	POLQ	-0.401966	0
hsa-miR-139-3p	CHEK1	-0.401954	0
hsa-miR-101-3p	SOX11	-0.401941	0
hsa-miR-29b-2-5p	CDCA4	-0.401899	0
hsa-miR-101-3p	GOLT1B	-0.401848	0
hsa-miR-190b-5p	FAT1	-0.401844	0
hsa-miR-101-3p	MCM6	-0.401646	0
hsa-miR-190b-5p	CHIC2	-0.401609	0
hsa-miR-190b-5p	KCNS1	-0.401352	0
hsa-miR-29b-2-5p	SOCS1	-0.401279	0
hsa-miR-195-5p	HSP90B1	-0.401213	0
hsa-let-7a-5p	TBPL1	-0.401167	0
hsa-miR-190b-5p	BAG2	-0.401054	0
hsa-miR-195-5p	MAPRE1	-0.401019	0
hsa-miR-342-5p	SH3GL3	-0.400971	8.88178e-16
hsa-miR-195-3p	STIP1	-0.40095	0
hsa-miR-342-3p	CPA4	-0.400869	0
hsa-miR-29c-3p	FMNL2	-0.400869	0
hsa-miR-30c-2-3p	DNMT3B	-0.400803	0
hsa-miR-10a-5p	CCNA2	-0.400783	0
hsa-miR-29c-3p	PANX1	-0.400702	0
hsa-let-7b-5p	POLQ	-0.400642	0
hsa-miR-29c-3p	RALA	-0.400369	0
hsa-miR-29c-3p	CCNJ	-0.400273	0
hsa-let-7b-5p	KIF20A	-0.400243	0
hsa-miR-29b-2-5p	E2F3	-0.400235	0
hsa-let-7a-5p	DNMT3B	-0.400177	0
hsa-miR-34c-5p	BIRC5	-0.400148	0
hsa-miR-99a-5p	KIF20A	-0.400134	0
hsa-let-7a-5p	POLQ	-0.400067	0
hsa-miR-190b-5p	PSME4	-0.40004	0
hsa-miR-190b-5p	DMD	-0.399819	0
hsa-miR-100-5p	CCNE2	-0.399746	0
hsa-miR-190b-5p	KCNQ4	-0.399745	0
hsa-miR-26a-5p	LCLAT1	-0.3997	0
hsa-miR-29b-2-5p	IGF2BP3	-0.399443	0
hsa-miR-30c-2-3p	HMGB3	-0.399441	0
hsa-miR-199b-5p	MCM6	-0.399398	0
hsa-miR-29b-2-5p	SLC10A3	-0.399398	0
hsa-miR-29b-2-5p	INA	-0.399376	0
hsa-miR-30a-5p	YWHAG	-0.399093	0
hsa-miR-26a-5p	E2F3	-0.399012	0
hsa-miR-29c-3p	CDK2AP1	-0.398946	0
hsa-miR-29b-2-5p	PFN1	-0.398723	0
hsa-miR-10b-3p	LRP8	-0.398723	0
hsa-miR-199b-5p	MTBP	-0.398612	0
hsa-miR-30c-2-3p	FAM98A	-0.398546	0
hsa-miR-100-5p	HJURP	-0.398511	0
hsa-miR-29c-5p	PHF19	-0.39844	0
hsa-let-7a-5p	IFRD1	-0.398429	0
hsa-miR-26a-5p	CCNE2	-0.3984	0
hsa-miR-379-5p	FAM72B	-0.398362	0
hsa-miR-100-5p	ESRP1	-0.398284	0
hsa-miR-199b-5p	CABLES2	-0.398263	0
hsa-miR-218-5p	ZNF367	-0.398215	0
hsa-miR-30c-2-3p	C16orf87	-0.398186	0
hsa-miR-26a-5p	LRP8	-0.398175	0
hsa-miR-29c-3p	USP6NL	-0.398167	0
hsa-miR-29c-3p	B3GNT5	-0.398036	0
hsa-miR-26a-5p	YWHAZ	-0.397973	0
hsa-miR-30c-2-3p	HSPD1	-0.397969	0
hsa-miR-30c-2-3p	GOLT1B	-0.397902	0
hsa-miR-199b-5p	XPO5	-0.39783	0
hsa-miR-375-3p	B3GNT5	-0.397826	0
hsa-miR-29b-2-5p	PNRC1	-0.397771	0
hsa-miR-139-3p	INTS8	-0.397759	0
hsa-miR-101-3p	PLK4	-0.397756	0
hsa-miR-30a-5p	FAM136A	-0.397663	0
hsa-let-7a-5p	MAPRE1	-0.397601	0
hsa-let-7a-5p	A2ML1	-0.397597	0
hsa-miR-29c-5p	DCAF15	-0.397571	0
hsa-let-7b-5p	KCTD5	-0.397555	0
hsa-miR-190b-5p	SH3KBP1	-0.397529	0
hsa-miR-26a-5p	ACTR2	-0.397462	0
hsa-miR-218-5p	CCT5	-0.397379	0
hsa-let-7a-5p	CCNF	-0.397207	0
hsa-let-7a-5p	AMD1	-0.397188	0
hsa-let-7b-5p	RHEB	-0.397187	0
hsa-miR-664a-3p	YBX1	-0.397157	0
hsa-miR-29c-3p	CBFB	-0.397149	0
hsa-miR-199a-5p	LMNB1	-0.397088	0
hsa-miR-101-3p	XPO5	-0.397077	0
hsa-let-7b-3p	VASN	-0.397059	0
hsa-miR-199a-5p	POLQ	-0.39702	0
hsa-miR-29c-3p	SSRP1	-0.396903	0
hsa-miR-218-5p	YWHAZ	-0.396896	0
hsa-miR-199a-5p	CIT	-0.396887	0
hsa-miR-10b-5p	CKS2	-0.396798	0
hsa-miR-10b-3p	CCNE1	-0.396763	0
hsa-miR-218-5p	HMGB3	-0.396552	0
hsa-miR-29b-2-5p	WWTR1	-0.396501	0
hsa-miR-195-3p	BIRC5	-0.396408	0
hsa-miR-190b-5p	ADAMTS3	-0.396314	0
hsa-miR-101-3p	RAN	-0.396272	0
hsa-miR-379-5p	CDC25A	-0.395993	0
hsa-miR-30c-2-3p	TRIM59	-0.395934	0
hsa-miR-30a-5p	LBR	-0.395857	0
hsa-miR-101-3p	FAM136A	-0.395809	0
hsa-miR-34c-5p	EZH2	-0.395724	0
hsa-miR-190b-5p	FAM98A	-0.395706	0
hsa-miR-30a-3p	NRBP1	-0.395671	0
hsa-miR-664a-5p	CCNA2	-0.395628	0
hsa-miR-101-3p	YWHAQ	-0.395602	0
hsa-let-7b-5p	IFRD1	-0.395586	0
hsa-miR-100-5p	CHEK1	-0.395573	0
hsa-miR-29c-3p	PREP	-0.395525	0
hsa-miR-375-3p	PPP1R14C	-0.395391	0
hsa-miR-101-3p	CORO1C	-0.395349	0
hsa-miR-664a-5p	BIRC5	-0.395216	0
hsa-miR-101-3p	DNMT3B	-0.395189	0
hsa-miR-139-5p	STIP1	-0.395144	0
hsa-miR-218-5p	KIF20A	-0.395128	0
hsa-miR-34c-5p	KIF23	-0.394974	0
hsa-miR-29c-5p	LMO4	-0.394972	0
hsa-miR-29c-5p	IFRD1	-0.394923	0
hsa-miR-218-5p	CKS2	-0.394906	0
hsa-miR-30a-5p	RAN	-0.394874	0
hsa-let-7a-5p	STIP1	-0.394842	0
hsa-miR-139-5p	HJURP	-0.394814	0
hsa-miR-139-3p	SOX11	-0.394753	0
hsa-miR-30a-5p	EZH2	-0.394713	0
hsa-miR-195-3p	CCNE1	-0.394709	0
hsa-miR-29a-3p	CCNA2	-0.394655	0
hsa-miR-10b-3p	MCM6	-0.394625	0
hsa-miR-10a-5p	RAD51	-0.394568	0
hsa-miR-195-5p	PNO1	-0.394472	0
hsa-miR-190b-5p	CCNY	-0.394452	0
hsa-miR-10b-3p	CKS2	-0.394374	0
hsa-miR-375-3p	TIAM2	-0.394358	0
hsa-miR-10b-3p	PLK4	-0.39421	0
hsa-miR-199a-5p	UNG	-0.394209	0
hsa-let-7a-5p	RAP2B	-0.394132	0
hsa-miR-29b-2-5p	BAG2	-0.394072	0
hsa-miR-30c-2-3p	ACTR2	-0.39406	0
hsa-miR-342-3p	MRAS	-0.393985	0
hsa-miR-26a-5p	ATAD2	-0.393944	0
hsa-miR-10a-5p	POU4F1	-0.393886	4.72733e-12
hsa-miR-432-5p	FAM72B	-0.393885	0
hsa-miR-100-5p	HMGB3	-0.393859	0
hsa-miR-29b-2-5p	UBE2E2	-0.393796	0
hsa-miR-29b-2-5p	CDK2AP1	-0.39373	0
hsa-miR-190b-5p	DAZL	-0.393714	6.63913e-14
hsa-miR-30a-5p	CHAC1	-0.393683	0
hsa-miR-664a-3p	MCM6	-0.393633	0
hsa-miR-29b-2-5p	C2orf88	-0.393621	0
hsa-miR-100-5p	MTCH2	-0.393603	0
hsa-miR-30a-5p	NRBF2	-0.393585	0
hsa-miR-190b-5p	FAM135A	-0.393568	0
hsa-miR-29c-3p	HS2ST1	-0.39344	0
hsa-miR-30a-5p	EML4	-0.393389	0
hsa-miR-29b-2-5p	SLC30A3	-0.393376	0
hsa-miR-30a-3p	G6PD	-0.393374	0
hsa-miR-342-5p	RGMA	-0.393315	0
hsa-miR-10a-5p	LRP8	-0.393313	0
hsa-let-7a-5p	CCT5	-0.393282	0
hsa-miR-30c-2-3p	CHEK1	-0.393173	0
hsa-miR-29b-2-5p	SH3KBP1	-0.393142	0
hsa-miR-195-5p	GINS1	-0.393094	0
hsa-miR-218-5p	CCNA2	-0.392881	0
hsa-miR-190b-5p	TCF7L1	-0.392797	0
hsa-miR-139-3p	CCT5	-0.392788	0
hsa-miR-342-5p	SCHIP1	-0.392682	0
hsa-miR-218-5p	HJURP	-0.392665	0
hsa-miR-29b-2-5p	STAC2	-0.392652	0
hsa-miR-664a-5p	RAD51	-0.392643	0
hsa-miR-29c-5p	CDCA4	-0.392571	0
hsa-miR-218-5p	STIP1	-0.392524	0
hsa-miR-29c-3p	ZNF532	-0.392458	0
hsa-miR-29c-3p	RRP1B	-0.392457	0
hsa-miR-100-5p	FAM72B	-0.392425	0
hsa-miR-10a-5p	CHEK1	-0.39221	0
hsa-miR-29c-3p	GALNT1	-0.392204	0
hsa-miR-195-5p	HMGA1	-0.392182	0
hsa-miR-199a-5p	KIF20A	-0.392091	0
hsa-miR-29b-2-5p	TIAM2	-0.392032	0
hsa-miR-29c-3p	TBPL1	-0.39199	0
hsa-miR-30a-5p	CORO1C	-0.391987	0
hsa-miR-26a-5p	RAN	-0.391866	0
hsa-miR-29b-2-5p	EPHB1	-0.391838	0
hsa-miR-26a-5p	KCMF1	-0.391813	0
hsa-miR-29b-2-5p	ZDHHC18	-0.391809	0
hsa-miR-342-5p	STAC	-0.391806	0
hsa-miR-199a-5p	ELAVL1	-0.391792	0
hsa-miR-30a-5p	SURF4	-0.39166	0
hsa-miR-29b-2-5p	EPHB2	-0.391658	0
hsa-miR-190b-5p	NRBP1	-0.391594	0
hsa-miR-29c-5p	NMT2	-0.391592	0
hsa-miR-34c-5p	AMD1	-0.391473	0
hsa-miR-26a-5p	PEX13	-0.391366	0
hsa-miR-10b-3p	MCM2	-0.391345	0
hsa-miR-29c-5p	SLC10A3	-0.391314	0
hsa-miR-29c-3p	FAT1	-0.391297	0
hsa-miR-29b-2-5p	TLE4	-0.391235	0
hsa-miR-190b-5p	SPSB1	-0.391214	0
hsa-miR-195-5p	CCNF	-0.391196	0
hsa-miR-195-3p	HJURP	-0.391177	0
hsa-miR-29c-5p	NRBP1	-0.391128	0
hsa-miR-190b-5p	ADM	-0.391008	0
hsa-miR-139-5p	CCNA2	-0.390879	0
hsa-miR-10b-3p	CCT5	-0.390855	0
hsa-let-7b-5p	TMEM138	-0.390728	0
hsa-miR-30a-3p	EZH2	-0.390702	0
hsa-miR-26a-5p	MED14	-0.390689	0
hsa-miR-29a-3p	PLK4	-0.390681	0
hsa-miR-342-5p	ISL2	-0.390635	6.21725e-15
hsa-miR-190b-5p	TLE4	-0.390605	0
hsa-miR-29c-5p	RBMS1	-0.39056	0
hsa-miR-29c-3p	CEP170	-0.390554	0
hsa-miR-29c-5p	MET	-0.390549	0
hsa-miR-29c-3p	MAPK14	-0.390505	0
hsa-miR-99a-5p	WDR76	-0.390488	0
hsa-miR-26a-5p	OPA1	-0.390416	0
hsa-miR-29c-5p	BCL11B	-0.390394	0
hsa-miR-101-3p	ACTR2	-0.390387	0
hsa-miR-100-5p	HSPD1	-0.390338	0
hsa-miR-26a-5p	LDHA	-0.390301	0
hsa-miR-190b-5p	EXT1	-0.39021	0
hsa-miR-199a-5p	CHEK1	-0.390149	0
hsa-miR-190b-5p	GPX7	-0.39003	0
hsa-miR-10b-5p	MDGA2	-0.389912	3.98657e-11
hsa-miR-337-3p	CDC25A	-0.389908	0
hsa-miR-190b-5p	TTYH1	-0.389899	0
hsa-miR-342-5p	MPZL2	-0.389883	0
hsa-miR-218-5p	GINS1	-0.389831	0
hsa-let-7a-5p	LRP8	-0.389707	0
hsa-miR-99a-5p	CCNF	-0.389697	0
hsa-miR-337-3p	BIRC5	-0.389676	0
hsa-let-7b-5p	HNRNPAB	-0.389661	0
hsa-miR-432-5p	ZNF367	-0.389656	0
hsa-miR-139-5p	BIRC5	-0.389644	0
hsa-miR-30a-5p	RAP2B	-0.389625	0
hsa-miR-664a-3p	MTHFD1L	-0.3896	0
hsa-miR-30c-2-3p	FAM136A	-0.389547	0
hsa-miR-29c-3p	PLOD2	-0.389538	0
hsa-miR-29a-3p	POLQ	-0.389526	0
hsa-miR-99a-5p	MCM2	-0.389397	0
hsa-miR-139-5p	HSPD1	-0.389332	0
hsa-miR-29c-3p	CKS2	-0.389238	0
hsa-miR-195-5p	TRIM59	-0.389202	0
hsa-miR-337-3p	POU4F1	-0.389196	8.85314e-12
hsa-miR-30c-2-3p	PSMA4	-0.389189	0
hsa-miR-139-3p	GINS1	-0.389188	0
hsa-miR-29b-2-5p	PELI1	-0.38908	0
hsa-miR-29c-5p	SCHIP1	-0.389077	0
hsa-miR-218-5p	MTBP	-0.388976	0
hsa-miR-29b-2-5p	TNFAIP3	-0.388969	0
hsa-miR-99a-5p	ATAD2	-0.388939	0
hsa-miR-29c-3p	SEPHS1	-0.388934	0
hsa-miR-30c-2-3p	CBFB	-0.388928	0
hsa-miR-29c-5p	C15orf39	-0.388915	0
hsa-let-7b-5p	A2ML1	-0.388851	0
hsa-miR-10b-5p	POLQ	-0.388785	0
hsa-miR-30a-5p	XPO5	-0.388762	0
hsa-miR-195-5p	FAM72B	-0.388758	0
hsa-miR-26a-5p	RAB1A	-0.388654	0
hsa-miR-199b-5p	GINS1	-0.388623	0
hsa-miR-26a-5p	SF3B3	-0.388542	0
hsa-miR-195-5p	EZH2	-0.388478	0
hsa-miR-30a-3p	LMNB1	-0.388478	0
hsa-miR-139-5p	CCT5	-0.388447	0
hsa-miR-190b-5p	ZDHHC18	-0.388399	0
hsa-miR-145-3p	CDC25A	-0.388362	0
hsa-miR-342-3p	CHST3	-0.388187	0
hsa-miR-30c-2-3p	YWHAG	-0.388073	0
hsa-miR-195-3p	PSMC2	-0.388017	0
hsa-let-7b-5p	HSPE1	-0.387993	0
hsa-miR-190b-5p	FAM126A	-0.38796	0
hsa-miR-29c-3p	PNO1	-0.387889	0
hsa-miR-100-5p	EZH2	-0.387878	0
hsa-miR-190b-5p	LIMD2	-0.387853	0
hsa-miR-342-3p	AGPAT4	-0.387808	0
hsa-let-7a-5p	C16orf87	-0.387704	0
hsa-miR-432-5p	RAD21	-0.387696	0
hsa-miR-139-5p	KPNA2	-0.38768	0
hsa-miR-29a-3p	E2F7	-0.387664	0
hsa-miR-342-5p	ST8SIA1	-0.387546	0
hsa-miR-195-5p	SLC7A5	-0.38754	0
hsa-miR-29b-2-5p	VASN	-0.387529	0
hsa-miR-199a-5p	RAD51	-0.387517	0
hsa-miR-342-5p	SLC7A5	-0.387511	0
hsa-miR-342-5p	TCF7L1	-0.387504	0
hsa-miR-100-5p	ZNF367	-0.387395	0
hsa-miR-375-3p	FSCN1	-0.387356	0
hsa-miR-375-3p	MTHFD1L	-0.387209	0
hsa-let-7b-5p	PDE7A	-0.38719	0
hsa-let-7a-5p	HMGB3	-0.387126	0
hsa-miR-199b-5p	FAM136A	-0.387023	0
hsa-miR-29b-2-5p	SPSB1	-0.386789	0
hsa-miR-139-3p	CKS2	-0.386762	0
hsa-miR-190b-5p	ACTR3	-0.386735	0
hsa-miR-379-5p	HJURP	-0.386722	0
hsa-miR-30c-2-3p	RAN	-0.386704	0
hsa-miR-29c-3p	FNDC3B	-0.386701	0
hsa-miR-99a-5p	HSPE1	-0.38668	0
hsa-miR-195-5p	ESRP1	-0.386614	0
hsa-miR-190b-5p	GTPBP8	-0.386555	0
hsa-miR-29b-2-5p	CPA4	-0.386535	0
hsa-miR-29b-2-5p	C15orf39	-0.386452	0
hsa-miR-29b-2-5p	ACTN1	-0.386448	0
hsa-miR-30c-2-3p	CKS2	-0.386441	0
hsa-miR-342-5p	MET	-0.386386	0
hsa-miR-29c-5p	CX3CL1	-0.386381	0
hsa-miR-190b-5p	PRKCQ	-0.386221	0
hsa-miR-199a-5p	ZNF367	-0.386216	0
hsa-miR-29b-2-5p	GATA6	-0.386213	0
hsa-miR-30a-3p	YBX1	-0.386186	0
hsa-miR-218-5p	BIRC5	-0.386162	0
hsa-miR-29c-5p	NFIB	-0.386153	0
hsa-miR-30a-3p	FAM136A	-0.386101	0
hsa-miR-29c-3p	FAM72B	-0.386083	0
hsa-miR-29b-2-5p	PRICKLE1	-0.385993	0
hsa-miR-29c-5p	FZD7	-0.385975	0
hsa-miR-29c-5p	ITPRIP	-0.385932	0
hsa-miR-10b-5p	KIF23	-0.385904	0
hsa-miR-190b-5p	TIAM2	-0.385723	0
hsa-miR-29b-2-5p	MEX3A	-0.385632	0
hsa-miR-199a-5p	ESRP1	-0.385589	0
hsa-miR-100-5p	PBK	-0.385557	0
hsa-miR-190b-5p	KLF5	-0.385515	0
hsa-miR-199b-5p	UNG	-0.385509	0
hsa-miR-30a-5p	DYRK2	-0.38547	0
hsa-miR-29c-5p	DDIT4	-0.385467	0
hsa-miR-29c-5p	DGKZ	-0.385424	0
hsa-let-7b-5p	IGF2BP3	-0.385424	0
hsa-miR-195-3p	HMGA1	-0.385394	0
hsa-miR-30c-2-3p	GCH1	-0.38539	0
hsa-miR-34c-5p	KIF20A	-0.385351	0
hsa-miR-29b-2-5p	AMOTL1	-0.385285	0
hsa-miR-101-3p	YWHAZ	-0.385226	0
hsa-miR-101-3p	CHORDC1	-0.385207	0
hsa-miR-29c-5p	PDXK	-0.385161	0
hsa-miR-29c-5p	ID4	-0.385153	0
hsa-miR-190b-5p	CHAC1	-0.385088	0
hsa-miR-342-5p	RAP2B	-0.384919	0
hsa-miR-199a-5p	CABLES2	-0.384711	0
hsa-miR-29c-3p	CHRNA5	-0.384709	0
hsa-let-7b-3p	CCNE1	-0.384676	0
hsa-miR-101-3p	LMNB1	-0.384549	0
hsa-miR-30a-5p	R3HDM1	-0.384505	0
hsa-miR-26a-5p	NLN	-0.384479	0
hsa-miR-10b-5p	KPNA2	-0.38439	0
hsa-miR-342-5p	IGF2BP2	-0.384359	0
hsa-miR-199b-5p	E2F7	-0.384342	0
hsa-miR-190b-5p	ZIC1	-0.38433	0
hsa-miR-29b-2-5p	SERPINB5	-0.384329	0
hsa-miR-342-5p	GATA6	-0.384219	0
hsa-miR-29b-2-5p	ETS2	-0.384173	0
hsa-miR-26a-5p	TDG	-0.38416	0
hsa-miR-29c-5p	KCNS1	-0.384123	0
hsa-miR-30c-2-3p	HPSE	-0.384091	0
hsa-miR-195-3p	CCNA2	-0.38403	0
hsa-miR-100-5p	BIRC5	-0.383941	0
hsa-miR-10b-5p	PBK	-0.383906	0
hsa-miR-139-3p	KIF20A	-0.383735	0
hsa-miR-30a-3p	GINS1	-0.383667	0
hsa-miR-34c-5p	FAM98A	-0.38346	0
hsa-miR-375-3p	ITPRIP	-0.383421	0
hsa-miR-29c-5p	RASGRF1	-0.383401	0
hsa-miR-30a-3p	TMEM65	-0.38335	0
hsa-miR-29c-3p	WWTR1	-0.383303	0
hsa-miR-337-3p	FAM72B	-0.383276	0
hsa-miR-29c-3p	PLS3	-0.38305	0
hsa-miR-375-3p	SRF	-0.383034	0
hsa-miR-30a-5p	MAPRE1	-0.383033	0
hsa-miR-342-3p	FOSL1	-0.383025	0
hsa-miR-30a-5p	PNO1	-0.382931	0
hsa-miR-10b-3p	XPO5	-0.382908	0
hsa-miR-218-5p	BTF3L4	-0.382841	0
hsa-miR-30a-5p	SF3B3	-0.382798	0
hsa-miR-29b-2-5p	DAZAP1	-0.382738	0
hsa-let-7a-5p	PDE7A	-0.382706	0
hsa-miR-342-3p	MTHFD1L	-0.382519	0
hsa-miR-29a-3p	CCNE2	-0.382484	0
hsa-miR-190b-5p	INA	-0.38244	0
hsa-miR-190b-5p	CTLA4	-0.382393	0
hsa-miR-29c-5p	ZDHHC18	-0.382368	0
hsa-miR-10a-5p	CCNE1	-0.382318	0
hsa-miR-190b-5p	CBFB	-0.382266	0
hsa-let-7a-5p	HMGA1	-0.382188	0
hsa-miR-30a-5p	HPSE	-0.382149	0
hsa-miR-100-5p	KPNA2	-0.382136	0
hsa-miR-375-3p	EPHB6	-0.382111	0
hsa-let-7b-3p	PFN1	-0.382101	0
hsa-miR-30a-5p	TDG	-0.382074	0
hsa-miR-190b-5p	TNFAIP3	-0.38203	0
hsa-miR-190b-5p	ZC3H12C	-0.382019	0
hsa-miR-34c-5p	CCT5	-0.382003	0
hsa-miR-342-5p	JRKL	-0.381957	0
hsa-miR-29c-3p	RLF	-0.381894	0
hsa-miR-30a-3p	MTHFD1L	-0.381866	0
hsa-miR-30a-5p	A2ML1	-0.38186	0
hsa-miR-190b-5p	FNDC3B	-0.381818	0
hsa-miR-10a-5p	SLC7A5	-0.381818	0
hsa-miR-342-5p	ADM	-0.381779	0
hsa-let-7a-5p	RHEB	-0.381771	0
hsa-miR-139-3p	NETO1	-0.381722	0
hsa-miR-195-5p	LRP8	-0.381685	0
hsa-miR-375-3p	ADAT2	-0.381675	0
hsa-miR-26b-5p	SLC7A5	-0.381656	0
hsa-miR-30c-2-3p	NRBP1	-0.381652	0
hsa-miR-29c-3p	NAA15	-0.381612	0
hsa-miR-337-3p	HJURP	-0.381554	0
hsa-miR-10b-5p	MCM6	-0.381501	0
hsa-miR-34c-5p	BTF3L4	-0.381488	0
hsa-miR-29c-3p	ATP2C1	-0.381479	0
hsa-miR-379-5p	CCNA2	-0.381424	0
hsa-miR-30c-2-3p	TDG	-0.381338	0
hsa-let-7a-5p	CLCN5	-0.381334	0
hsa-miR-139-5p	MCM6	-0.381251	0
hsa-miR-139-3p	HAPLN1	-0.381218	0
hsa-miR-30a-5p	IGF2BP3	-0.381207	0
hsa-miR-190b-5p	EPHB2	-0.38113	0
hsa-miR-190b-5p	PRICKLE1	-0.381058	0
hsa-miR-342-5p	NFIB	-0.380977	0
hsa-miR-29a-3p	HJURP	-0.380934	0
hsa-miR-29b-2-5p	PLS3	-0.380701	0
hsa-miR-34c-5p	TAF5	-0.380656	0
hsa-miR-29c-3p	LRP8	-0.380646	0
hsa-miR-195-5p	KPNA4	-0.380581	0
hsa-miR-29c-3p	ACTR2	-0.380556	0
hsa-miR-342-5p	DDIT4	-0.380538	0
hsa-miR-30a-5p	CHEK1	-0.380522	0
hsa-miR-195-5p	BTF3L4	-0.38051	0
hsa-miR-101-3p	PLOD2	-0.380295	0
hsa-miR-29c-3p	TTLL4	-0.380192	0
hsa-miR-10b-3p	HSPD1	-0.380116	0
hsa-miR-195-3p	GMPS	-0.380038	0
hsa-miR-101-3p	STIP1	-0.379992	0
hsa-miR-29c-5p	RGS20	-0.379938	0
hsa-miR-204-5p	ESRP1	-0.379908	0
hsa-miR-101-3p	ESRP1	-0.379852	0
hsa-miR-30a-3p	PSMB5	-0.379817	0
hsa-miR-29c-5p	KHDRBS3	-0.379807	0
hsa-miR-101-3p	CCNE2	-0.379804	0
hsa-let-7b-3p	LIMD2	-0.37977	0
hsa-miR-29c-3p	SOX4	-0.379738	0
hsa-miR-195-5p	PDCD10	-0.379736	0
hsa-miR-29b-2-5p	PREP	-0.379682	0
hsa-miR-139-5p	EIF2S2	-0.3796	0
hsa-miR-199b-5p	ELAVL1	-0.379546	0
hsa-miR-29c-3p	USP1	-0.379507	0
hsa-miR-195-3p	RAN	-0.379453	0
hsa-miR-195-3p	YWHAZ	-0.379447	0
hsa-miR-26a-5p	C16orf87	-0.379382	0
hsa-miR-375-3p	FOSL1	-0.379374	0
hsa-miR-342-5p	LANCL3	-0.379351	0
hsa-miR-199a-5p	ME2	-0.379247	0
hsa-miR-26a-5p	ABCE1	-0.379211	0
hsa-miR-199a-5p	BTF3L4	-0.379207	0
hsa-miR-29c-5p	KCNN4	-0.37917	0
hsa-miR-29b-2-5p	QKI	-0.379122	0
hsa-miR-29b-2-5p	KLF11	-0.379107	0
hsa-miR-30c-2-3p	PNO1	-0.379064	0
hsa-miR-218-5p	ARMC1	-0.379048	0
hsa-miR-195-5p	SOX11	-0.378951	0
hsa-miR-10b-3p	USP1	-0.378914	0
hsa-miR-100-5p	GINS1	-0.378913	0
hsa-miR-30a-5p	SOX11	-0.378898	0
hsa-miR-26a-5p	STAU1	-0.378893	0
hsa-miR-34c-5p	NAA50	-0.378864	0
hsa-miR-30a-3p	KIF23	-0.378837	0
hsa-let-7b-3p	TIMM17B	-0.378782	0
hsa-miR-30c-2-3p	PLK4	-0.378776	0
hsa-miR-342-5p	ART3	-0.378763	0
hsa-let-7a-5p	NRBF2	-0.378742	0
hsa-miR-218-5p	PDHX	-0.37874	0
hsa-let-7b-5p	TPD52L2	-0.378672	0
hsa-miR-26a-5p	UBE2V2	-0.378671	0
hsa-miR-30a-5p	HSPD1	-0.378632	0
hsa-miR-29c-3p	CCNYL1	-0.378609	0
hsa-miR-29c-3p	ABCE1	-0.378594	0
hsa-miR-139-5p	EZH2	-0.37859	0
hsa-miR-29c-3p	SH3GL3	-0.378583	4.01901e-14
hsa-miR-29c-3p	LRP12	-0.378572	0
hsa-miR-30a-5p	MTHFD1L	-0.378566	0
hsa-let-7b-5p	NASP	-0.378474	0
hsa-miR-190b-5p	RDH10	-0.378392	0
hsa-miR-26a-5p	GINS3	-0.378377	0
hsa-miR-26a-5p	LMNB1	-0.378365	0
hsa-miR-30a-3p	CCT5	-0.378286	0
hsa-miR-190a-5p	KPNA2	-0.378211	0
hsa-miR-26a-5p	CHORDC1	-0.378171	0
hsa-miR-29b-2-5p	COMMD2	-0.378123	0
hsa-miR-34c-5p	MCM6	-0.378121	0
hsa-let-7b-3p	HMGA1	-0.3781	0
hsa-miR-342-5p	RIMS3	-0.378081	0
hsa-miR-34c-5p	RAN	-0.378	0
hsa-miR-29c-3p	RAP2B	-0.377928	0
hsa-miR-29b-2-5p	TCF7L2	-0.377884	0
hsa-miR-101-3p	LRP8	-0.377856	0
hsa-miR-342-5p	PRKX	-0.377804	0
hsa-miR-199b-5p	E2F5	-0.377778	0
hsa-miR-101-3p	PBK	-0.377773	0
hsa-miR-190b-5p	CDK2AP1	-0.377654	0
hsa-miR-139-3p	CCNA2	-0.377598	0
hsa-miR-29c-3p	DZIP1	-0.377566	0
hsa-miR-26a-5p	TFRC	-0.37752	0
hsa-miR-34c-5p	R3HDM1	-0.377494	0
hsa-miR-30a-5p	PDIA6	-0.37741	0
hsa-let-7b-5p	KIF23	-0.377386	0
hsa-miR-190b-5p	PDK1	-0.377336	0
hsa-miR-375-3p	DZIP1	-0.377309	0
hsa-miR-29c-3p	SLC16A10	-0.377279	0
hsa-miR-101-3p	CASP3	-0.377269	0
hsa-miR-100-5p	CCNF	-0.377267	0
hsa-miR-139-3p	LDHA	-0.377248	0
hsa-miR-29c-5p	ADAMTS3	-0.377248	0
hsa-miR-101-3p	GINS3	-0.377157	0
hsa-miR-26a-5p	SOX11	-0.37712	0
hsa-let-7b-5p	CLCN5	-0.377108	0
hsa-miR-664a-3p	CCNE1	-0.37708	0
hsa-miR-342-3p	B3GNT5	-0.377069	0
hsa-miR-195-3p	FAM72B	-0.376995	0
hsa-miR-195-3p	HSPD1	-0.376902	0
hsa-miR-29c-3p	BTF3L4	-0.376874	0
hsa-miR-29a-3p	XPO1	-0.376803	0
hsa-miR-199b-5p	BTF3L4	-0.376748	0
hsa-miR-190b-5p	PRRG1	-0.376661	0
hsa-miR-145-3p	CKS2	-0.376595	0
hsa-miR-199a-5p	MCM2	-0.376569	0
hsa-miR-139-5p	XPO5	-0.376547	0
hsa-miR-375-3p	DMD	-0.376528	0
hsa-miR-29c-5p	PPARGC1B	-0.376526	0
hsa-miR-30a-5p	UBE2V2	-0.376511	0
hsa-miR-29c-5p	SLC6A14	-0.376494	0
hsa-miR-29b-2-5p	TMOD1	-0.376489	0
hsa-miR-195-3p	KCMF1	-0.376429	0
hsa-miR-199b-5p	RAN	-0.376367	0
hsa-miR-190b-5p	WDR43	-0.376354	0
hsa-miR-26a-5p	ACTR3	-0.376349	0
hsa-miR-29c-3p	PDIA6	-0.376336	0
hsa-miR-29c-5p	HMGA1	-0.376293	0
hsa-miR-342-5p	MAP2K3	-0.37628	0
hsa-miR-99a-5p	RAN	-0.376161	0
hsa-miR-29b-2-5p	RYR3	-0.376084	0
hsa-miR-29b-2-5p	DDIT4	-0.376073	0
hsa-miR-218-5p	NAA50	-0.37607	0
hsa-miR-342-5p	RBMS1	-0.375999	0
hsa-miR-342-5p	KCNQ4	-0.375995	0
hsa-miR-664a-3p	RELT	-0.375963	0
hsa-miR-26a-5p	PSMC2	-0.375934	0
hsa-miR-664a-5p	HJURP	-0.375904	0
hsa-miR-139-5p	RAN	-0.375857	0
hsa-miR-29c-3p	PRKD3	-0.375823	0
hsa-miR-664a-3p	INCENP	-0.375808	0
hsa-miR-195-3p	CKS2	-0.375802	0
hsa-miR-26a-5p	ZC3H15	-0.375755	0
hsa-miR-342-5p	GABBR2	-0.375753	4.44089e-16
hsa-miR-30a-5p	CHRNA5	-0.375696	0
hsa-miR-29c-5p	C2orf88	-0.375693	0
hsa-miR-218-5p	RAD51	-0.375604	0
hsa-miR-190b-5p	NXPH4	-0.375543	0
hsa-miR-30a-5p	ZC3H15	-0.375488	0
hsa-miR-29b-2-5p	ANKRD11	-0.375429	0
hsa-miR-190b-5p	SMOC1	-0.375411	0
hsa-miR-342-5p	VASN	-0.375406	0
hsa-miR-10b-3p	GINS1	-0.375343	0
hsa-miR-30a-3p	POLQ	-0.375331	0
hsa-miR-30a-5p	GOLT1B	-0.375322	0
hsa-miR-99a-5p	STIP1	-0.375311	0
hsa-miR-342-3p	TNFRSF21	-0.375286	0
hsa-miR-29c-5p	PRKCQ	-0.375276	0
hsa-miR-664a-3p	CCNA2	-0.375186	0
hsa-miR-664a-3p	RAP2B	-0.37515	0
hsa-miR-29c-5p	TFEB	-0.375139	0
hsa-miR-139-5p	SMS	-0.375132	0
hsa-miR-29c-3p	GOLT1B	-0.375126	0
hsa-miR-30c-2-3p	INTS8	-0.375102	0
hsa-miR-99a-5p	TIMELESS	-0.375097	0
hsa-miR-29a-3p	CLTC	-0.375093	0
hsa-miR-337-3p	EZH2	-0.375074	0
hsa-miR-29c-5p	STAC2	-0.375054	0
hsa-miR-375-3p	RBMS1	-0.37496	0
hsa-miR-375-3p	NCOA7	-0.374932	0
hsa-miR-139-5p	FAM72B	-0.374882	0
hsa-miR-218-5p	MTCH2	-0.374872	0
hsa-miR-29c-3p	JOSD1	-0.374859	0
hsa-miR-139-3p	HJURP	-0.374844	0
hsa-miR-26a-5p	TET3	-0.374831	0
hsa-miR-101-3p	TIMM8A	-0.374819	0
hsa-miR-100-5p	CCNA2	-0.374807	0
hsa-miR-375-3p	TUBB6	-0.374772	0
hsa-miR-100-5p	POLQ	-0.374745	0
hsa-let-7a-5p	ACTR3	-0.374708	0
hsa-miR-29c-5p	SNAI1	-0.374681	0
hsa-miR-29c-3p	ASAP1	-0.374668	0
hsa-miR-342-3p	SLC7A5	-0.374632	0
hsa-miR-101-3p	UBE2V1	-0.374627	0
hsa-miR-26a-5p	DCUN1D1	-0.374595	0
hsa-miR-30a-5p	PSMA4	-0.37449	0
hsa-miR-139-5p	YWHAZ	-0.374469	0
hsa-miR-139-3p	HSPD1	-0.374459	0
hsa-miR-30c-2-3p	SNRPB2	-0.374409	0
hsa-miR-29c-3p	FKBP14	-0.374343	0
hsa-miR-29c-5p	KCNQ4	-0.374337	0
hsa-miR-199a-5p	CCNE2	-0.374313	0
hsa-miR-101-3p	MDGA2	-0.374308	2.63702e-10
hsa-miR-10b-5p	CIT	-0.374292	0
hsa-miR-101-3p	PDIA6	-0.37428	0
hsa-miR-342-3p	CCNE1	-0.374116	0
hsa-miR-30c-2-3p	KCTD5	-0.373926	0
hsa-miR-664a-5p	RAP2B	-0.373847	0
hsa-miR-199a-5p	HSPD1	-0.373842	0
hsa-miR-218-5p	FAM72B	-0.373816	0
hsa-miR-29a-3p	RAD51	-0.373805	0
hsa-miR-34c-5p	STIP1	-0.373765	0
hsa-miR-29b-2-5p	GPR3	-0.373757	0
hsa-miR-204-5p	STIP1	-0.37371	0
hsa-miR-29c-3p	E2F7	-0.373693	0
hsa-miR-29a-3p	SMC2	-0.373616	0
hsa-let-7b-3p	FBRSL1	-0.373586	0
hsa-miR-664a-3p	KIF20A	-0.373552	0
hsa-miR-30a-5p	ONECUT2	-0.373515	0
hsa-miR-29c-5p	ZIC1	-0.373483	0
hsa-miR-139-3p	KPNA2	-0.373423	0
hsa-miR-30a-5p	CLCN5	-0.373412	0
hsa-miR-29b-2-5p	ADAMTS9	-0.373333	0
hsa-miR-190b-5p	YES1	-0.373323	0
hsa-miR-30c-2-3p	CABLES2	-0.373251	0
hsa-miR-101-3p	HDAC2	-0.373208	0
hsa-miR-101-3p	INTS8	-0.373201	0
hsa-miR-29c-5p	ANKRD11	-0.373201	0
hsa-miR-375-3p	ACTN1	-0.373187	0
hsa-miR-30a-5p	CKS2	-0.373173	0
hsa-miR-139-5p	GJB2	-0.373113	0
hsa-miR-139-3p	XPO5	-0.373099	0
hsa-miR-29c-5p	TTYH1	-0.373053	0
hsa-miR-190a-5p	GMPS	-0.373038	0
hsa-miR-199a-5p	PLK4	-0.373025	0
hsa-miR-375-3p	MPZL2	-0.372996	0
hsa-let-7b-3p	SLC7A5	-0.372931	0
hsa-miR-342-3p	A2ML1	-0.372886	0
hsa-miR-375-3p	JOSD1	-0.372869	0
hsa-miR-190b-5p	MAPRE2	-0.37284	0
hsa-miR-29c-5p	TTLL4	-0.372801	0
hsa-miR-218-5p	ME2	-0.372754	0
hsa-miR-139-5p	SOX11	-0.372702	0
hsa-miR-29b-2-5p	ADCY7	-0.372682	0
hsa-miR-342-5p	LRIG3	-0.372643	0
hsa-let-7b-5p	PSMC2	-0.372638	0
hsa-let-7b-5p	MCM6	-0.372609	0
hsa-miR-30c-2-3p	PDIA6	-0.372604	0
hsa-miR-29c-5p	TMOD1	-0.372586	0
hsa-miR-139-3p	KIF23	-0.37253	0
hsa-miR-26a-5p	BTF3L4	-0.372469	0
hsa-let-7b-5p	KCMF1	-0.372467	0
hsa-let-7b-5p	MTHFD1L	-0.372466	0
hsa-miR-30c-2-3p	RAP2B	-0.372424	0
hsa-miR-199a-5p	KIF23	-0.372399	0
hsa-miR-30c-2-3p	CCNF	-0.372391	0
hsa-miR-218-5p	MAPRE1	-0.37238	0
hsa-miR-145-3p	BIRC5	-0.372355	0
hsa-miR-99a-5p	EIF2S2	-0.372352	0
hsa-miR-26a-5p	PDIA6	-0.372343	0
hsa-miR-26a-5p	MTMR2	-0.372272	0
hsa-miR-10b-5p	SLC7A5	-0.372219	0
hsa-miR-29b-2-5p	TOX	-0.372209	0
hsa-miR-29c-3p	KPNA3	-0.372208	0
hsa-miR-190b-5p	ME1	-0.372204	0
hsa-miR-10b-3p	CCDC77	-0.37213	0
hsa-miR-101-3p	KCTD5	-0.372128	0
hsa-miR-30a-3p	MCM6	-0.37203	0
hsa-miR-342-5p	CX3CL1	-0.371944	0
hsa-miR-199b-5p	SLBP	-0.371891	0
hsa-miR-29b-2-5p	KCMF1	-0.371856	0
hsa-miR-29c-5p	GATA6	-0.371848	0
hsa-miR-139-5p	LMNB1	-0.37175	0
hsa-miR-342-5p	CORO1C	-0.371666	0
hsa-miR-29b-2-5p	RIMS3	-0.371653	0
hsa-miR-190b-5p	PITPNM2	-0.371609	0
hsa-miR-195-3p	CDC25A	-0.37159	0
hsa-miR-195-5p	FAM98A	-0.371534	0
hsa-miR-101-3p	SURF4	-0.371483	0
hsa-miR-29b-2-5p	PDXK	-0.371436	0
hsa-miR-101-3p	SMC6	-0.371402	0
hsa-miR-139-5p	CHORDC1	-0.371351	0
hsa-miR-26a-5p	WDR43	-0.371337	0
hsa-miR-664a-5p	KIF20A	-0.371327	0
hsa-miR-29b-2-5p	COL4A4	-0.371285	0
hsa-miR-190b-5p	PPARA	-0.371249	0
hsa-miR-195-5p	MCM2	-0.371242	0
hsa-miR-342-3p	BTG3	-0.371216	0
hsa-let-7b-3p	PCBP4	-0.371165	0
hsa-miR-29b-2-5p	SLC7A5	-0.371092	0
hsa-miR-432-5p	ATAD2	-0.371077	0
hsa-miR-664a-5p	SLC16A10	-0.371061	0
hsa-miR-664a-3p	CDC25A	-0.371021	0
hsa-miR-29c-5p	GPR3	-0.370982	0
hsa-miR-34c-5p	CCNE2	-0.370924	0
hsa-miR-101-3p	PNO1	-0.370899	0
hsa-miR-199b-5p	CCT5	-0.370897	0
hsa-miR-100-5p	RAD51	-0.370871	0
hsa-miR-30a-5p	PLK4	-0.370828	0
hsa-miR-101-5p	NRBP1	-0.370806	0
hsa-miR-30a-5p	HMGB3	-0.370802	0
hsa-miR-30a-3p	DPYSL5	-0.370695	5.85443e-12
hsa-miR-190b-5p	MAP2K3	-0.370604	0
hsa-miR-190b-5p	KBTBD8	-0.37059	0
hsa-miR-10a-5p	KIF20A	-0.370588	0
hsa-miR-190b-5p	ZIC4	-0.370583	2.22045e-16
hsa-miR-204-5p	HSPD1	-0.370554	0
hsa-miR-139-5p	MCM2	-0.370545	0
hsa-miR-29c-5p	PRKD3	-0.370491	0
hsa-miR-99a-5p	E2F7	-0.370456	0
hsa-miR-218-5p	DNM1L	-0.370433	0
hsa-let-7a-5p	DCUN1D5	-0.370409	0
hsa-miR-195-3p	PDIA6	-0.370379	0
hsa-miR-26a-5p	PBK	-0.370377	0
hsa-miR-29b-2-5p	ADAT2	-0.370367	0
hsa-miR-379-5p	CKS2	-0.370359	0
hsa-miR-29c-3p	EXT1	-0.370319	0
hsa-miR-139-5p	CCNE2	-0.370308	0
hsa-miR-190b-5p	SLC16A1	-0.370254	0
hsa-miR-26a-5p	ARMC1	-0.370229	0
hsa-miR-342-5p	FMNL2	-0.370208	0
hsa-miR-29c-3p	UBE2E3	-0.370156	0
hsa-miR-26a-5p	CKS2	-0.370151	0
hsa-miR-342-3p	CIB2	-0.370127	0
hsa-miR-29b-2-5p	ZIC4	-0.370091	2.22045e-16
hsa-miR-190b-5p	POU2F2	-0.370048	0
hsa-miR-379-5p	EZH2	-0.370018	0
hsa-miR-30c-2-3p	MCM2	-0.370017	0
hsa-let-7b-3p	NASP	-0.369993	0
hsa-miR-190b-5p	KHDRBS3	-0.369989	0
hsa-let-7a-5p	TMEM65	-0.369794	0
hsa-miR-379-5p	BIRC5	-0.369784	0
hsa-miR-26a-5p	DOCK7	-0.369636	0
hsa-miR-195-5p	RAB1A	-0.369606	0
hsa-miR-375-3p	CORO1C	-0.369528	0
hsa-let-7a-5p	XPO5	-0.369505	0
hsa-miR-664a-5p	SLC7A5	-0.369357	0
hsa-miR-29c-3p	INTS8	-0.369296	0
hsa-miR-139-3p	CDC25A	-0.369291	0
hsa-miR-30c-2-3p	RPN1	-0.36927	0
hsa-miR-30c-2-3p	CORO1C	-0.369212	0
hsa-miR-29c-5p	LBR	-0.369168	0
hsa-miR-101-3p	ME1	-0.369155	0
hsa-miR-432-5p	HJURP	-0.369132	0
hsa-miR-29b-2-5p	ZNRF1	-0.369118	0
hsa-miR-10b-3p	HDAC2	-0.369098	0
hsa-miR-34c-5p	CKS2	-0.369063	0
hsa-miR-375-3p	RDH10	-0.368993	0
hsa-miR-218-5p	TIMELESS	-0.368974	0
hsa-miR-664a-5p	CDC25A	-0.368966	0
hsa-miR-29b-2-5p	ISL2	-0.368811	2.29816e-13
hsa-miR-432-5p	PBK	-0.3688	0
hsa-miR-30a-5p	TIMM8A	-0.368758	0
hsa-miR-190b-5p	SF3B3	-0.368746	0
hsa-miR-342-5p	TTYH1	-0.368655	0
hsa-miR-432-5p	SLBP	-0.368641	0
hsa-miR-101-3p	HIF1A	-0.3686	0
hsa-miR-139-5p	KIF23	-0.368576	0
hsa-miR-101-3p	STAU1	-0.368446	0
hsa-miR-190b-5p	UGT8	-0.368409	0
hsa-miR-29c-5p	SOD2	-0.368402	0
hsa-miR-29c-5p	ACTN1	-0.368402	0
hsa-miR-30a-5p	YBX1	-0.368327	0
hsa-miR-139-3p	FAM72B	-0.368321	0
hsa-miR-664a-5p	MCM6	-0.368304	0
hsa-miR-139-3p	HDAC2	-0.368265	0
hsa-miR-29c-5p	ZNRF1	-0.368207	0
hsa-let-7b-5p	ADAT2	-0.36808	0
hsa-miR-34c-5p	TRIM59	-0.368077	0
hsa-miR-190b-5p	E2F3	-0.368034	0
hsa-miR-34c-5p	HMGB3	-0.367967	0
hsa-miR-101-5p	TTYH3	-0.367887	0
hsa-let-7b-5p	CCT5	-0.367832	0
hsa-miR-30c-2-3p	R3HDM1	-0.367797	0
hsa-miR-29c-3p	JRKL	-0.367778	0
hsa-miR-190b-5p	DNMT3B	-0.36777	0
hsa-let-7a-5p	SOX11	-0.367739	0
hsa-miR-30c-2-3p	ZC3H15	-0.367676	0
hsa-miR-29a-3p	GMPS	-0.367646	0
hsa-miR-218-5p	MCM2	-0.367631	0
hsa-miR-34c-5p	GPR180	-0.367599	0
hsa-miR-26a-5p	GSK3B	-0.367572	0
hsa-let-7a-5p	CDK8	-0.367558	0
hsa-miR-139-5p	RAD51	-0.367519	0
hsa-miR-190b-5p	SLC6A15	-0.367473	4.88498e-15
hsa-miR-101-3p	R3HDM1	-0.367444	0
hsa-miR-10b-3p	LMNB1	-0.36732	0
hsa-miR-99a-5p	CCT5	-0.367263	0
hsa-miR-30c-2-3p	UBE2V2	-0.367263	0
hsa-miR-29c-3p	DNMT3A	-0.36725	0
hsa-miR-342-3p	FOXC1	-0.367213	0
hsa-miR-195-5p	CCNE2	-0.367175	0
hsa-miR-29c-3p	MPZL1	-0.367154	0
hsa-miR-26a-5p	USP1	-0.367145	0
hsa-miR-29c-3p	RECQL	-0.367144	0
hsa-miR-26b-5p	INCENP	-0.367134	0
hsa-miR-29c-5p	FBXO10	-0.367115	0
hsa-miR-29c-3p	DDX19A	-0.367056	0
hsa-miR-30a-5p	MCM2	-0.36697	0
hsa-miR-10a-5p	EZH2	-0.366942	0
hsa-miR-30c-2-3p	NRBF2	-0.366931	0
hsa-miR-29c-3p	KCTD20	-0.366915	0
hsa-miR-195-5p	KCMF1	-0.366891	0
hsa-miR-218-5p	E2F7	-0.366887	0
hsa-miR-34c-5p	CCNE1	-0.366879	0
hsa-miR-379-5p	E2F5	-0.36686	0
hsa-miR-29c-5p	SERBP1	-0.366856	0
hsa-miR-10b-3p	MDGA2	-0.366846	6.28584e-10
hsa-miR-342-5p	SNAI1	-0.366792	0
hsa-miR-29a-3p	MCM6	-0.36677	0
hsa-miR-432-5p	CCNA2	-0.366759	0
hsa-miR-29a-3p	NCOA6	-0.366669	0
hsa-miR-199b-5p	STIP1	-0.366668	0
hsa-miR-30a-5p	DNMT3A	-0.366606	0
hsa-miR-34c-5p	CHORDC1	-0.366588	0
hsa-let-7b-5p	XPO5	-0.36653	0
hsa-miR-10b-3p	FAM136A	-0.366507	0
hsa-miR-30a-5p	MAP4K4	-0.366476	0
hsa-miR-432-5p	E2F5	-0.366446	0
hsa-miR-199b-5p	LARP4B	-0.366435	0
hsa-miR-342-5p	UCK2	-0.366424	0
hsa-miR-342-5p	SLC6A14	-0.366343	0
hsa-miR-204-5p	CCNE2	-0.366304	0
hsa-miR-342-3p	UBE2E3	-0.366218	0
hsa-let-7b-3p	YBX1	-0.366163	0
hsa-miR-190b-5p	RND3	-0.366158	0
hsa-miR-34c-5p	TIMM8A	-0.366092	0
hsa-miR-664a-5p	INCENP	-0.366068	0
hsa-miR-342-3p	DNMT3B	-0.36606	0
hsa-miR-195-5p	R3HDM1	-0.365999	0
hsa-miR-375-3p	PDE7A	-0.365958	0
hsa-miR-29b-2-5p	GAS1	-0.365953	0
hsa-miR-29c-5p	GPM6B	-0.365869	0
hsa-miR-100-5p	KIF20A	-0.365868	0
hsa-let-7b-3p	DCAF15	-0.365857	0
hsa-let-7b-5p	TMEM65	-0.365854	0
hsa-miR-26a-5p	SLC7A5	-0.365816	0
hsa-miR-139-5p	PLK4	-0.365785	0
hsa-miR-190b-5p	PELI1	-0.365745	0
hsa-miR-29c-5p	RNF145	-0.365741	0
hsa-miR-29c-3p	STIP1	-0.36572	0
hsa-miR-29b-2-5p	MAP2K3	-0.365718	0
hsa-miR-664a-3p	MAP4K4	-0.365641	0
hsa-miR-139-5p	RCC2	-0.365554	0
hsa-miR-375-3p	LANCL3	-0.365483	0
hsa-miR-30c-2-3p	PSME4	-0.365431	0
hsa-miR-375-3p	RAP2B	-0.365389	0
hsa-miR-218-5p	LRPPRC	-0.365377	0
hsa-miR-29c-5p	CARM1	-0.365376	0
hsa-miR-29c-3p	DCUN1D1	-0.365332	0
hsa-miR-29b-2-5p	DCPS	-0.365322	0
hsa-miR-379-5p	KPNA2	-0.365309	0
hsa-miR-139-3p	BIRC5	-0.365303	0
hsa-miR-195-5p	LDHA	-0.365274	0
hsa-let-7b-5p	GINS3	-0.36523	0
hsa-miR-375-3p	CX3CL1	-0.365209	0
hsa-miR-29b-2-5p	DAZL	-0.365198	4.86899e-12
hsa-miR-30a-3p	STIP1	-0.365188	0
hsa-miR-29c-5p	MGAT3	-0.365155	0
hsa-miR-26a-5p	ME2	-0.365147	0
hsa-miR-29c-5p	EPHB2	-0.364979	0
hsa-miR-30a-3p	KCMF1	-0.364962	0
hsa-miR-199b-5p	UBE2V2	-0.364947	0
hsa-miR-190b-5p	NFIB	-0.364919	0
hsa-miR-664a-5p	KIF23	-0.364898	0
hsa-miR-34c-5p	HDAC2	-0.36473	0
hsa-miR-29c-3p	HSPH1	-0.364687	0
hsa-miR-29b-2-5p	SEL1L3	-0.364639	0
hsa-miR-26a-5p	CCNF	-0.364609	0
hsa-miR-199b-5p	TMPO	-0.36451	0
hsa-miR-30a-5p	INTS8	-0.364417	0
hsa-miR-29b-2-5p	GLS	-0.364401	0
hsa-miR-30c-2-3p	SF3B3	-0.364386	0
hsa-miR-190b-5p	ANKRD11	-0.364344	0
hsa-miR-199a-5p	HNRNPA2B1	-0.364314	0
hsa-miR-139-3p	BTF3L4	-0.364237	0
hsa-let-7a-5p	ZNRF1	-0.364234	0
hsa-miR-139-3p	STIP1	-0.364233	0
hsa-miR-26a-5p	HSP90B1	-0.364203	0
hsa-miR-139-3p	EZH2	-0.364168	0
hsa-miR-375-3p	SLC6A14	-0.364146	0
hsa-let-7a-5p	LBR	-0.364127	0
hsa-miR-342-3p	FAM171A1	-0.364106	0
hsa-miR-10b-3p	E2F7	-0.363997	0
hsa-miR-101-5p	FAM98A	-0.363995	0
hsa-miR-190b-5p	SGK1	-0.363976	0
hsa-miR-29b-2-5p	FAM136A	-0.36396	0
hsa-miR-29b-2-5p	POU4F1	-0.363913	2.20554e-10
hsa-miR-199a-5p	FAM136A	-0.363893	0
hsa-miR-375-3p	NMT2	-0.363882	0
hsa-miR-29c-3p	ARL5B	-0.363878	0
hsa-miR-99a-5p	UNG	-0.363867	0
hsa-miR-204-5p	TRIM59	-0.363857	0
hsa-miR-218-5p	XPO5	-0.363842	0
hsa-miR-30a-5p	YWHAQ	-0.363726	0
hsa-miR-664a-5p	A2ML1	-0.363723	0
hsa-miR-101-3p	TMEFF1	-0.363714	0
hsa-miR-29c-3p	TMPO	-0.363663	0
hsa-miR-30c-2-3p	MTCH2	-0.363652	0
hsa-miR-139-3p	YWHAZ	-0.363525	0
hsa-miR-101-3p	EML4	-0.363499	0
hsa-let-7a-5p	E2F3	-0.363484	0
hsa-miR-190b-5p	FBXO10	-0.363451	0
hsa-miR-139-5p	LDHA	-0.363437	0
hsa-miR-190b-5p	LMO4	-0.363405	0
hsa-miR-342-3p	RAP2B	-0.363346	0
hsa-miR-379-5p	CHEK1	-0.36333	0
hsa-miR-29b-2-5p	CCNJL	-0.363299	0
hsa-miR-26a-5p	SMC2	-0.363259	0
hsa-miR-10b-5p	ZNF367	-0.363178	0
hsa-miR-100-5p	HSPE1	-0.363171	0
hsa-miR-101-3p	SLC7A5	-0.363166	0
hsa-miR-30a-5p	ADAM19	-0.363143	0
hsa-miR-190b-5p	PTCHD1	-0.363134	0
hsa-miR-29b-2-5p	PTGS2	-0.363104	0
hsa-miR-29b-2-5p	CLCN5	-0.363094	0
hsa-miR-30c-2-3p	TAF5	-0.363092	0
hsa-miR-190b-5p	BCAT1	-0.363087	0
hsa-miR-342-5p	GPR3	-0.363083	0
hsa-miR-195-5p	RPN1	-0.363079	0
hsa-miR-139-5p	POLQ	-0.363077	0
hsa-miR-664a-5p	GABBR2	-0.363069	3.55271e-15
hsa-miR-29b-2-5p	PITPNB	-0.363	0
hsa-miR-29c-5p	MAP7D3	-0.362958	0
hsa-miR-342-3p	JRKL	-0.362903	0
hsa-miR-29c-3p	TTF2	-0.362902	0
hsa-miR-218-5p	MCM6	-0.362856	0
hsa-miR-342-5p	ZNRF1	-0.362831	0
hsa-miR-26a-5p	AMD1	-0.362776	0
hsa-miR-29b-2-5p	MGAT3	-0.362751	0
hsa-miR-34c-5p	ATAD2	-0.362735	0
hsa-miR-29b-2-5p	IL2RG	-0.362718	0
hsa-miR-10b-5p	MTBP	-0.362701	0
hsa-miR-30c-2-3p	DYRK2	-0.362699	0
hsa-miR-432-5p	CDC25A	-0.362675	0
hsa-miR-190b-5p	GABRA5	-0.362646	6.07874e-11
hsa-miR-432-5p	KPNA2	-0.362638	0
hsa-miR-10b-5p	FAM136A	-0.362624	0
hsa-miR-342-5p	CHAC1	-0.362613	0
hsa-miR-204-5p	HMGB3	-0.362541	0
hsa-miR-29c-5p	ACTN4	-0.362535	0
hsa-miR-664a-5p	PHF19	-0.362431	0
hsa-miR-342-5p	PTCHD1	-0.362333	0
hsa-miR-664a-3p	RAD51	-0.362259	0
hsa-miR-497-5p	KPNA2	-0.362211	0
hsa-miR-29b-2-5p	SMARCB1	-0.362185	0
hsa-miR-29b-2-5p	HMGA1	-0.362115	0
hsa-miR-190b-5p	KLRD1	-0.362097	0
hsa-miR-190b-5p	SOCS1	-0.362051	0
hsa-miR-139-5p	CCNE1	-0.36196	0
hsa-miR-30c-2-3p	PHTF2	-0.361938	0
hsa-miR-375-3p	PIM1	-0.361938	0
hsa-miR-30c-2-3p	IGF2BP1	-0.361917	2.22045e-16
hsa-let-7b-3p	DNMT3B	-0.361892	0
hsa-miR-30a-3p	HNRNPAB	-0.361884	0
hsa-miR-29b-2-5p	ADARB1	-0.361835	0
hsa-miR-29c-5p	MAPK7	-0.361824	0
hsa-miR-432-5p	CCNE2	-0.361788	0
hsa-miR-664a-5p	LRP8	-0.361771	0
hsa-miR-10a-5p	KCMF1	-0.361763	0
hsa-miR-29b-2-5p	IFFO2	-0.36176	0
hsa-miR-26a-5p	TIMM8A	-0.361759	0
hsa-miR-29b-2-5p	CAV2	-0.361757	0
hsa-miR-195-5p	NAA50	-0.361751	0
hsa-miR-29c-3p	CASP2	-0.361709	0
hsa-miR-139-3p	RAD51	-0.361671	0
hsa-miR-29c-3p	MCM2	-0.361548	0
hsa-miR-26a-5p	EIF2S1	-0.36154	0
hsa-miR-195-3p	CHORDC1	-0.361536	0
hsa-miR-30a-5p	PHTF2	-0.361479	0
hsa-let-7a-5p	KPNA4	-0.361472	0
hsa-miR-199b-5p	R3HDM1	-0.361458	0
hsa-miR-199b-5p	USP1	-0.361453	0
hsa-miR-139-5p	SLBP	-0.361443	0
hsa-miR-342-5p	RNF145	-0.361366	0
hsa-miR-30c-2-3p	CLCN5	-0.361338	0
hsa-miR-26a-5p	INCENP	-0.361338	0
hsa-miR-34c-5p	TTF2	-0.361333	0
hsa-miR-26a-5p	HSPH1	-0.361296	0
hsa-miR-29c-5p	ETS2	-0.36123	0
hsa-miR-30c-2-3p	IGF2BP3	-0.361207	0
hsa-miR-199b-5p	INTS8	-0.36115	0
hsa-let-7a-5p	IGF2BP3	-0.361096	0
hsa-miR-139-5p	HSPE1	-0.361082	0
hsa-miR-190b-5p	LRP12	-0.361081	0
hsa-miR-190b-5p	TOX	-0.361071	0
hsa-miR-218-5p	UNG	-0.361015	0
hsa-miR-29b-2-5p	DNMT3A	-0.361005	0
hsa-miR-190b-5p	MAPK4	-0.360944	0
hsa-miR-30c-2-3p	TIMM8A	-0.360942	0
hsa-miR-26a-5p	FAM136A	-0.360927	0
hsa-miR-190b-5p	SERPINB5	-0.360904	0
hsa-miR-29c-5p	COL4A4	-0.360898	0
hsa-miR-10b-5p	LMNB1	-0.360835	0
hsa-miR-337-3p	CCNA2	-0.360619	0
hsa-miR-29c-5p	SMTNL2	-0.360586	0
hsa-miR-375-3p	MAP7D3	-0.360574	0
hsa-miR-29c-3p	CTTNBP2NL	-0.360573	0
hsa-miR-30c-2-3p	LCLAT1	-0.36056	0
hsa-miR-190b-5p	TRIM2	-0.360546	0
hsa-miR-29c-5p	EPHB1	-0.360465	0
hsa-miR-26a-5p	DARS2	-0.360465	0
hsa-miR-199b-5p	POU4F1	-0.360413	3.36862e-10
hsa-let-7b-3p	IMPDH1	-0.360369	0
hsa-let-7b-5p	CTLA4	-0.360352	0
hsa-miR-190b-5p	RYR3	-0.360307	0
hsa-miR-195-3p	KPNA4	-0.360242	0
hsa-miR-29a-3p	RANBP9	-0.360209	0
hsa-miR-29c-5p	NCOA7	-0.360183	0
hsa-miR-30a-5p	RPN1	-0.360159	0
hsa-let-7a-5p	GINS3	-0.360158	0
hsa-miR-29b-2-5p	RASGEF1B	-0.360113	0
hsa-miR-190b-5p	ADAM19	-0.360087	0
hsa-miR-29b-2-5p	UGT8	-0.360061	0
hsa-miR-190b-5p	ACTB	-0.36006	0
hsa-miR-199b-5p	TIMELESS	-0.360006	0
hsa-miR-342-3p	C15orf39	-0.360004	0
hsa-miR-199b-5p	WDR76	-0.359953	0
hsa-miR-664a-5p	KPNA2	-0.359913	0
hsa-miR-29b-2-5p	NUDT11	-0.359911	0
hsa-miR-26a-5p	KIF21A	-0.359904	0
hsa-miR-190b-5p	SH3TC2	-0.35985	0
hsa-miR-195-5p	CDK8	-0.359825	0
hsa-miR-342-3p	NOTCH1	-0.35976	0
hsa-miR-29c-3p	RCC2	-0.359702	0
hsa-miR-29a-3p	MPHOSPH9	-0.359642	0
hsa-miR-30c-2-3p	ME2	-0.359641	0
hsa-miR-29a-3p	HLTF	-0.359562	0
hsa-miR-342-3p	CORO1C	-0.35956	0
hsa-miR-30c-2-3p	EML4	-0.359391	0
hsa-miR-190b-5p	CYP26B1	-0.359387	0
hsa-miR-342-5p	ADAMTS3	-0.359356	0
hsa-miR-379-5p	HSPD1	-0.359321	0
hsa-miR-26a-5p	TOP1	-0.359306	0
hsa-miR-29c-5p	TNFAIP3	-0.359305	0
hsa-miR-10b-5p	CCDC77	-0.359301	0
hsa-miR-190b-5p	PREP	-0.359289	0
hsa-miR-190b-5p	CTTNBP2NL	-0.359241	0
hsa-miR-195-3p	RPN1	-0.359238	0
hsa-miR-30a-3p	CIB2	-0.359208	0
hsa-miR-190b-5p	PDXK	-0.359197	0
hsa-miR-190b-5p	MFHAS1	-0.359168	0
hsa-miR-30a-5p	BEND3	-0.359166	0
hsa-miR-190b-5p	CAMK1D	-0.359151	0
hsa-miR-195-5p	TIMELESS	-0.359039	0
hsa-miR-26a-5p	ATP2C1	-0.358974	0
hsa-miR-10a-5p	CKS2	-0.358969	0
hsa-miR-29b-2-5p	RPS6KA4	-0.358932	0
hsa-miR-190b-5p	IFFO2	-0.35893	0
hsa-miR-34c-5p	GINS1	-0.358909	0
hsa-miR-29c-3p	UCK2	-0.358893	0
hsa-miR-29a-3p	MED14	-0.358893	0
hsa-miR-199a-5p	RAN	-0.358861	0
hsa-miR-199b-5p	SLC7A5	-0.358859	0
hsa-miR-26a-5p	BAZ1B	-0.35885	0
hsa-miR-190b-5p	TBPL1	-0.358801	0
hsa-miR-342-3p	PLS3	-0.358773	0
hsa-miR-342-3p	FSCN1	-0.35877	0
hsa-miR-199b-5p	GMPS	-0.358758	0
hsa-miR-30a-3p	TPD52L2	-0.358743	0
hsa-miR-375-3p	SLC16A1	-0.358713	0
hsa-miR-218-5p	PBK	-0.358707	0
hsa-miR-29c-3p	UBE2D1	-0.358692	0
hsa-miR-10b-3p	HMGB3	-0.35869	0
hsa-miR-34c-5p	SLC7A5	-0.358651	0
hsa-miR-497-5p	EIF2S2	-0.3586	0
hsa-miR-29a-3p	KIF21A	-0.35853	0
hsa-miR-26a-5p	CASP3	-0.358529	0
hsa-miR-342-5p	SLC10A3	-0.35852	0
hsa-miR-29c-3p	MED14	-0.358473	0
hsa-miR-26a-5p	DLAT	-0.358457	0
hsa-miR-190b-5p	ADAM17	-0.358451	0
hsa-miR-29c-5p	DNMT3B	-0.358377	0
hsa-miR-30a-5p	CCNF	-0.358366	0
hsa-miR-10a-5p	PLK4	-0.358343	0
hsa-miR-139-3p	CHORDC1	-0.358318	0
hsa-miR-29b-2-5p	DMRT3	-0.35827	0
hsa-miR-375-3p	C2orf88	-0.358105	0
hsa-miR-190b-5p	NAMPT	-0.358075	0
hsa-miR-100-5p	BTF3L4	-0.358074	0
hsa-miR-29b-2-5p	SOX11	-0.358072	0
hsa-let-7a-5p	HSPD1	-0.358072	0
hsa-miR-195-5p	STAU1	-0.358051	0
hsa-miR-26a-5p	RAB10	-0.358015	0
hsa-miR-30a-3p	CCNF	-0.358013	0
hsa-miR-29c-5p	BIN1	-0.357993	0
hsa-let-7b-5p	SH3GL3	-0.357962	1.09401e-12
hsa-miR-26a-5p	ZNF367	-0.357957	0
hsa-miR-29a-3p	BIRC5	-0.357949	0
hsa-miR-195-3p	PSME4	-0.357948	0
hsa-let-7a-5p	CDK2AP1	-0.357863	0
hsa-miR-29a-3p	KPNA1	-0.357842	0
hsa-miR-29b-2-5p	PCBP4	-0.357819	0
hsa-miR-101-3p	CKAP4	-0.357794	0
hsa-miR-30a-3p	CCNE2	-0.357789	0
hsa-let-7b-3p	RALY	-0.357775	0
hsa-miR-29b-2-5p	FAM135A	-0.357729	0
hsa-miR-375-3p	NIPAL4	-0.357689	0
hsa-miR-101-3p	MTMR2	-0.357656	0
hsa-miR-190b-5p	TTYH3	-0.357652	0
hsa-miR-30a-5p	TMEFF1	-0.357647	0
hsa-miR-190b-5p	RIMS3	-0.357637	0
hsa-miR-26a-5p	MCM2	-0.357637	0
hsa-miR-195-3p	LRP8	-0.357582	0
hsa-miR-342-5p	PLTP	-0.357559	0
hsa-let-7b-3p	TPD52L2	-0.357556	0
hsa-miR-664a-3p	GINS3	-0.357514	0
hsa-miR-29c-3p	LIN9	-0.357514	0
hsa-miR-30c-2-3p	TIMELESS	-0.357395	0
hsa-miR-664a-3p	ADAM19	-0.357328	0
hsa-miR-29c-3p	LRRC40	-0.357323	0
hsa-miR-342-3p	YBX1	-0.357313	0
hsa-miR-342-5p	KHDRBS3	-0.357289	0
hsa-miR-29a-3p	ZNF367	-0.357285	0
hsa-miR-29b-2-5p	SGK1	-0.357264	0
hsa-miR-101-3p	MOSPD1	-0.357248	0
hsa-miR-30a-5p	ME1	-0.357238	0
hsa-miR-29b-2-5p	TNFRSF21	-0.357212	0
hsa-miR-29c-3p	QSER1	-0.357174	0
hsa-miR-26a-5p	TTF2	-0.357099	0
hsa-miR-30c-2-3p	MTHFD1L	-0.357085	0
hsa-miR-101-3p	ZC3H15	-0.357067	0
hsa-miR-30a-3p	ONECUT2	-0.357047	0
hsa-miR-190b-5p	ZNF280B	-0.357023	0
hsa-miR-30a-5p	CCNYL1	-0.357017	0
hsa-miR-190b-5p	GPR3	-0.356996	0
hsa-miR-29c-5p	DCPS	-0.356974	0
hsa-miR-29b-2-5p	BMP7	-0.356959	0
hsa-miR-342-3p	SH3GL3	-0.35691	1.28697e-12
hsa-miR-29c-5p	LANCL3	-0.356872	0
hsa-miR-379-5p	RAD21	-0.356866	0
hsa-miR-10b-5p	CCT5	-0.356838	0
hsa-miR-30a-3p	KCTD5	-0.356796	0
hsa-miR-10b-3p	CCNE2	-0.356763	0
hsa-miR-190b-5p	PPP3R1	-0.356747	0
hsa-let-7a-5p	TTLL4	-0.356694	0
hsa-miR-30c-2-3p	CHRNA5	-0.356676	0
hsa-miR-139-3p	CCNE2	-0.356647	0
hsa-miR-29c-3p	C1orf198	-0.356622	0
hsa-miR-195-5p	ME2	-0.356619	0
hsa-miR-10b-3p	PSME4	-0.356619	0
hsa-miR-29b-2-5p	ETS1	-0.356584	0
hsa-miR-29c-3p	SMC2	-0.356564	0
hsa-let-7b-5p	SNRPB2	-0.356533	0
hsa-miR-29c-5p	BTG3	-0.35652	0
hsa-miR-29c-3p	YBX1	-0.356518	0
[truncated: 217 more rows]

## Sheet: Suppl.Table S3
Supplementary Table S3 : TopoGo GO enrichment analysis - Biological Processes
Term	Description	LogP	Log(q-value)	InTerm_InList	Symbols
GO:0000278	mitotic cell cycle	-16.3977	-12.2095	46/622	BIRC5,BCAT1,CASP2,CCNA2,CCNE1,CCNF,CDC25A,CDC34,CDK6,CHEK1,CKS2,CLTC,DNMT3A,E2F3,EZH2,GFI1,ID4,INCENP,ITGB1,MCM2,MCM6,MYBL1,NASP,PRKCA,RAD51,RAN,CUL2,KLF11,CCNE2,KIF23,GINS1,KIF20A,SMC2,PLK4,CIT,MAPRE1,EML4,CCNJ,PBK,TTYH1,GINS3,CCNJL,NAA50,TUBB6,E2F7,CCNY
GO:0044770	cell cycle phase transition	-14.1861	-10.299	24/182	BCAT1,CCNA2,CCNE1,CCNF,CDC25A,CDC34,CDK6,CHEK1,CKS2,E2F3,EZH2,GFI1,ID4,ITGB1,NASP,CUL2,KLF11,TIMELESS,CCNE2,CIT,CCNJ,CCNJL,E2F7,CCNY
GO:1903047	mitotic cell cycle process	-13.9149	-10.2039	39/529	BIRC5,BCAT1,CASP2,CCNA2,CCNE1,CCNF,CDC25A,CDC34,CDK6,CHEK1,CKS2,E2F3,EZH2,GFI1,ID4,INCENP,ITGB1,MCM2,MCM6,NASP,PRKCA,RAD51,RAN,CUL2,KLF11,CCNE2,KIF23,GINS1,KIF20A,SMC2,CIT,MAPRE1,EML4,CCNJ,GINS3,CCNJL,NAA50,E2F7,CCNY
GO:0044772	mitotic cell cycle phase transition	-13.753	-10.1669	23/172	BCAT1,CCNA2,CCNE1,CCNF,CDC25A,CDC34,CDK6,CHEK1,CKS2,E2F3,EZH2,GFI1,ID4,ITGB1,NASP,CUL2,KLF11,CCNE2,CIT,CCNJ,CCNJL,E2F7,CCNY
GO:0035239	tube morphogenesis	-13.1958	-9.70663	43/670	ADM,BMP7,KLF5,CASP3,MAPK14,EPHB1,EPHB2,EXT1,FOXC1,GATA6,HIF1A,HOXA1,ITGB1,MET,NFIB,NOTCH1,OPA1,PFN1,PPP3R1,PRKCA,PRKX,PTGS2,RALA,CX3CL1,SOX4,SOX11,SRF,YWHAZ,LMO4,TIMELESS,QKI,HS2ST1,HPSE,PDCD10,MTHFD1L,RGMA,ADAMTS9,NAA15,NUS1,PRICKLE1,E2F7,AMOTL1,RDH10
GO:0051301	cell division	-13.0369	-9.62693	37/509	BIRC5,CCNA2,CCNE1,CCNF,CDC25A,CDK6,CKS2,CLTC,EXT1,GNAI3,INCENP,NOTCH1,PPP1CB,RAD21,RALA,RAN,TOP1,USP9X,FZD7,TIMELESS,CCNE2,KIF23,ACTR3,ACTR2,KIF20A,SMC2,RAB10,MAPRE2,CIT,MAPRE1,WWTR1,EML4,RCC2,CABLES2,DOCK7,SENP5,CCNY
GO:0006259	DNA metabolic process	-12.1681	-8.82505	45/780	CCNE1,CDC34,CHEK1,DNMT3A,DNMT3B,EZH2,HMGB3,HMGA1,HSPD1,KPNA2,MCM2,MCM6,NASP,NFIB,RAD21,RAD51,RAN,RBMS1,RECQL,HLTF,SMARCB1,SSRP1,TCF7L2,TDG,TOP1,UBE2V1,UBE2V2,UNG,USP1,CDK2AP1,TTF2,TIMELESS,CCNE2,GINS1,CARM1,POLQ,PSME4,CCDC88A,BEND3,GINS3,BCL11B,SMC6,TET1,TET3,LIN9
GO:0044843	cell cycle G1/S phase transition	-11.9362	-8.65111	16/87	BCAT1,CCNA2,CCNE1,CDC25A,CDC34,CDK6,E2F3,EZH2,GFI1,ID4,ITGB1,NASP,CUL2,KLF11,CCNE2,E2F7
GO:0048729	tissue morphogenesis	-11.0313	-7.82895	36/565	ACTB,ADARB1,ADM,BMP7,CASP3,COL11A1,EXT1,FAT1,FOXC1,HIF1A,ID4,ITGB1,MET,NOTCH1,OPA1,PFN1,SERPINB5,POU4F1,PPP3R1,PRKX,RALA,SNAI1,SOX4,SOX11,SRF,ADAM17,LMO4,TIMELESS,CYP7B1,HS2ST1,RAB10,PDCD10,MTHFD1L,RGMA,PRICKLE1,RDH10
GO:0002009	morphogenesis of an epithelium	-11.0171	-7.82895	32/453	ACTB,ADM,BMP7,CASP3,EXT1,FAT1,HIF1A,ID4,ITGB1,MET,NOTCH1,OPA1,PFN1,SERPINB5,PPP3R1,PRKX,RALA,SNAI1,SOX4,SOX11,SRF,ADAM17,LMO4,TIMELESS,CYP7B1,HS2ST1,RAB10,PDCD10,MTHFD1L,RGMA,PRICKLE1,RDH10
GO:0000082	G1/S transition of mitotic cell cycle	-10.9571	-7.81035	15/85	BCAT1,CCNE1,CDC25A,CDC34,CDK6,E2F3,EZH2,GFI1,ID4,ITGB1,NASP,CUL2,KLF11,CCNE2,E2F7
GO:0006260	DNA replication	-10.434	-7.32505	21/203	CCNE1,CDC34,CHEK1,HMGA1,MCM2,MCM6,NASP,NFIB,RAD51,RBMS1,RECQL,SSRP1,TOP1,CDK2AP1,TIMELESS,CCNE2,GINS1,CARM1,POLQ,CCDC88A,GINS3
GO:0035148	tube formation	-10.1477	-7.07346	18/149	ADM,BMP7,CASP3,HIF1A,HOXA1,NFIB,NOTCH1,OPA1,PFN1,RALA,SOX4,SOX11,YWHAZ,LMO4,HS2ST1,MTHFD1L,RGMA,PRICKLE1
GO:0031175	neuron projection development	-9.71576	-6.67372	37/661	ACTB,ADARB1,ADM,BMP7,CASP3,EPHB1,EPHB2,EPHB6,EXT1,GPM6B,GSK3B,HDAC2,ITGB1,L1CAM,NFIB,NOTCH1,POU4F1,PRKCQ,RASGRF1,SGK1,SRF,UGT8,LRP8,USP9X,TMEFF1,B4GALT5,MAP4K4,SLC9A6,IGF2BP1,RAB10,TNFRSF21,LRP12,DPYSL5,RGMA,ISL2,BCL11B,DOCK7
GO:0009792	embryo development ending in birth or egg hatching	-9.6428	-6.63072	37/665	ADM,BMP7,CASP3,CHEK1,COL11A1,EXT1,ACSL4,FOXC1,GATA6,HIF1A,HOXA1,ITGB1,NASP,NOTCH1,YBX1,OPA1,PFN1,RALA,SMARCB1,SNAI1,SOX4,SOX11,SRF,TFEB,FOSL1,LMO4,EIF2S2,ADAMTS3,GINS1,PLK4,MTHFD1L,RGMA,TET1,KBTBD8,PRICKLE1,E2F7,RDH10
GO:0043009	chordate embryonic development	-9.46936	-6.48531	36/643	ADM,BMP7,CASP3,CHEK1,COL11A1,EXT1,FOXC1,GATA6,HIF1A,HOXA1,ITGB1,NASP,NOTCH1,YBX1,OPA1,PFN1,RALA,SMARCB1,SNAI1,SOX4,SOX11,SRF,TFEB,FOSL1,LMO4,EIF2S2,ADAMTS3,GINS1,PLK4,MTHFD1L,RGMA,TET1,KBTBD8,PRICKLE1,E2F7,RDH10
GO:0120035	regulation of plasma membrane bounded cell projection organization	-8.91769	-5.95997	35/642	BMP7,KLF5,EPHB2,EZH2,GFI1,GSK3B,HDAC2,IFRD1,L1CAM,MYO10,PFN1,RALA,RAP2A,CX3CL1,FSCN1,SRF,LRP8,HOMER1,TOX,ACTR3,ACTR2,MPHOSPH9,CARM1,DZIP1,RHOQ,CORO1C,FAM98A,TIAM2,DISC1,BCL11A,CCDC88A,RCC2,DPYSL5,RGMA,CAMK1D
GO:0031344	regulation of cell projection organization	-8.62337	-5.69048	35/659	BMP7,KLF5,EPHB2,EZH2,GFI1,GSK3B,HDAC2,IFRD1,L1CAM,MYO10,PFN1,RALA,RAP2A,CX3CL1,FSCN1,SRF,LRP8,HOMER1,TOX,ACTR3,ACTR2,MPHOSPH9,CARM1,DZIP1,RHOQ,CORO1C,FAM98A,TIAM2,DISC1,BCL11A,CCDC88A,RCC2,DPYSL5,RGMA,CAMK1D
GO:0001568	blood vessel development	-8.53058	-5.62117	30/507	ADM,KLF5,MAPK14,EPHB1,EPHB2,FOXC1,GATA6,HIF1A,HOXA1,ITGB1,NOTCH1,PPP3R1,PRKCA,PRKX,PTGS2,CX3CL1,SOX4,SRF,TCF7L2,YWHAZ,FOSL1,QKI,HPSE,PDCD10,ADAMTS9,NAA15,NUS1,PRICKLE1,E2F7,AMOTL1
GO:0006468	protein phosphorylation	-8.47039	-5.58325	36/701	BIRC5,CCNE1,CDK6,CDK8,CHEK1,MAPK14,EIF2S1,EPHB1,EPHB2,EPHB6,GSK3B,INCENP,MET,PDK1,PIM1,PRKCA,PRKCQ,MAPK4,MAPK7,MAP2K3,PRKX,RPS6KA3,SGK1,TAF5,TOP1,YES1,YWHAZ,DYRK2,RPS6KA4,BAZ1B,MAP4K4,PLK4,CIT,PRKD3,PBK,CAMK1D
GO:0000904	cell morphogenesis involved in differentiation	-8.40898	-5.56324	31/544	ACTB,ACTN1,ADARB1,BMP7,CASP3,EPHB1,EPHB2,EPHB6,EXT1,FAT1,ITGB1,L1CAM,MET,NFIB,NOTCH1,POU4F1,PRKCQ,RAB1A,SRF,LRP8,USP9X,FZD7,TMEFF1,B4GALT5,SLC9A6,IGF2BP1,RAB10,DPYSL5,ISL2,BCL11B,DOCK7
GO:0030036	actin cytoskeleton organization	-8.40898	-5.56324	31/544	ACTB,ACTN4,ACTN1,RND3,DMD,FAT1,ITGB1,PFN1,PLS3,RALA,RAN,RAP2A,FSCN1,SRF,TMOD1,HSP90B1,INA,ARPC5,ACTR3,ACTR2,CIT,MRAS,RHOQ,CORO1C,ATP2C1,SH3KBP1,FMNL2,PPARGC1B,AMOTL1,FAM171A1,SMTNL2
GO:0048598	embryonic morphogenesis	-8.288	-5.46156	32/582	ADM,BMP7,CASP3,COL11A1,EPHB2,ETS2,EXT1,FOXC1,GATA6,HDAC2,HIF1A,HOXA1,ITGB1,NOTCH1,YBX1,OPA1,PFN1,RALA,SNAI1,SOX4,SOX11,SRF,ZIC1,LMO4,KCNQ4,HS2ST1,MTHFD1L,CYP26B1,RGMA,LRIG3,PRICKLE1,RDH10
GO:0001944	vasculature development	-8.12703	-5.32071	30/528	ADM,KLF5,MAPK14,EPHB1,EPHB2,FOXC1,GATA6,HIF1A,HOXA1,ITGB1,NOTCH1,PPP3R1,PRKCA,PRKX,PTGS2,CX3CL1,SOX4,SRF,TCF7L2,YWHAZ,FOSL1,QKI,HPSE,PDCD10,ADAMTS9,NAA15,NUS1,PRICKLE1,E2F7,AMOTL1
GO:0032990	cell part morphogenesis	-8.11093	-5.32071	29/498	ACTB,ADARB1,BMP7,EPHB1,EPHB2,EPHB6,EXT1,ITGB1,L1CAM,NFIB,NOTCH1,POU4F1,PRKCQ,SGK1,SRF,UGT8,LRP8,USP9X,TMEFF1,B4GALT5,MAP4K4,DNM1L,SLC9A6,IGF2BP1,RAB10,DPYSL5,ISL2,BCL11B,DOCK7
GO:0048812	neuron projection morphogenesis	-8.0839	-5.32015	28/469	ACTB,ADARB1,BMP7,EPHB1,EPHB2,EPHB6,EXT1,ITGB1,L1CAM,NFIB,NOTCH1,POU4F1,PRKCQ,SGK1,SRF,UGT8,LRP8,USP9X,TMEFF1,B4GALT5,MAP4K4,SLC9A6,IGF2BP1,RAB10,DPYSL5,ISL2,BCL11B,DOCK7
GO:0032989	cellular component morphogenesis	-8.07696	-5.32015	32/594	ACTB,ADARB1,BMP7,EPHB1,EPHB2,EPHB6,EXT1,ITGB1,L1CAM,NFIB,NOTCH1,POU4F1,PRKCQ,SGK1,SRF,TMOD1,UGT8,LRP8,USP9X,TMEFF1,MTMR2,B4GALT5,MAP4K4,TBPL1,DNM1L,SLC9A6,IGF2BP1,RAB10,DPYSL5,ISL2,BCL11B,DOCK7
GO:0000902	cell morphogenesis	-8.05048	-5.31606	35/694	ACTB,ACTN1,ADARB1,BMP7,CASP3,MAPK14,EPHB1,EPHB2,EPHB6,EXT1,FAT1,ITGB1,L1CAM,MET,NFIB,NOTCH1,POU4F1,PRKCQ,RAB1A,SGK1,SRF,UGT8,LRP8,USP9X,FZD7,TMEFF1,B4GALT5,MAP4K4,SLC9A6,IGF2BP1,RAB10,DPYSL5,ISL2,BCL11B,DOCK7
GO:0070934	CRD-mediated mRNA stabilization	-8.04183	-5.31606	6/11	YBX1,SYNCRIP,IGF2BP1,IGF2BP3,IGF2BP2,PABPC1
GO:0008283	cell population proliferation	-7.98768	-5.29414	35/698	ADM,BMP7,CAV2,CDC25A,CHEK1,CKS2,EPHB1,ETV6,EXT1,FOXC1,GATA6,HIF1A,HSPD1,ID4,ITGB1,KPNA1,NFIB,NOTCH1,PDK1,PRKCQ,PRKX,RASGRF1,CX3CL1,ST8SIA1,SOX4,SOX11,EIF2S2,CYP7B1,GINS1,IGF2BP1,RAB10,DAZAP1,DISC1,PELI1,DOCK7
GO:0120039	plasma membrane bounded cell projection morphogenesis	-7.98459	-5.29414	28/474	ACTB,ADARB1,BMP7,EPHB1,EPHB2,EPHB6,EXT1,ITGB1,L1CAM,NFIB,NOTCH1,POU4F1,PRKCQ,SGK1,SRF,UGT8,LRP8,USP9X,TMEFF1,B4GALT5,MAP4K4,SLC9A6,IGF2BP1,RAB10,DPYSL5,ISL2,BCL11B,DOCK7
GO:0000079	regulation of cyclin-dependent protein serine/threonine kinase activity	-7.97716	-5.29414	14/117	ACTB,CASP3,CCNA2,CCNE1,CCNF,CDC25A,CKS2,ADAM17,TNFAIP3,CCNE2,CCNJ,CCNJL,CCNYL1,CCNY
GO:0051052	regulation of DNA metabolic process	-7.90634	-5.23669	30/540	ACTB,CCNA2,CHEK1,HNRNPA2B1,HNRNPAB,KPNA1,KPNA2,MCM2,MCM6,PRKCQ,RAD51,RLF,SMARCB1,TAF5,TFRC,UBE2V1,UBE2V2,USP1,USP9X,TIMELESS,TOX,GINS1,ACTR2,POLQ,CCT5,SF3B3,CCDC88A,GINS3,SMC6,E2F7
GO:0048858	cell projection morphogenesis	-7.88672	-5.23003	28/479	ACTB,ADARB1,BMP7,EPHB1,EPHB2,EPHB6,EXT1,ITGB1,L1CAM,NFIB,NOTCH1,POU4F1,PRKCQ,SGK1,SRF,UGT8,LRP8,USP9X,TMEFF1,B4GALT5,MAP4K4,SLC9A6,IGF2BP1,RAB10,DPYSL5,ISL2,BCL11B,DOCK7
GO:0048514	blood vessel morphogenesis	-7.84557	-5.20203	26/421	ADM,KLF5,MAPK14,EPHB1,EPHB2,FOXC1,HIF1A,HOXA1,ITGB1,NOTCH1,PPP3R1,PRKCA,PRKX,PTGS2,CX3CL1,SOX4,SRF,YWHAZ,QKI,HPSE,PDCD10,ADAMTS9,NAA15,NUS1,E2F7,AMOTL1
GO:1904029	regulation of cyclin-dependent protein kinase activity	-7.83389	-5.20203	14/120	ACTB,CASP3,CCNA2,CCNE1,CCNF,CDC25A,CKS2,ADAM17,TNFAIP3,CCNE2,CCNJ,CCNJL,CCNYL1,CCNY
GO:0060284	regulation of cell development	-7.77147	-5.1515	29/516	ACTN4,BIN1,BMP7,EPHB2,EZH2,GSK3B,HDAC2,HIF1A,ID4,IFRD1,ITGB1,L1CAM,NOTCH1,POU4F1,RHEB,CX3CL1,HLTF,SOX11,SRF,LRP8,SLC7A5,ACTR2,CORO1C,TIAM2,DISC1,BCL11A,RCC2,DPYSL5,DOCK7
GO:0051960	regulation of nervous system development	-7.74158	-5.13554	27/456	BIN1,BMP7,EPHB1,EPHB2,EZH2,HDAC2,HIF1A,ID4,IFRD1,ITGB1,L1CAM,NOTCH1,POU4F1,RHEB,CX3CL1,HLTF,SOX11,SRF,LRP8,SLC7A5,MTMR2,ACTR2,TIAM2,DISC1,TNFRSF21,DPYSL5,DOCK7
GO:0061564	axon development	-7.73265	-5.13554	25/397	ACTB,ADARB1,BMP7,CASP3,EPHB1,EPHB2,EPHB6,EXT1,ITGB1,L1CAM,NFIB,NOTCH1,POU4F1,PRKCQ,SRF,USP9X,TMEFF1,B4GALT5,SLC9A6,RAB10,TNFRSF21,DPYSL5,ISL2,BCL11B,DOCK7
GO:0060562	epithelial tube morphogenesis	-7.69468	-5.10857	22/314	ADM,BMP7,CASP3,EXT1,HIF1A,MET,NOTCH1,OPA1,PFN1,PPP3R1,PRKX,RALA,SOX4,SOX11,SRF,LMO4,TIMELESS,HS2ST1,MTHFD1L,RGMA,PRICKLE1,RDH10
GO:0001841	neural tube formation	-7.63163	-5.05625	13/105	ADM,BMP7,CASP3,HIF1A,OPA1,PFN1,RALA,SOX4,SOX11,LMO4,MTHFD1L,RGMA,PRICKLE1
GO:0001838	embryonic epithelial tube formation	-7.60448	-5.0405	14/125	ADM,BMP7,CASP3,HIF1A,OPA1,PFN1,RALA,SOX4,SOX11,LMO4,HS2ST1,MTHFD1L,RGMA,PRICKLE1
GO:0016331	morphogenesis of embryonic epithelium	-7.59087	-5.0405	15/146	ADM,BMP7,CASP3,HIF1A,OPA1,PFN1,RALA,SOX4,SOX11,LMO4,HS2ST1,MTHFD1L,RGMA,PRICKLE1,RDH10
GO:0051276	chromosome organization	-7.58522	-5.0405	27/464	BIRC5,CCNE1,EZH2,HMGB3,HMGA1,HNRNPA2B1,INCENP,MCM2,MCM6,NASP,RAD21,RAD51,RAN,RECQL,TCF7L2,TOP1,CCNE2,KIF23,GINS1,SMC2,POLQ,MAPRE1,EML4,HJURP,GINS3,SMC6,NAA50
GO:0080135	regulation of cellular response to stress	-7.56249	-5.02753	35/726	ACTB,BMP7,CHEK1,EPHB1,GCH1,GSK3B,HIF1A,MET,OPA1,MAPK7,PTGS2,RAD51,RAP2A,SMARCB1,SNAI1,SOD2,SOX4,TAF5,UBE2V1,UBE2V2,USP1,FZD7,TIMELESS,BAZ1B,MFHAS1,MAP4K4,ACTR2,POLQ,PDCD10,SF3B3,CHORDC1,PBK,RGMA,WDR76,NCOA7
GO:0007420	brain development	-7.54167	-5.02073	36/762	ACTB,BMP7,CASP2,CASP3,CDK6,EPHB1,EPHB2,EXT1,EZH2,FOXC1,G6PD,GABRA5,GNAI3,GSK3B,HIF1A,ID4,ITGB1,NFIB,NOTCH1,PEX13,POU4F1,SRF,ZIC1,LRP8,INA,TOX,ARPC5,IGF2BP1,YWHAQ,NCOA6,DISC1,DDIT4,BCL11B,B3GNT5,DOCK7,PTCHD1
GO:0050767	regulation of neurogenesis	-7.5368	-5.02073	24/377	BIN1,BMP7,EPHB2,EZH2,HDAC2,HIF1A,ID4,IFRD1,ITGB1,L1CAM,NOTCH1,POU4F1,RHEB,CX3CL1,HLTF,SOX11,SRF,LRP8,SLC7A5,ACTR2,TIAM2,DISC1,DPYSL5,DOCK7
GO:0021953	central nervous system neuron differentiation	-7.43922	-4.93229	16/172	ADARB1,EPHB1,EPHB2,EPHB6,ID4,NFIB,POU4F1,SOX4,LMO4,B4GALT5,TOX,DISC1,DMRT3,ISL2,BCL11B,MDGA2
GO:0070482	response to oxygen levels	-7.4279	-4.92992	22/325	ACTN4,ADM,BMP7,CASP3,CCNA2,DNMT3A,GATA6,HDAC2,HIF1A,NOTCH1,PDK1,PLOD2,PPARA,PTGS2,SOD2,SRF,ADAM17,TFRC,HSP90B1,SLC7A5,DDIT4,VASN
GO:1903312	negative regulation of mRNA metabolic process	-7.34806	-4.86197	12/92	MAPK14,DAZL,ELAVL1,HNRNPA2B1,HNRNPAB,YBX1,SYNCRIP,IGF2BP1,IGF2BP3,IGF2BP2,PABPC1,PCBP4
GO:0007409	axonogenesis	-7.34257	-4.86197	23/357	ACTB,ADARB1,BMP7,EPHB1,EPHB2,EPHB6,EXT1,ITGB1,L1CAM,NFIB,NOTCH1,POU4F1,PRKCQ,SRF,USP9X,TMEFF1,B4GALT5,SLC9A6,RAB10,DPYSL5,ISL2,BCL11B,DOCK7
GO:0030029	actin filament-based process	-7.33173	-4.86052	31/606	ACTB,ACTN4,ACTN1,RND3,DMD,FAT1,ITGB1,PFN1,PLS3,RALA,RAN,RAP2A,FSCN1,SRF,TMOD1,HSP90B1,INA,ARPC5,ACTR3,ACTR2,CIT,MRAS,RHOQ,CORO1C,ATP2C1,SH3KBP1,FMNL2,PPARGC1B,AMOTL1,FAM171A1,SMTNL2
GO:0006268	DNA unwinding involved in DNA replication	-7.32042	-4.86052	7/22	HMGA1,MCM2,MCM6,RAD51,RECQL,GINS1,GINS3
GO:0120032	regulation of plasma membrane bounded cell projection assembly	-7.31629	-4.86052	17/199	KLF5,EPHB2,GSK3B,MYO10,PFN1,RALA,FSCN1,SRF,ACTR3,ACTR2,MPHOSPH9,DZIP1,RHOQ,CORO1C,FAM98A,CCDC88A,RCC2
GO:0072175	epithelial tube formation	-7.25966	-4.81264	14/133	ADM,BMP7,CASP3,HIF1A,OPA1,PFN1,RALA,SOX4,SOX11,LMO4,HS2ST1,MTHFD1L,RGMA,PRICKLE1
GO:0060491	regulation of cell projection assembly	-7.25262	-4.81264	17/201	KLF5,EPHB2,GSK3B,MYO10,PFN1,RALA,FSCN1,SRF,ACTR3,ACTR2,MPHOSPH9,DZIP1,RHOQ,CORO1C,FAM98A,CCDC88A,RCC2
GO:0048667	cell morphogenesis involved in neuron differentiation	-7.09905	-4.66675	25/428	ACTB,ADARB1,BMP7,EPHB1,EPHB2,EPHB6,EXT1,ITGB1,L1CAM,NFIB,NOTCH1,POU4F1,PRKCQ,SRF,LRP8,USP9X,TMEFF1,B4GALT5,SLC9A6,IGF2BP1,RAB10,DPYSL5,ISL2,BCL11B,DOCK7
GO:0001666	response to hypoxia	-7.08742	-4.66268	20/284	ACTN4,ADM,BMP7,CASP3,CCNA2,DNMT3A,GATA6,HIF1A,NOTCH1,PDK1,PLOD2,PPARA,PTGS2,SOD2,SRF,ADAM17,TFRC,HSP90B1,DDIT4,VASN
GO:1902369	negative regulation of RNA catabolic process	-7.02629	-4.60897	11/80	MAPK14,DAZL,ELAVL1,HNRNPAB,YBX1,LRPPRC,SYNCRIP,IGF2BP1,IGF2BP3,IGF2BP2,PABPC1
GO:0006261	DNA-templated DNA replication	-7.01723	-4.60721	14/139	CCNE1,CDC34,HMGA1,MCM2,MCM6,RAD51,RECQL,CDK2AP1,TIMELESS,CCNE2,GINS1,CARM1,POLQ,GINS3
GO:0031346	positive regulation of cell projection organization	-6.82108	-4.41824	22/352	BMP7,EPHB2,EZH2,GSK3B,L1CAM,PFN1,RALA,CX3CL1,FSCN1,SRF,LRP8,TOX,ACTR3,ACTR2,DZIP1,RHOQ,CORO1C,FAM98A,TIAM2,DISC1,CCDC88A,CAMK1D
GO:0001525	angiogenesis	-6.77859	-4.38902	21/325	KLF5,MAPK14,EPHB1,EPHB2,FOXC1,HIF1A,ITGB1,NOTCH1,PPP3R1,PRKCA,PRKX,PTGS2,CX3CL1,SRF,YWHAZ,HPSE,PDCD10,NAA15,NUS1,E2F7,AMOTL1
GO:0036293	response to decreased oxygen levels	-6.77206	-4.38902	20/297	ACTN4,ADM,BMP7,CASP3,CCNA2,DNMT3A,GATA6,HIF1A,NOTCH1,PDK1,PLOD2,PPARA,PTGS2,SOD2,SRF,ADAM17,TFRC,HSP90B1,DDIT4,VASN
GO:0051640	organelle localization	-6.77101	-4.38902	27/509	ACTN4,BIN1,CAV2,HIF1A,INCENP,ITGB1,LMNB1,OPA1,PEX13,RAB1A,RAN,ABCE1,XPO1,YWHAZ,TFEB,VAPB,DNM1L,ACTR3,ACTR2,LRPPRC,RAB10,PDCD10,MAPRE1,FAM98A,EML4,ARMC1,DOCK7
GO:0043549	regulation of kinase activity	-6.72918	-4.35434	35/786	ACTB,ADARB1,BMP7,CASP3,CCNA2,CCNE1,CCNF,CDC25A,CKS2,EPHB1,EPHB2,EPHB6,EZH2,INCENP,MET,MAP2K3,RAP2B,ADAM17,TNFAIP3,YWHAG,LRP8,DGKZ,LMO4,SOCS1,CCNE2,PDCD10,CORO1C,WWTR1,CHORDC1,NRBF2,CCNJ,CCDC88A,CCNJL,CCNYL1,CCNY
GO:1902373	negative regulation of mRNA catabolic process	-6.72296	-4.35434	10/68	MAPK14,DAZL,ELAVL1,HNRNPAB,YBX1,SYNCRIP,IGF2BP1,IGF2BP3,IGF2BP2,PABPC1
GO:0001890	placenta development	-6.64042	-4.27833	14/149	ADM,BMP7,CCNF,MAPK14,GJB2,HIF1A,PTGS2,SNAI1,TFEB,FOSL1,ADAM19,PLK4,DAZAP1,E2F7
GO:0045165	cell fate commitment	-6.58252	-4.22686	18/250	CASP3,ETS2,EXT1,GAS1,GATA6,IFRD1,ITGB1,NOTCH1,POU4F1,TCF7L2,ONECUT2,TOX,RAB10,CYP26B1,DMRT3,ISL2,BCL11B,DOCK7
GO:0031329	regulation of cellular catabolic process	-6.57414	-4.22482	35/798	CASP3,MAPK14,DAZL,ELAVL1,GNAI3,GSK3B,HIF1A,HNRNPAB,MET,YBX1,PPARA,PRKCA,RHEB,XPO1,TFEB,SLC7A5,USP9X,MTMR2,DNM1L,LRPPRC,SYNCRIP,IGF2BP1,IGF2BP3,IGF2BP2,LARP4B,SERBP1,PABPC1,DISC1,DCPS,PBK,RGMA,PCBP4,RRAGD,PRICKLE1,CCNY
GO:0050769	positive regulation of neurogenesis	-6.38458	-4.04923	17/231	BIN1,EPHB2,HDAC2,HIF1A,ID4,ITGB1,L1CAM,NOTCH1,RHEB,CX3CL1,SOX11,SRF,LRP8,SLC7A5,ACTR2,TIAM2,DISC1
GO:0048255	mRNA stabilization	-6.38007	-4.04923	9/57	MAPK14,DAZL,ELAVL1,YBX1,SYNCRIP,IGF2BP1,IGF2BP3,IGF2BP2,PABPC1
GO:0021915	neural tube development	-6.2605	-3.95882	14/160	ADM,BMP7,CASP3,HIF1A,NOTCH1,OPA1,PFN1,RALA,SOX4,SOX11,LMO4,MTHFD1L,RGMA,PRICKLE1
GO:0030900	forebrain development	-6.21671	-3.92063	22/382	CASP3,CDK6,EPHB2,EXT1,EZH2,GSK3B,HIF1A,ID4,NFIB,NOTCH1,PEX13,POU4F1,SRF,ZIC1,LRP8,TOX,ARPC5,IGF2BP1,DISC1,BCL11B,DOCK7,PTCHD1
GO:0014020	primary neural tube formation	-6.1596	-3.87453	11/97	ADM,BMP7,CASP3,HIF1A,OPA1,PFN1,RALA,LMO4,MTHFD1L,RGMA,PRICKLE1
GO:0001701	in utero embryonic development	-6.12232	-3.84264	22/387	ADM,BMP7,CHEK1,FOXC1,GATA6,HIF1A,ITGB1,NASP,NOTCH1,YBX1,SMARCB1,SNAI1,SRF,TFEB,FOSL1,EIF2S2,ADAMTS3,GINS1,PLK4,TET1,E2F7,RDH10
GO:0061013	regulation of mRNA catabolic process	-6.08901	-3.81465	15/190	MAPK14,DAZL,ELAVL1,HNRNPAB,YBX1,PRKCA,SYNCRIP,IGF2BP1,IGF2BP3,IGF2BP2,LARP4B,SERBP1,PABPC1,DCPS,PCBP4
GO:0009895	negative regulation of catabolic process	-6.04791	-3.78402	20/330	MAPK14,DAZL,ELAVL1,HNRNPAB,MET,MGAT3,YBX1,PPARA,SLC7A5,USP9X,MTMR2,LRPPRC,SYNCRIP,IGF2BP1,IGF2BP3,IGF2BP2,SF3B3,PABPC1,DDIT4,PBK
GO:1902969	mitotic DNA replication	-6.03758	-3.77883	5/12	MCM2,MCM6,RAD51,GINS1,GINS3
GO:0051962	positive regulation of nervous system development	-5.88844	-3.65722	18/279	BIN1,EPHB1,EPHB2,HDAC2,HIF1A,ID4,ITGB1,L1CAM,NOTCH1,RHEB,CX3CL1,SOX11,SRF,LRP8,SLC7A5,ACTR2,TIAM2,DISC1
GO:0043488	regulation of mRNA stability	-5.88161	-3.65722	14/172	MAPK14,DAZL,ELAVL1,YBX1,PRKCA,SYNCRIP,IGF2BP1,IGF2BP3,IGF2BP2,LARP4B,SERBP1,PABPC1,DCPS,PCBP4
GO:1903311	regulation of mRNA metabolic process	-5.86905	-3.64936	19/309	MAPK14,DAZL,ELAVL1,HNRNPA2B1,HNRNPAB,YBX1,PRKCA,QKI,SYNCRIP,IGF2BP1,IGF2BP3,IGF2BP2,KHDRBS3,LARP4B,SERBP1,DAZAP1,PABPC1,DCPS,PCBP4
GO:0071103	DNA conformation change	-5.85444	-3.64186	11/104	HMGB3,HMGA1,HNRNPA2B1,MCM2,MCM6,RAD51,RECQL,TOP1,GINS1,POLQ,GINS3
GO:0043489	RNA stabilization	-5.82354	-3.61764	9/66	MAPK14,DAZL,ELAVL1,YBX1,SYNCRIP,IGF2BP1,IGF2BP3,IGF2BP2,PABPC1
GO:0048285	organelle fission	-5.71212	-3.52827	20/347	BIRC5,CCNE1,CKS2,INCENP,MYBL1,OPA1,RAD21,RAD51,RAN,CCNE2,KIF23,DNM1L,ACTR3,ACTR2,SMC2,MAPRE1,CORO1C,EML4,CYP26B1,NAA50
GO:0120034	positive regulation of plasma membrane bounded cell projection assembly	-5.57326	-3.41064	11/111	GSK3B,PFN1,RALA,FSCN1,SRF,ACTR3,ACTR2,DZIP1,RHOQ,FAM98A,CCDC88A
GO:0043487	regulation of RNA stability	-5.53476	-3.38002	14/184	MAPK14,DAZL,ELAVL1,YBX1,PRKCA,SYNCRIP,IGF2BP1,IGF2BP3,IGF2BP2,LARP4B,SERBP1,PABPC1,DCPS,PCBP4
GO:0045859	regulation of protein kinase activity	-5.40743	-3.26848	29/672	ACTB,ADARB1,BMP7,CASP3,CCNA2,CCNE1,CCNF,CDC25A,CKS2,EPHB2,EZH2,INCENP,MAP2K3,RAP2B,ADAM17,TNFAIP3,YWHAG,LRP8,SOCS1,CCNE2,PDCD10,CORO1C,WWTR1,CHORDC1,CCNJ,CCDC88A,CCNJL,CCNYL1,CCNY
GO:0097435	supramolecular fiber organization	-5.37144	-3.24651	26/567	ACTN1,RND3,COL11A1,EXT1,FAT1,FOXC1,ITGB1,PLS3,FSCN1,SRF,TMOD1,HSP90B1,USP9X,INA,ADAMTS3,RANBP9,ARPC5,ACTR3,ACTR2,MAPRE1,CORO1C,SH3KBP1,CCDC88A,MAP7D3,PPARGC1B,FAM171A1
GO:0031330	negative regulation of cellular catabolic process	-5.36941	-3.24651	16/245	MAPK14,DAZL,ELAVL1,HNRNPAB,MET,YBX1,SLC7A5,USP9X,MTMR2,LRPPRC,SYNCRIP,IGF2BP1,IGF2BP3,IGF2BP2,PABPC1,PBK
GO:0044089	positive regulation of cellular component biogenesis	-5.3644	-3.24651	24/498	BIN1,BMP7,CDC34,EPHB1,EPHB2,GSK3B,MET,PFN1,PRKCA,RALA,CX3CL1,FSCN1,SRF,TFRC,MAP4K4,ACTR3,ACTR2,PLK4,DZIP1,MAPRE1,RHOQ,FAM98A,ASAP1,CCDC88A
GO:0032392	DNA geometric change	-5.31522	-3.20984	10/96	HMGB3,HMGA1,HNRNPA2B1,MCM2,MCM6,RAD51,RECQL,GINS1,POLQ,GINS3
GO:0002052	positive regulation of neuroblast proliferation	-5.23528	-3.14977	6/28	HIF1A,ID4,ITGB1,NOTCH1,CX3CL1,DISC1
GO:0021537	telencephalon development	-5.14884	-3.07794	16/255	CASP3,CDK6,EPHB2,EXT1,EZH2,GSK3B,HIF1A,ID4,NFIB,PEX13,SRF,ZIC1,LRP8,IGF2BP1,DISC1,BCL11B
GO:0006270	DNA replication initiation	-5.14076	-3.07316	6/29	CCNE1,CDC34,MCM2,MCM6,CCNE2,GINS3
GO:0010975	regulation of neuron projection development	-5.1248	-3.06048	22/446	BMP7,EPHB2,EZH2,GFI1,GSK3B,HDAC2,IFRD1,L1CAM,RAP2A,CX3CL1,SRF,LRP8,TOX,ACTR2,CARM1,TIAM2,DISC1,BCL11A,CCDC88A,DPYSL5,RGMA,CAMK1D
GO:0018209	peptidyl-serine modification	-5.01682	-2.97167	14/204	MAPK14,GALNT1,GSK3B,PRKCA,PRKCQ,MAPK7,PRKX,RPS6KA3,SGK1,TOP1,DYRK2,RPS6KA4,PBK,CAMK1D
GO:0051054	positive regulation of DNA metabolic process	-4.83229	-2.82021	17/301	ACTB,HNRNPA2B1,HNRNPAB,PRKCQ,RAD51,SMARCB1,TFRC,UBE2V2,USP1,USP9X,TIMELESS,TOX,GINS1,ACTR2,CCT5,GINS3,E2F7
GO:0018105	peptidyl-serine phosphorylation	-4.81015	-2.80095	13/185	MAPK14,GSK3B,PRKCA,PRKCQ,MAPK7,PRKX,RPS6KA3,SGK1,TOP1,DYRK2,RPS6KA4,PBK,CAMK1D
GO:0010720	positive regulation of cell development	-4.7223	-2.72165	17/307	BIN1,EPHB2,HDAC2,HIF1A,ID4,ITGB1,L1CAM,NOTCH1,RHEB,CX3CL1,SOX11,SRF,LRP8,SLC7A5,ACTR2,TIAM2,DISC1
GO:0001843	neural tube closure	-4.65778	-2.66827	9/91	ADM,CASP3,OPA1,PFN1,RALA,LMO4,MTHFD1L,RGMA,PRICKLE1
GO:2001020	regulation of response to DNA damage stimulus	-4.63291	-2.65425	17/312	ACTB,CHEK1,RAD51,SMARCB1,SNAI1,SOX4,TAF5,UBE2V1,UBE2V2,USP1,TIMELESS,BAZ1B,ACTR2,POLQ,SF3B3,PBK,WDR76
GO:0060606	tube closure	-4.61946	-2.64694	9/92	ADM,CASP3,OPA1,PFN1,RALA,LMO4,MTHFD1L,RGMA,PRICKLE1
GO:0021955	central nervous system neuron axonogenesis	-4.50024	-2.55262	6/37	ADARB1,EPHB1,EPHB2,EPHB6,NFIB,B4GALT5
GO:0000280	nuclear division	-4.47697	-2.53678	17/321	BIRC5,CCNE1,CKS2,INCENP,MYBL1,RAD21,RAD51,RAN,CCNE2,KIF23,ACTR3,ACTR2,SMC2,MAPRE1,EML4,CYP26B1,NAA50
GO:1900152	negative regulation of nuclear-transcribed mRNA catabolic process, deadenylation-dependent decay	-4.4653	-2.53241	4/12	YBX1,SYNCRIP,IGF2BP1,PABPC1
GO:0007059	chromosome segregation	-4.46059	-2.5301	16/290	BIRC5,CCNE1,INCENP,RAD21,RAN,TOP1,USP9X,CCNE2,KIF23,ACTR3,ACTR2,SMC2,MAPRE1,EML4,HJURP,NAA50
GO:2000179	positive regulation of neural precursor cell proliferation	-4.45167	-2.52595	7/55	HIF1A,ID4,ITGB1,NOTCH1,CX3CL1,TOX,DISC1
GO:0021543	pallium development	-4.40559	-2.4908	12/174	CASP3,CDK6,EZH2,GSK3B,HIF1A,ID4,PEX13,SRF,ZIC1,LRP8,IGF2BP1,DISC1
GO:0033260	nuclear DNA replication	-4.37987	-2.46817	5/24	MCM2,MCM6,RAD51,GINS1,GINS3
GO:0071900	regulation of protein serine/threonine kinase activity	-4.36008	-2.45522	19/395	ACTB,BMP7,CASP3,CCNA2,CCNE1,CCNF,CDC25A,CKS2,EZH2,INCENP,ADAM17,TNFAIP3,CCNE2,PDCD10,CHORDC1,CCNJ,CCNJL,CCNYL1,CCNY
GO:1902692	regulation of neuroblast proliferation	-4.30087	-2.40937	6/40	HIF1A,ID4,ITGB1,NOTCH1,CX3CL1,DISC1
GO:0044786	cell cycle DNA replication	-4.28895	-2.40613	5/25	MCM2,MCM6,RAD51,GINS1,GINS3
GO:0007015	actin filament organization	-4.25284	-2.38064	15/270	ACTN1,RND3,FAT1,PLS3,FSCN1,SRF,TMOD1,HSP90B1,ARPC5,ACTR3,ACTR2,CORO1C,SH3KBP1,PPARGC1B,FAM171A1
GO:0021766	hippocampus development	-4.15927	-2.29744	8/82	CASP3,CDK6,EZH2,GSK3B,ID4,SRF,ZIC1,LRP8
GO:0048625	myoblast fate commitment	-4.04922	-2.21708	3/6	IFRD1,ITGB1,TCF7L2
GO:2000767	positive regulation of cytoplasmic translation	-4.04208	-2.21375	4/15	YBX1,SYNCRIP,IGF2BP1,PABPC1
GO:0021952	central nervous system projection neuron axonogenesis	-4.03976	-2.21332	5/28	ADARB1,EPHB1,EPHB2,EPHB6,NFIB
GO:0021761	limbic system development	-3.97602	-2.16076	9/111	CASP3,CDK6,EZH2,GSK3B,ID4,SRF,ZIC1,LRP8,ARPC5
GO:0021535	cell migration in hindbrain	-3.92291	-2.12213	4/16	EPHB1,EPHB2,ITGB1,POU4F1
GO:0007411	axon guidance	-3.87512	-2.08033	13/228	BMP7,EPHB1,EPHB2,EPHB6,EXT1,L1CAM,NFIB,NOTCH1,PRKCQ,TMEFF1,DPYSL5,ISL2,BCL11B
GO:0032508	DNA duplex unwinding	-3.8723	-2.08033	8/90	HMGA1,MCM2,MCM6,RAD51,RECQL,GINS1,POLQ,GINS3
GO:0097485	neuron projection guidance	-3.85626	-2.06949	13/229	BMP7,EPHB1,EPHB2,EPHB6,EXT1,L1CAM,NFIB,NOTCH1,PRKCQ,TMEFF1,DPYSL5,ISL2,BCL11B
GO:0140013	meiotic nuclear division	-3.84028	-2.05523	11/170	CCNE1,CKS2,INCENP,MYBL1,RAD21,RAD51,CCNE2,ACTR3,ACTR2,SMC2,CYP26B1
GO:0098813	nuclear chromosome segregation	-3.78193	-2.00706	13/233	BIRC5,CCNE1,INCENP,RAD21,RAN,CCNE2,KIF23,ACTR3,ACTR2,SMC2,MAPRE1,EML4,NAA50
GO:0051489	regulation of filopodium assembly	-3.69684	-1.94713	6/51	EPHB2,MYO10,RALA,FSCN1,SRF,RHOQ
GO:0032355	response to estradiol	-3.69025	-1.943	9/121	BMP7,CASP3,CCNA2,DNMT3A,EZH2,GJB2,POU4F1,PTGFR,PTGS2
GO:0042063	gliogenesis	-3.6737	-1.92957	13/239	CDK6,ID4,NFIB,NOTCH1,PPP3R1,RHEB,CX3CL1,SOX4,SOX11,LRP8,B4GALT5,DISC1,SH3TC2
GO:0061351	neural precursor cell proliferation	-3.64585	-1.9068	8/97	EPHB1,HIF1A,ID4,ITGB1,IGF2BP1,RAB10,DISC1,DOCK7
GO:0006282	regulation of DNA repair	-3.59218	-1.87173	12/212	ACTB,CHEK1,RAD51,SMARCB1,TAF5,UBE2V1,UBE2V2,USP1,TIMELESS,ACTR2,POLQ,SF3B3
GO:1903046	meiotic cell cycle process	-3.48131	-1.7942	11/187	CCNE1,CKS2,INCENP,MYBL1,RAD21,RAD51,CCNE2,ACTR3,ACTR2,SMC2,CYP26B1
GO:0051017	actin filament bundle assembly	-3.4714	-1.78839	6/56	ACTN1,PLS3,FSCN1,SRF,HSP90B1,FAM171A1
GO:0021545	cranial nerve development	-3.4714	-1.78839	6/56	ADARB1,EPHB1,EPHB2,EXT1,HOXA1,POU4F1
GO:0090329	regulation of DNA-templated DNA replication	-3.4292	-1.76217	6/57	MCM2,MCM6,TIMELESS,GINS1,GINS3,E2F7
GO:0051347	positive regulation of transferase activity	-3.39302	-1.7312	22/586	CKS2,EPHB1,EPHB2,EPHB6,EZH2,HNRNPA2B1,INCENP,MET,PRKCQ,MAP2K3,ADAM17,LRP8,DGKZ,LMO4,GINS1,PDCD10,DCUN1D1,CCDC88A,GINS3,DCUN1D5,CCNYL1,CCNY
GO:0000018	regulation of DNA recombination	-3.38468	-1.72414	9/133	ACTB,CHEK1,KPNA1,KPNA2,RAD51,TFRC,TIMELESS,ACTR2,POLQ
GO:0014013	regulation of gliogenesis	-3.35551	-1.70009	8/107	BIN1,EZH2,HDAC2,ID4,NOTCH1,RHEB,SOX11,SLC7A5
GO:0034248	regulation of cellular amide metabolic process	-3.34922	-1.69761	21/551	BIN1,CASP3,DAZL,EIF2S1,ELAVL1,YBX1,PDK1,ABCE1,RPS6KA3,SOX4,QKI,LRPPRC,SYNCRIP,IGF2BP1,IGF2BP3,IGF2BP2,LARP4B,PABPC1,DCPS,PTCD3,KBTBD8
GO:0061572	actin filament bundle organization	-3.30773	-1.66638	6/60	ACTN1,PLS3,FSCN1,SRF,HSP90B1,FAM171A1
GO:0060249	anatomical structure homeostasis	-3.29352	-1.65515	14/296	ACTB,DMD,EXT1,FOXC1,HIF1A,ITGB1,NOTCH1,PTGS2,CX3CL1,SRF,HOMER1,CIB2,WWTR1,DISC1
GO:0071456	cellular response to hypoxia	-3.29065	-1.65515	9/137	BMP7,CCNA2,DNMT3A,GATA6,HIF1A,NOTCH1,PDK1,PTGS2,VASN
GO:0045445	myoblast differentiation	-3.28554	-1.65125	5/40	IFRD1,ITGB1,NOTCH1,SRF,TCF7L2
GO:0021675	nerve development	-3.28333	-1.65026	7/84	ADARB1,EPHB1,EPHB2,EXT1,GABRA5,HOXA1,POU4F1
GO:0021954	central nervous system neuron development	-3.2522	-1.62633	7/85	ADARB1,EPHB1,EPHB2,EPHB6,NFIB,B4GALT5,DISC1
GO:0001892	embryonic placenta development	-3.22153	-1.60273	7/86	ADM,BMP7,HIF1A,SNAI1,TFEB,PLK4,E2F7
GO:0040011	locomotion	-3.1637	-1.55942	20/530	BMP7,MAPK14,EPHB1,EPHB2,EPHB6,EXT1,L1CAM,MET,NFIB,NOTCH1,PRKCQ,RALA,CX3CL1,FOSL1,TMEFF1,CYP7B1,LRP12,DPYSL5,ISL2,BCL11B
GO:0051656	establishment of organelle localization	-3.15487	-1.55553	16/378	ACTN4,HIF1A,INCENP,ITGB1,LMNB1,OPA1,RAB1A,RAN,ABCE1,XPO1,YWHAZ,LRPPRC,PDCD10,MAPRE1,EML4,DOCK7
GO:0048713	regulation of oligodendrocyte differentiation	-3.13815	-1.53993	5/43	HDAC2,ID4,NOTCH1,RHEB,TNFRSF21
GO:2000112	regulation of cellular macromolecule biosynthetic process	-3.12191	-1.53034	21/574	DAZL,EIF2S1,ELAVL1,GSK3B,YBX1,ABCE1,RPS6KA3,SOX4,TCF7L2,DYRK2,QKI,LRPPRC,SYNCRIP,IGF2BP1,IGF2BP3,IGF2BP2,LARP4B,PABPC1,DCPS,PTCD3,KBTBD8
GO:0036294	cellular response to decreased oxygen levels	-3.11295	-1.52357	9/145	BMP7,CCNA2,DNMT3A,GATA6,HIF1A,NOTCH1,PDK1,PTGS2,VASN
GO:2000177	regulation of neural precursor cell proliferation	-3.10312	-1.51483	7/90	HIF1A,ID4,ITGB1,NOTCH1,CX3CL1,TOX,DISC1
GO:1900151	regulation of nuclear-transcribed mRNA catabolic process, deadenylation-dependent decay	-3.06579	-1.49983	4/26	YBX1,SYNCRIP,IGF2BP1,PABPC1
GO:0000819	sister chromatid segregation	-3.04962	-1.48945	9/148	BIRC5,INCENP,RAD21,RAN,KIF23,SMC2,MAPRE1,EML4,NAA50
GO:0051639	actin filament network formation	-3.04035	-1.48766	3/12	ACTN1,PLS3,ARPC5
GO:0000070	mitotic sister chromatid segregation	-3.02578	-1.4741	8/120	BIRC5,INCENP,RAN,KIF23,SMC2,MAPRE1,EML4,NAA50

## Sheet: Suppl.Table S4
Supplementary Table S4. Differential methylation (beta-value) of ESR1 CpG probes in the ESR1 negative versus ESR1 positive samples
Hybridization_REF a	Gene_Symbol	Chromosome	Genomic_Coordinateb	Genomic_Coordinate GRCh38/hg38	Fold Change c	Mean_ESR1neg (87 samples)	Mean_ESR1pos (346 samples)	p_value
cg19449067	ESR1	6	152011103	151689968	1.529	0.449159	0.29376	0		CpGs_A
cg25338972	ESR1	6	152011178	151690043	1.55833	0.675689	0.433597	0
cg06611115	ESR1	6	152011200	151690065	1.62759	0.703024	0.431942	0
cg18745416	ESR1	6	152011399	151690264	1.52862	0.712241	0.465938	0
cg08161546	ESR1	6	152011415	151690280	1.675	0.526648	0.314416	0
cg04211581	ESR1	6	152011656	151690521	1.85446	0.22914	0.123561	0
cg18007957	ESR1	6	152011666	151690531	2.19844	0.267194	0.121538	0
cg22157087	ESR1	6	152012887	151691752	1.42	0.568768	0.40054	0
cg25565730	ESR1	6	152085565	151764430	1.29798	0.247698	0.190833	0
cg17741339	ESR1	6	152085619	151764484	1.21942	0.302695	0.248229	0.0039
cg18132851	ESR1	6	152085641	151764506	1.41336	0.314335	0.222403	0
cg09646983	ESR1	6	152125861	151804726	1.1365	0.748792	0.658859	0.0028
cg08907436	ESR1	6	152125965	151804830	1.07212	0.723957	0.675255	0.3159
cg07619683	ESR1	6	152126080	151804945	1.16681	0.746029	0.639377	0.0023
cg07189962	ESR1	6	152126092	151804957	1.15256	0.790941	0.68625	0.0021
cg07584093	ESR1	6	152126180	151805045	1.11927	0.664158	0.593384	0.018
cg10441070	ESR1	6	152126250	151805115	1.17424	0.454092	0.38671	0.0072
cg17706972	ESR1	6	152126337	151805202	1.02485	0.614858	0.599946	0.7792
cg01321962	ESR1	6	152126441	151805306	1.10558	0.664481	0.601027	0.0502
cg20893956	ESR1	6	152126736	151805601	1.15724	0.428773	0.370513	0.0044
cg24764793	ESR1	6	152126745	151805610	1.19346	0.534177	0.447588	0.0007
cg07746998	ESR1	6	152126785	151805650	1.16634	0.41649	0.35709	0.0001
cg21157690	ESR1	6	152126895	151805760	1.18782	0.41334	0.347981	0.0028
cg17264271	ESR1	6	152126938	151805803	1.23234	0.30023	0.243627	0.0003
cg15543523	ESR1	6	152127812	151806677	1.38923	0.815108	0.586732	0
cg26089753	ESR1	6	152127821	151806686	1.41077	0.766656	0.543432	0
cg08884395	ESR1	6	152127887	151806752	1.32121	0.617503	0.467376	0
cg01715172	ESR1	6	152128024	151806889	1.27451	0.655397	0.514234	0
cg21608605	ESR1	6	152128258	151807123	1.58578	0.373529	0.23555	0		CpG_B
cg20627916	ESR1	6	152128328	151807193	1.24318	0.244144	0.196387	0.0007
cg07671949	ESR1	6	152128338	151807203	1.19777	0.277702	0.231849	0.0041
cg23164938	ESR1	6	152128366	151807231	1.11781	0.161277	0.144279	0.2333
cg23165623	ESR1	6	152128411	151807276	1.11279	0.179167	0.161008	0.1734
cg21614759	ESR1	6	152128426	151807291	1.04956	0.0847552	0.0807532	0.5069
cg19411146	ESR1	6	152128471	151807336	1.17116	0.115362	0.0985022	0.0472
cg21950534	ESR1	6	152128483	151807348	1.01777	0.164832	0.161955	0.7456
cg11813455	ESR1	6	152128515	151807380	1.18646	0.101445	0.0855025	0.0401
cg24900983	ESR1	6	152128528	151807393	1.35907	0.207176	0.152439	0
cg05171584	ESR1	6	152128535	151807400	1.25651	0.209637	0.166841	0
cg23467008	ESR1	6	152128537	151807402	1.3887	0.0580698	0.0418158	0.0335
cg22839866	ESR1	6	152128584	151807449	0.999456	0.0967241	0.0967768	0.9675
cg23009221	ESR1	6	152128588	151807453	1.05874	0.135648	0.128122	0.1052
cg27316393	ESR1	6	152128675	151807540	1.14512	0.0684258	0.0597541	0.1001
cg00655307	ESR1	6	152128743	151807608	1.15757	0.0838018	0.0723946	0.0198
cg01777019	ESR1	6	152128805	151807670	1.10516	0.0480746	0.0435003	0.8974
cg15980539	ESR1	6	152128865	151807730	1.40826	0.0502913	0.0357117	0.0984		CpGs_island
cg11251858	ESR1	6	152129036	151807901	1.25485	0.0950437	0.0757411	0.0021
cg00920970	ESR1	6	152129388	151808253	1.36082	0.0530715	0.0389995	0.538
cg20253551	ESR1	6	152129400	151808265	1.23598	0.0673628	0.0545014	0.4977
cg02285263	ESR1	6	152129749	151808614	1.13881	0.0936335	0.0822202	0.4821
cg02720618	ESR1	6	152129791	151808656	1.18318	0.100689	0.0851	0.4339
cg04063345	ESR1	6	152130058	151808923	1.39325	0.508604	0.365048	0
cg15626350	ESR1	6	152130207	151809072	1.37995	0.449921	0.326041	0
cg00601836	ESR1	6	152130332	151809197	2.1763	0.742547	0.341197	0		CpG_C
cg03732055	ESR1	6	152201038	151879903	0.976603	0.885741	0.906961	0.0466
cg21265702	ESR1	6	152201605	151880470	1.14539	0.82913	0.723885	0
cg10939667	ESR1	6	152201611	151880476	1.12897	0.860292	0.762017	0
cg09414638	ESR1	6	152239860	151918725	0.970066	0.843527	0.869556	0.4626
cg07455133	ESR1	6	152379044	152057909	0.852688	0.64902	0.761146	0
cg12209876	ESR1	6	152381560	152060425	0.967719	0.921547	0.952288	0
cg25490334	ESR1	6	152387590	152066455	0.841882	0.687193	0.816258	0
cg03037684	ESR1	6	152421333	152100198	0.879235	0.5344	0.607801	0
cg07059469	ESR1	6	152421432	152100297	0.876586	0.586106	0.668624	0
a_ referred to Infinium HumanMethylation450 BeadChip probes	humanmethylation450
b_ GRCh37/hg19 human assembly
c_ fold change values between methylation beta leves in ESR1 negative over ESR1 positive samples
The CpGs ESR1 regions (CpGs_A, B and C) taken in consideration for their higher levels in ESR1 negative samples are higlighted in yellow
In grey the CpG reported to be part of the CpG Island

## Sheet: Suppl.Table S5
Supplementary Table S5. Differential methylation (beta-value) of PGR CpG probes in the PGR negative versus PGR positive samples
Hybridization_REF a	Gene_Symbol	Chromosome	Genomic_Coordinateb	Genomic_Coordinate GRCh38/hg38	Fold Change c	Mean_PGRneg (157 samples)	Mean_PGRpos (275 samples)	p_value
cg27121959	PGR	11	100905070	101034339	1.62098	0.569869	0.351558	0		CpG_A
cg16462297	PGR	11	100994089	101123358	1.07363	0.843814	0.785947	0
cg01671895	PGR	11	100997799	101127068	5.15927	0.322997	0.0626051	0		CpG_B
cg14772925	PGR	11	100998943	101128212	1.2048	0.241077	0.200096	0
cg26705960	PGR	11	100999009	101128278	2.37368	0.061047	0.0257183	0		CpGs_is170
cg25915838	PGR	11	100999077	101128346	1.84857	0.0972308	0.0525977	0
cg13906669	PGR	11	100999399	101128668	1.4727	0.117696	0.0799187	0
cg16581884	PGR	11	100999953	101129222	1.57293	0.0877651	0.0557973	0		CpGs_is32
cg22299741	PGR	11	101000164	101129433	1.49471	0.0992416	0.0663951	0
cg14933485	PGR	11	101000436	101129705	1.55258	0.0672076	0.0432878	0
cg23641145	PGR	11	101000566	101129835	1.31918	0.110494	0.0837601	0
cg23795893	PGR	11	101000589	101129858	1.09776	0.337066	0.307048	0.0018
cg22733687	PGR	11	101000618	101129887	1.21718	0.0889042	0.0730408	0.0211
cg13686012	PGR	11	101000655	101129924	1.41465	0.0654165	0.0462423	0
cg11637980	PGR	11	101000717	101129986	1.38208	0.269526	0.195014	0
cg23614125	PGR	11	101001257	101130526	0.956627	0.8042	0.840662	0.0147
cg16688583	PGR	11	101001533	101130802	0.893041	0.726869	0.813926	0
a_ referred to Infinium HumanMethylation450 BeadChip probes	humanmethylation450
b_ GRCh37/hg19 human assembly; PGR gene is encoding by the - strand
c_ fold change values between methylation beta leves in PGR negative over PGR positive samples; in red the FC >1.500
The CpGs (CpG_A and CpG_B) taken in consideration for their inverse correlation with PGR gene are higlighted in yellow
In grey and light blue the CpGs reported to be part of the CpG Island 170 and 32, respectively
